# Supplementary material for: Using discrete choice experiments to design interventions for heterogeneous preferences: protocol for a pragmatic randomised controlled trial of a preference-informed, heterogeneity-focused, HIV testing offer for high-risk populations
Source: PubMed Central journal article supplement — BMJ Open. 2020 Nov 6;10(11):e039313. doi: 10.1136/bmjopen-2020-039313 (PMC7651730; doi:10.1136/bmjopen-2020-039313), 2020-11-06
Supplement: bmjopen-2020-039313.draft_revisions.pdf [file bmjopen-2020-039313.draft_revisions.pdf]

# BMJ Open

BMJ Open is committed to open peer review. As part of this commitment we make the peer review history of every article we publish publicly available.

When an article is published we post the peer reviewers' comments and the authors' responses online. We also post the versions of the paper that were used during peer review. These are the versions that the peer review comments apply to.

The versions of the paper that follow are the versions that were submitted during the peer review process. They are not the versions of record or the final published versions. They should not be cited or distributed as the published version of this manuscript.

BMJ Open is an open access journal and the full, final, typeset and author-corrected version of record of the manuscript is available on our site with no access controls, subscription charges or pay-per-view fees (<http://bmjopen.bmj.com>).

If you have any questions on BMJ Open's open peer review process please email [info.bmjopen@bmj.com](mailto:info.bmjopen@bmj.com)

# BMJ Open

## Using discrete choice experiments to design interventions for heterogeneous preferences: protocol for a pragmatic randomized controlled trial of a preference-informed, heterogeneity-focused, HIV testing offer for high-risk populations

|                               |                                                                                                                                                                                                                                                                                                                                                                                                                                                                                                                                                                                                                                                                                                                                                                                                                                                                                                                                                                                                                                            |
|-------------------------------|--------------------------------------------------------------------------------------------------------------------------------------------------------------------------------------------------------------------------------------------------------------------------------------------------------------------------------------------------------------------------------------------------------------------------------------------------------------------------------------------------------------------------------------------------------------------------------------------------------------------------------------------------------------------------------------------------------------------------------------------------------------------------------------------------------------------------------------------------------------------------------------------------------------------------------------------------------------------------------------------------------------------------------------------|
| Journal:                      | <i>BMJ Open</i>                                                                                                                                                                                                                                                                                                                                                                                                                                                                                                                                                                                                                                                                                                                                                                                                                                                                                                                                                                                                                            |
| Manuscript ID                 | bmjopen-2020-039313                                                                                                                                                                                                                                                                                                                                                                                                                                                                                                                                                                                                                                                                                                                                                                                                                                                                                                                                                                                                                        |
| Article Type:                 | Protocol                                                                                                                                                                                                                                                                                                                                                                                                                                                                                                                                                                                                                                                                                                                                                                                                                                                                                                                                                                                                                                   |
| Date Submitted by the Author: | 16-Apr-2020                                                                                                                                                                                                                                                                                                                                                                                                                                                                                                                                                                                                                                                                                                                                                                                                                                                                                                                                                                                                                                |
| Complete List of Authors:     | Ostermann, Jan; University of South Carolina Arnold School of Public Health; Duke Global Health Institute<br>Njau, Bernard ; Kilimanjaro Christian Medical Centre<br>Hobbie, Amy; Duke Global Health Institute; Duke University Center for Health Policy and Inequalities Research<br>Mtuy, Tara; Kilimanjaro Christian Medical Centre; London School of Hygiene and Tropical Medicine Department of Global Health and Development<br>Masaki, Martha; Kilimanjaro Christian Medical Centre<br>Shayo, Aisa; Kilimanjaro Christian Medical Centre<br>van Zwetselaar, Marco; Kilimanjaro Christian Medical Centre<br>Masnick, Max; Selway Labs, LLC<br>Flaherty, Brian; University of Washington Department of Psychology<br>Brown, Derek S.; Washington University in Saint Louis George Warren Brown School of Social Work<br>Muehlbacher, Axel C.; Hochschule Neubrandenburg; Duke University Center for Health Policy and Inequalities Research<br>Thielman, Nathan; Duke University Department of Medicine; Duke Global Health Institute |
| Keywords:                     | HIV & AIDS < INFECTIOUS DISEASES, Public health < INFECTIOUS DISEASES, PUBLIC HEALTH, STATISTICS & RESEARCH METHODS, HEALTH ECONOMICS                                                                                                                                                                                                                                                                                                                                                                                                                                                                                                                                                                                                                                                                                                                                                                                                                                                                                                      |
|                               |                                                                                                                                                                                                                                                                                                                                                                                                                                                                                                                                                                                                                                                                                                                                                                                                                                                                                                                                                                                                                                            |

SCHOLARONE™  
Manuscripts

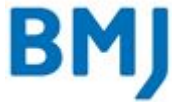

I, the Submitting Author has the right to grant and does grant on behalf of all authors of the Work (as defined in the below author licence), an exclusive licence and/or a non-exclusive licence for contributions from authors who are: i) UK Crown employees; ii) where BMJ has agreed a CC-BY licence shall apply, and/or iii) in accordance with the terms applicable for US Federal Government officers or employees acting as part of their official duties; on a worldwide, perpetual, irrevocable, royalty-free basis to BMJ Publishing Group Ltd ("BMJ") its licensees and where the relevant Journal is co-owned by BMJ to the co-owners of the Journal, to publish the Work in this journal and any other BMJ products and to exploit all rights, as set out in our [licence](#).

The Submitting Author accepts and understands that any supply made under these terms is made by BMJ to the Submitting Author unless you are acting as an employee on behalf of your employer or a postgraduate student of an affiliated institution which is paying any applicable article publishing charge ("APC") for Open Access articles. Where the Submitting Author wishes to make the Work available on an Open Access basis (and intends to pay the relevant APC), the terms of reuse of such Open Access shall be governed by a Creative Commons licence – details of these licences and which [Creative Commons](#) licence will apply to this Work are set out in our licence referred to above.

Other than as permitted in any relevant BMJ Author's Self Archiving Policies, I confirm this Work has not been accepted for publication elsewhere, is not being considered for publication elsewhere and does not duplicate material already published. I confirm all authors consent to publication of this Work and authorise the granting of this licence.

1  
2  
3  
4  
5  
6  
7  
8  
9

## Using discrete choice experiments to design interventions for heterogeneous preferences: protocol for a pragmatic randomized controlled trial of a preference-informed, heterogeneity-focused, HIV testing offer for high-risk populations

10  
11  
12  
13  
14  
15

### List of authors:

Jan Ostermann<sup>1, 2, 3, 4\*</sup>, Bernard Njau<sup>5</sup>, Amy Hobbie<sup>3,4</sup>, Tara Mtuy<sup>5,6</sup>, Martha Masaki<sup>5</sup>, Aisa Shayo<sup>5</sup>, Marco van Zwetselaar<sup>5</sup>, Max Masnick<sup>7</sup>, Brian P. Flaherty<sup>8</sup>, Derek S. Brown<sup>9</sup>, Axel C. Muehlbacher<sup>4,10,11</sup>, Nathan Thielman<sup>3,4</sup>

16  
17  
18

### Corresponding author:

Jan Ostermann  
Department of Health Services Policy & Management  
University of South Carolina  
915 Greene Street  
Columbia, SC, 29205, USA  
[jano@mailbox.sc.edu](mailto:jano@mailbox.sc.edu)

25  
26  
27

### Names and locations of institutions

28  
29  
30  
31  
32

<sup>1</sup> Department of Health Services Policy & Management, University of South Carolina, 915 Greene Street, Columbia, SC, 29205, USA

<sup>2</sup> South Carolina SmartState Center for Healthcare Quality, University of South Carolina, Columbia, SC, USA

<sup>3</sup> Duke Global Health Institute, Duke University, Durham, NC, USA

<sup>4</sup> Center for Health Policy & Inequalities Research, Duke University, Durham, NC, USA

<sup>5</sup> Kilimanjaro Christian Medical Centre, Moshi, Tanzania

<sup>6</sup> Department of Global Health and Development, London School of Hygiene and Tropical Medicine, London, UK

<sup>7</sup> Selway Labs, LLC, Barrington, RI, USA

<sup>8</sup> Department of Psychology, University of Washington, Seattle, Washington, USA

<sup>9</sup> Brown School, Washington University in St. Louis, St. Louis, Missouri, USA

<sup>10</sup> Institut Gesundheitsökonomie und Medizinmanagement, Hochschule Neubrandenburg, Neubrandenburg, Germany

<sup>11</sup> Department of Population Health Sciences, Duke University, Durham, NC, USA

49  
50  
51  
52  
53  
54

**Keywords:** HIV counseling and testing; Discrete choice experiment; Preference heterogeneity; Latent class analysis; Pragmatic randomized controlled trial

55  
56  
57  
58  
59  
60

**Word count:** 4,982

# Using discrete choice experiments to design interventions for heterogeneous preferences: protocol for a pragmatic randomized controlled trial of a preference-informed, heterogeneity-focused, HIV testing offer for high-risk populations

## Abstract

**Introduction.** Approximately one million undiagnosed persons living with HIV (PLWH) in Southern and Eastern Africa need to test for HIV. Novel approaches are necessary to identify HIV testing options that match the heterogeneous testing preferences of high-risk populations. This pragmatic randomized controlled trial (PRCT) will evaluate the efficacy of a preference-informed, heterogeneity-focused HIV counseling and testing (HCT) offer, for improving rates of HIV testing in two high-risk populations.

**Methods and Analysis.** The study will be conducted in Moshi, Tanzania. The PRCT will randomize 600 female barworkers and 600 male Kilimanjaro mountain porters across three study arms. All participants will receive an HIV testing offer comprised of four preference-informed testing options, including one “common” option – comprising features that are commonly available in the area and, on average, are most preferred among study participants – and three options that are specific to the study arm. Options will be identified using mixed logit and scale-adjusted latent class analyses of data from a discrete choice experiment (DCE). Participants in Arm 1 will be offered the common option and three “targeted” options that are predicted to be more preferred than the common option and combine features widely available in the study area. Those in Arm 2 will be offered the common option and three “enhanced” options, which also include HCT features that are not yet widely available in the study area.

1  
2  
3 Participants in Arm 3 will be offered the common option and three predicted “less preferred”  
4 testing options. The primary outcome will be uptake of HIV testing.  
5  
6  
7

8 **Ethics and Dissemination.** Ethical approval was obtained from Institutional Review Boards in  
9 the United States and in Tanzania. Findings will be published in peer-reviewed journals. The  
10 use of rigorous DCE methods for the preference-based design and tailoring of interventions  
11 could lead to novel policy options and implementation science approaches.  
12  
13  
14  
15  
16  
17  
18  
19

## 20 **Strengths and limitations of this study**

21  
22  
23

- 24 • The pragmatic randomized controlled trial described in this protocol paper includes  
25 males and females at high risk of HIV infection; the implementation of the trial in  
26 collaboration with all HIV testing providers in the study area allows for the evaluation of  
27 testing uptake in a nearly closed system.  
28
- 29 • The study goes beyond the traditional approach of evaluating single-offer (“one-size-fits-  
30 all”) interventions by identifying combinations of testing options that explicitly target  
31 preference heterogeneity in the target population.  
32
- 33 • The methods used to identify the intervention conditions evaluated in the trial, including  
34 the scale-adjusted latent class (SALC) analysis of data from the discrete choice  
35 experiment (DCE) used to elicit heterogeneous population preferences for HIV testing,  
36 may be applied to other contexts and may lead to the development of new  
37 implementation science approaches for systematically adapting effective interventions to  
38 local contexts.  
39  
40  
41  
42  
43  
44  
45  
46  
47  
48  
49  
50  
51  
52  
53  
54  
55  
56  
57  
58  
59  
60

- The study design will allow for separate estimates of the effects of SMS reminders, the issuance of physical HIV testing invitation cards, the heterogeneity-focused testing offer, and an incentive offer on HIV testing rates.
- Potential limitations include loss to follow-up during the multi-phase study, the finite range of HIV testing characteristics that can be include in a DCE, exogenous events during the study period that may influence rates of HIV testing across study arms, and limited generalizability of specific study findings to other populations and settings.

### Keywords (longer list)

HIV counseling and testing; Discrete choice experiment; Preference heterogeneity; Latent class analysis; Pragmatic randomized controlled trial; Mobile health (mHealth); Conditional financial transfers; Policy design; Tanzania; sub-Saharan Africa

## Background

In 2018, 37.9 million people were living with HIV worldwide, and 770,000 died of HIV-related illnesses.<sup>1</sup> HIV counseling and testing (HCT) is a cost-effective intervention for increasing HIV serostatus awareness,<sup>2,3</sup> a point of entry into HIV care and treatment, and an important means of primary and secondary HIV prevention.<sup>4</sup> HIV Prevention Trials Network Protocol 052 conclusively demonstrated a marked reduction in HIV transmission among serodiscordant couples in which the HIV-infected partner was begun on antiretroviral therapy early in the course of infection.<sup>5</sup> Subsequently, public health officials and policymakers, considering treatment as prevention, have called for dramatic increases in HIV testing — as frequently as annually in many populations and semi-annually among individuals at high risk.<sup>6</sup>

In 2014, the Joint United Nations Programme on HIV/AIDS (UNAIDS) set for 2020 the ambitious 90-90-90 target: diagnosing 90% of all persons living with HIV (PLWH), initiating treatment for 90% of those diagnosed, and achieving viral suppression for 90% of those treated.<sup>7</sup> While substantial progress has been made toward these targets since 2014, most countries remain short of at least one target, and the number of undiagnosed HIV infections in every region are considered a major hindrance to achieving the UNAIDS targets and ending the epidemic.<sup>8</sup> Novel approaches are needed to increase testing uptake, especially among high-risk groups.

In order to establish the diagnosis of HIV in 90% of all PLWH in Eastern and Southern Africa, more than 1 million undiagnosed infected persons need to test, including 190,000 in Tanzania.<sup>4,6,9</sup> Tanzania's 2017-22 Health Sector HIV and AIDS Strategic Plan (HSHSP-IV) lists as a key challenge that HIV testing services “need to be more efficient and ambitious to meet the 90-90-90 targets through more targeted testing approaches.”<sup>10</sup> Evaluations of population preferences for testing have typically focused on the acceptability of specific testing options, such as home-based,<sup>11-13</sup> provider-initiated,<sup>14-17</sup> or workplace testing,<sup>18,19</sup> usually without



1  
2  
3 consideration or offer of other options. Results from these narrow assessments do not probe the  
4 potential diversity in testing preferences among target populations and cannot characterize  
5 which testing options will maximize uptake of testing.<sup>20-22</sup>  
6  
7  
8

9  
10 Discrete choice experiments (DCEs), grounded in the economic theory of utility maximization,  
11 are specifically designed to provide information about individuals' preferences for varying  
12 characteristics of multi-attribute products. The DCE method is based on the assumption that a  
13 product or service such as HCT can be described in terms of its characteristics, namely  
14 attributes and levels within attributes. Participants are repeatedly asked to choose between two  
15 or more alternatives in choice scenarios simulating real choice decisions. Each alternative  
16 differs in the arrangement of attribute levels presented to the participant. The choice scenarios  
17 are systematically varied by means of an experimental design.<sup>23-26</sup> Relative attribute importance,  
18 the utility that respondents derive from the diverse options, and trade-offs, i.e., the willingness to  
19 trade between attribute levels, can be quantified analytically.<sup>27</sup> DCEs are used increasingly to  
20 understand patient perspectives and to design patient-centered interventions. Although DCEs  
21 have been used in various contexts related to HIV, including testing,<sup>20,28-32</sup> prevention,<sup>33-36</sup>  
22 service delivery,<sup>37-39</sup> and treatment,<sup>40-43</sup> to our knowledge DCEs have not yet been used to  
23 systematically design HIV counseling and testing interventions.  
24  
25  
26  
27  
28  
29  
30  
31  
32  
33  
34  
35  
36  
37  
38  
39  
40

41 Below we describe the study protocol for a pragmatic randomized controlled trial (PRCT) that  
42 evaluates the efficacy of a targeted, preference-informed HCT offer for improving rates of HIV  
43 testing in high-risk populations. The testing offer is developed using data from a discrete choice  
44 experiment (DCE) and designed to match the heterogeneous HIV testing preferences in the  
45 target population. To our knowledge this is the first PRCT in which the study conditions are  
46 optimized using data from a DCE, and the first PRCT that evaluates an intervention explicitly  
47 targeting preference heterogeneity. Our hypothesis is that a preference-informed,  
48  
49  
50  
51  
52  
53  
54  
55  
56  
57  
58  
59  
60

1  
2  
3 heterogeneity-focused HIV testing offer increases uptake of HIV testing relative to an offer  
4  
5 designed to target the average preferences of high-risk populations.  
6  
7  
8  
9

## 10 11 **Methods/Design**

### 12 13 **Study aim and hypothesis**

14  
15  
16 The aim of this study is to evaluate the efficacy of a preference-informed, heterogeneity-focused  
17  
18 HCT offer for improving rates of HIV testing among two high-risk populations. We hypothesize  
19  
20 that an HIV testing offer matched to the specific preferences of the intended target population  
21  
22 and explicitly accounting for preference heterogeneity within these populations will increase  
23  
24 rates of testing relative to a control offer.  
25  
26  
27  
28  
29

### 30 31 **Study setting**

32  
33 The study is conducted in Moshi, Tanzania. Moshi is the commercial center and administrative  
34  
35 capital of the Kilimanjaro Region in Northern Tanzania and has an estimated population of  
36  
37 about 200,000.<sup>44</sup> Moshi has 25 HCT facilities, including 8 care and treatment centres (CTCs),  
38  
39 which provide free HIV care to persons living with HIV.<sup>45</sup> The study is implemented with support  
40  
41 from the Regional Medical Officer and the Regional AIDS Control Coordinator of the Kilimanjaro  
42  
43 Region.  
44  
45  
46

### 47 48 **Study participants**

49  
50 The study population comprises women employed in bars, restaurants and guesthouses serving  
51  
52 alcohol to patrons ("female barworkers", FBW), and male mountain porters who are supporting  
53  
54 climbers of nearby Mount Kilimanjaro ("Kilimanjaro mountain porters", KMP). The Regional  
55  
56  
57  
58  
59  
60

1  
2  
3 AIDS Control Coordinator identified these groups as populations at high risk of HIV infection  
4 who could benefit from increased rates of testing; we subsequently showed that FBW and KMP  
5 engage in higher rates of HIV risk behaviors than randomly selected male and female  
6 community members in the same setting.<sup>20</sup> A census of bars and female barworkers, conducted  
7 by the study team between February and June of 2016, identified 612 venues within Moshi, with  
8 2,059 age-eligible FBW. There are an estimated 10,000 porters in the Kilimanjaro Region.<sup>46,47</sup>  
9 Eligible study participants are ages 18 or older, reside in Moshi, are able to read, and have no  
10 plans to leave the study area during the 12-15 month period following study enrollment.  
11  
12  
13  
14  
15  
16  
17  
18  
19  
20

### 21 Outcome measure

22  
23  
24 The primary outcome measure is uptake of HIV testing. During the study, the outcome measure  
25 will be ascertained repeatedly through a combination of self-reports from study participants and  
26 the documentation of HIV tests and test results by HIV testing providers.  
27  
28  
29  
30

### 31 Study design

32  
33  
34 The study is comprised of 5 sequential phases (**Figure 1**). The target duration for each phase is  
35 13 weeks (91 days). The outcome measure will be observed in each phase.  
36  
37  
38  
39

40 **Phase A: Reference phase.** Phase A includes no intervention. The purpose of this phase is to  
41 inform estimates of background rates of HIV testing among individuals participating in a  
42 research study focusing on HIV testing. A phone survey after 13 weeks (91 days) will ask  
43 participants about any HIV test during Phase A.  
44  
45  
46  
47  
48

49 **Phase B: SMS phase.** In Phase B, a Short Messaging System (SMS) reminder message to  
50 test for HIV will be sent to participants 4 weeks (28 days) after the beginning of Phase B. The  
51 purpose of this phase is to inform estimates of the effect of an SMS reminder on rates of HIV  
52  
53  
54  
55  
56  
57  
58  
59  
60

1  
2  
3 testing. A phone survey after 13 weeks (91 days) will ask participants about any HIV test during  
4  
5 Phase B.  
6  
7

8 **Phase C: Invitation phase.** In Phase C, participants will be given a credit card-sized invitation  
9  
10 card describing an HIV testing option that combines features commonly available in the study  
11  
12 area, and that, on average, are most preferred among study participants (“**common option**”).  
13  
14 This option will be the same for FBW and KMP. Four weeks (28 days) after the beginning of  
15  
16 Phase C, participants will be sent an SMS reminder to test for HIV as shown on the invitation  
17  
18 card given to them. The purpose of this study phase is to inform estimates of the effect of a  
19  
20 testing invitation on rates of HIV testing. A phone survey after 13 weeks (91 days) will ask  
21  
22 participants about any HIV test during Phase C.  
23  
24  
25

26 **Phase D: The pragmatic randomized controlled trial.** Phase D is a PRCT that includes three  
27  
28 parallel study arms (**Table 1**). All participants will receive an HIV testing offer comprised of four  
29  
30 invitation cards describing preference-informed HIV testing options. Options will be identified  
31  
32 using mixed logit and scale-adjusted latent class (SALC) analyses of data from a discrete  
33  
34 choice experiment (DCE) with members of the target populations (see below). **Arm 1** will be  
35  
36 offered the common option and three “**targeted**” options, predicted to be jointly more preferred  
37  
38 than the common option and comprising testing features widely available in the study area.  
39  
40 **Arm 2** will be offered the common option and three “**enhanced**” options, which are also  
41  
42 predicted to be jointly more preferred than the common option but include additional features  
43  
44 that are not yet widely available in the study area. **Arm 3** will be offered the common option and  
45  
46 three options that are jointly predicted to be “**less preferred**” than the common option.  
47  
48 Participants will be asked to test for HIV using the most preferred of the 4 testing options given  
49  
50 to them. Arms 1 and 2 are intervention arms. Arm 3 represents an active control arm: study  
51  
52 involvement in Arm 3 is the same as in Arms 1 and 2. Four weeks (28 days) after the beginning  
53  
54 of Phase D, participants will be sent an SMS reminder to test for HIV using any of the testing  
55  
56  
57  
58  
59  
60

options given to them. The purpose of this study phase is to obtain estimates of the effect of a heterogeneity-focused HIV testing offer on rates of HIV testing. A phone survey after 13 weeks (91 days) will ask participants about any HIV test during Phase D.

**Phase E: Incentive phase.** In phase E, participants will be offered an incentive to test for HIV using their choice of any of the testing options remaining to them from Phase D. An SMS reminder will be sent to participants 4 weeks (28 days) after the beginning of Phase E. The purpose of this phase is to inform estimates of the effect of a conditional financial transfer (CFT) on testing decisions and identify the most preferred testing option among those offered, among participants who did not test during Phase D.

The study design will allow for separate estimates of the effects on HIV testing rates of:

- (1) an SMS reminder message,
- (2) a testing invitation,
- (3) a heterogeneity-focused testing offer, and
- (4) a conditional financial transfer (CFT) offer.

### Assignment to study arms

Participant IDs will be randomly assigned to study arms using a random number generator. The testing offer in Phase D will reflect the study arm assigned to the respective Participant ID. The random assignment is expected to result in approximately equal numbers of participants in each study arm.

### Design of the intervention

**Overview.** A DCE with a representative sample of members of the target population will be used to elicit information on the distribution of preferences for feasible and modifiable

1  
2  
3 characteristics of HIV testing options in the target population. DCE data will be analyzed, and  
4 results of these analyses will be used to identify four types of testing options that will be offered  
5 to participants in the PRCT:  
6  
7  
8  
9

- 10 1) **A “common” option.** This single testing option combines testing features that are  
11 widely available in the study area, and, on average, are most preferred among study  
12 participants. This option will be offered to all participants in Phases C and D.  
13
- 14 2) **Three “targeted” options.** This set of testing options, comprising features widely  
15 available in the study area, is predicted to be jointly more preferred than the common  
16 option by the largest possible share of participants.  
17
- 18 3) **Three “enhanced” options.** Enhanced testing options include additional features that  
19 are not yet widely available in the study area (e.g., oral testing). The set of enhanced  
20 testing options is predicted to be jointly more preferred than the common option by the  
21 largest possible share of participants.  
22
- 23 4) **Three “less preferred” options.** This set of testing options includes options that are  
24 predicted to be equally or less preferred than the common option by the largest possible  
25 share of participants.  
26  
27  
28  
29  
30  
31  
32  
33  
34  
35  
36  
37  
38

39 Testing options will not differ between FBW and KMP. The design decision to offer three  
40 targeted, enhanced, and less preferred options was driven by practical considerations: (1) a  
41 choice from 4 alternatives (the common option plus 3 options specific to the study arm) is  
42 expected to be cognitively feasible for participants, (2) the implementation of 10 testing options  
43 (one common option, plus 3 targeted, 3 enhanced, and 3 less preferred options) as part of this  
44 study is feasible from a logistical and budgetary perspective; and (3) the widespread  
45 implementation of 3 testing options that target preference heterogeneity in the two high-risk  
46 populations is feasible in the study area. Similarly, the decision to offer the same options to  
47  
48  
49  
50  
51  
52  
53  
54  
55  
56  
57  
58  
59  
60

1  
2  
3 FBW and KMP was made because, in practice, a gender- or risk group specific implementation  
4 of testing options is not feasible.  
5  
6  
7

### 8 **Development and fielding of the DCE**

9

10  
11 A DCE with 300 FBW and 300 KMP recruited prior to the PRCT will characterize the patterns  
12 and variability in HIV testing preferences in the target population. The DCE development will  
13 follow established guidelines and procedures established in our prior studies of HIV testing  
14 preferences.<sup>21,23,48</sup> Focus group discussions with members of the target populations will be used  
15 to prioritize HIV testing features with respect to their expected influence on HIV testing  
16 decisions, and to establish levels of features that represent plausible trade-offs in actual or  
17 hypothetical HIV testing interventions.  
18  
19  
20  
21  
22  
23  
24  
25  
26

27 In the DCE survey, respondents will be introduced to each attribute and level and asked to  
28 complete 12 to 16 choice tasks. Each choice task will include 3 hypothetical testing options;  
29 participants will be asked to identify their preferred alternative. The combination of alternatives  
30 presented to respondents as part of the DCE will be varied according to a *d*-efficient, orthogonal  
31 statistical design,<sup>49</sup> generated in Ngene software (ChoiceMetrics). Survey content and  
32 presentation will be tested in up to 40 guided individual pretest interviews. Pilot studies with at  
33 least 200 participants will yield statistical priors that inform the statistical design of the final DCE.  
34 DCE surveys will be administered in-person, in Kiswahili (a language commonly used in the  
35 study area), using tablet devices, by trained research staff using the custom-built survey  
36 software, *comet* (Selway Labs).  
37  
38  
39  
40  
41  
42  
43  
44  
45  
46  
47  
48

### 49 **Analysis of DCE data**

50

51  
52 The analysis of DCE data will follow established guidelines.<sup>23,48</sup> To estimate mean (average)  
53 preferences in the study population, DCE data will be first analyzed using mixed, or random  
54  
55  
56  
57  
58  
59  
60

1  
2  
3 parameters, logit models using Stata (StataCorp) version 15,<sup>50</sup> which traditionally were  
4 considered best practice for analyzing DCE data,<sup>51</sup> but focus on average preferences. To model  
5 systematic variation in preferences across respondents, a scale-adjusted latent class (SALC)  
6 model will be estimated in Latent Gold Choice version 5.0 (Statistical Innovations Inc. 2018).  
7 SALC models allow for the joint modeling of preference heterogeneity (systematic variation in  
8 preferences across respondents) and variation in response certainty or consistency (normal  
9 response variation within an individual); these two sources of variation are confounded in  
10 traditional multinomial logit models. The Bayesian Information Criterion (BIC) will be used to  
11 identify which model yields the best fit for the data.  
12  
13  
14  
15  
16  
17  
18  
19  
20  
21  
22

### 23 **Selection of testing options for inclusion in the PRCT**

24  
25  
26 Results from the mixed logit model will be used to identify the common option; results from the  
27 best-fitting latent class model will be used to identify the combinations of targeted, enhanced,  
28 and less-preferred options to be included in the PRCT.  
29  
30  
31  
32

33 **Common option:** The common option will combine the most preferred (on average) levels of  
34 each attribute included in the DCE, as described by the mean parameter estimates from the  
35 mixed logit model.  
36  
37  
38  
39  
40

41 **Targeted, enhanced, and less-preferred options:** The latent class analysis will identify  
42 statistical groupings of individuals with similar sets of preferences; these groupings are referred  
43 to as classes. Using parameter estimates from the latent class model, we will predict class-  
44 specific relative preferences for all feasible combinations of feature levels (i.e., testing options),  
45 which, in turn, will be converted into predicted choice probabilities in a simulated choice  
46 between the respective testing option and the “common option”. Class-specific predicted choice  
47 probabilities will be aggregated across classes (taking into consideration the estimated class  
48 sizes) to calculate the share of the population predicted to prefer each testing option over the  
49  
50  
51  
52  
53  
54  
55  
56  
57  
58  
59  
60



1  
2  
3 common option. These shares are used, as follows, to generate population-based rankings of  
4 all feasible combinations of three testing options. For targeted options, we will select from all  
5 options that combine features currently available in the study area those three options that  
6 jointly maximize the share of participants predicted to choose at least one of the three targeted  
7 options over the common option. Similarly, for enhanced options, we will select from all options  
8 that include additional features not yet widely available in the study area those three options that  
9 jointly maximize the share of participants predicted to choose at least one of the three enhanced  
10 options over the common option. For less preferred options, we will select those three options  
11 that jointly maximize the share of participants predicted to prefer the common option over all  
12 less preferred options.  
13  
14  
15  
16  
17  
18  
19  
20  
21  
22  
23  
24

### 25 **Presentation of testing options to study participants**

26  
27  
28 Testing options will be presented to participants on physical invitation cards. Each participant  
29 will be personally given 4 cards; each card will describe the characteristics of the testing option  
30 in a format similar to that presented in the DCE. The combination of cards given to a participant  
31 will be determined by the study arm assigned to the participant; references to specific testing  
32 venues may be varied according to participants' location of residence or preferred testing  
33 venue. Cards will have unique codes that allow for the tracking of participants' testing uptake  
34 across testing venues in the study area.  
35  
36  
37  
38  
39  
40  
41  
42  
43

### 44 **SMS delivery**

45  
46  
47 SMS messages will be sent via a highly versatile, low-cost, mHealth system, called *mobile*  
48 *phone based appointment reminder and incentive system (mParis)*, which can autonomously  
49 send large numbers of SMS messages according to pre-specified algorithms and is based in the  
50 study area.<sup>52,53</sup>  
51  
52  
53  
54  
55  
56  
57  
58  
59  
60

## Testing incentive

During Phase E, an incentive in the amount of TSH 5000 (~US \$2.20) will be given in cash to participants presenting for testing with a coded testing invitation card at any of the testing venues in the study area. The amount is based on a prior willingness-to-accept study in the same area.<sup>54</sup>

## Sample size

The target sample size for the PRCT is 1200 participants, comprising equal numbers of FBW and KMP. Randomization across study arms is expected to result in three groups with approximately 400 participants each.

## Recruitment

Participants in formative work will be recruited using convenience and snowball sampling. For DCE surveys and the PRCT, mountain porters will be recruited from the Mweka gate of Kilimanjaro National Park. The Mweka gate is selected because of its proximity to Moshi (~15 kilometers); four of six popular climbing routes descend through this gate. Porters exiting the gate will be approached sequentially, and eligible porters will be handed an invitation card containing contact information and an invitation to the study's research office for consent and enrollment. For the recruitment of female barworkers, bars will be randomized and visited in the order of randomization. Eligible FBW will be consented at their place of work or given invitation cards containing contact information and an invitation to the study's research office for consent and enrollment. Recruited participants may receive reminder phone calls or SMS messages to come to the study offices for more information and study enrollment.

## Enrollment and informed consent

Eligible individuals contacted for participation in the study will be informed by trained study personnel of the study purpose, procedures, as well as risks and benefits during the informed consent process. Only consenting individuals will be included in the study. Study participants' mobile phone numbers and the name and phone number of a contact person through whom they can be reached will be recorded to allow for phone-based follow-up.

## Blinding

Participants will be blinded with respect to their assignment across the three study arms. While research staff are not blinded to participants' study arm assignment, study procedures are the same for all arms except for the characteristics of the testing offer.

## Study activities

Study activities and their schedule are shown in **Table 2**.

Participants providing informed consent will be enrolled in the study. At the time of enrollment, a baseline survey will be conducted with all participants to assess socio-demographic characteristics, testing history, testing preferences, HIV serostatus, and HIV risk.

After enrollment, participants will progress through up to 5 study phases. Phase A represents a no-intervention phase. Phase B starts with the completion of a Phase A follow-up survey. Phase C starts with the distribution of a physical invitation card that describes the "common" option. Phase D starts with the distribution of four physical invitation cards that describe the preference-informed HIV testing options, namely the "common" option and three "targeted", "enhanced", or predicted "less preferred" options, depending on the study arm. Phase E starts with a phone call or SMS message offering a financial incentive to test. SMS reminder messages will be sent 28

1  
2  
3 days after the beginning of Phases B, C, D, and E. Phases A and B will end with a short phone-  
4 based survey with study participants. Phases C, D, and E will end with a phone-based survey or  
5 the collection of a testing invitation card from testing sites, whichever occurs earlier. After the  
6 completion of Phases B and C, participants will be contacted by phone and SMS and invited to  
7 come to the local study office for receipt of testing options.  
8  
9  
10  
11  
12

13  
14 HIV testing will be done in accordance with Tanzania's National AIDS Control Program (NACP)  
15 guidelines.<sup>55</sup> As per NACP guidelines, participants testing positive for HIV will be linked to care  
16 at a local CTC. Participants who report having tested positive for HIV, or those for whom  
17 documentation of a positive HIV test is collected from testing sites, will discontinue participation  
18 in HIV testing related components of the study and will instead be asked a brief survey about  
19 their linkage to HIV care and treatment.  
20  
21  
22  
23  
24  
25  
26  
27

### 28 **Study timeline**

29  
30  
31 The schedule of activities implies a minimum time of 15 months for participants to progress  
32 through all 5 study phases. Delays in reaching participants by phone and delays in participants  
33 returning to study offices will extend the duration of follow-up. In order to minimize loss to follow-  
34 up prior to the PRCT and reduce variability in the timing of the PRCT across participants, all  
35 participants in Phases A, B or C who are 91 or more days late for a follow-up assessment will  
36 transition to Phase D during their next in-person visit. Additionally, participants may be directly  
37 enrolled into Phases C and D (**Figure 1**). Study enrollment will continue until the target number  
38 of N=1200 participants in the PRCT (Phase D) has been reached. Follow-up will continue until 6  
39 months after the last participant enters Phase D.  
40  
41  
42  
43  
44  
45  
46  
47  
48  
49  
50  
51  
52  
53  
54  
55  
56  
57  
58  
59  
60

## Participant retention

To maximize retention, study participants due for follow-up may receive multiple phone calls and SMS reminders to come to the study offices. Escalating incentives, i.e., incentive amounts that increase across consecutive study phases, will be used. Differences in baseline characteristics between participants retained and participants lost to follow-up will be analyzed statistically to evaluate selection biases.

## Statistical analysis

The primary analysis involves the comparison of testing rates between study arms in Phase D. The effect of the intervention — a preference-informed, heterogeneity-focused, HIV testing offer — will be described by differences in testing uptake between those offered targeted or enhanced options, relative to those offered predicted less preferred options. Statistical significance will be evaluated in a bivariate analysis using a chi-squared test. Logistic regression analysis will evaluate the statistical significance of differences in a multivariate framework. Uptake of HIV testing within 3 months of the beginning of Phase D will be the binary outcome variable; study arm will be the key explanatory variable. Systematic variation in the efficacy of the intervention, e.g., by gender or with HIV risk, can be modeled using interactions between study arm and the respective covariates.

Survival models with up to 5 observations per participant (one each for Phases A, B, C, D, and E) will be used to estimate the differential effects of study arm assignment, SMS reminders, invitations, and conditional financial incentives, on rates of HIV testing. The time until an HIV test following the beginning of the respective study phase constitutes the dependent variable. “Exposure” to SMS reminders, invitations, and a financial incentive are hypothesized to increase the “hazard” of testing relative to no intervention.

## Statistical power

**DCE.** Statistical power in DCEs varies with sample size, the number of choice tasks, the number of alternatives per task, and the number of attributes and levels, among other characteristics. An empirical power-test formula by Yang et al (2015) suggests that the DCE sample size (N=600) allows us to estimate the utility difference between the most and least-preferred testing options with a precision that is better than that of 'the average' DCE study.<sup>56</sup> A sample size guidance by Orme<sup>57</sup> suggests that the three cohorts (N=400 each) are sufficiently large to derive independent estimates for each sub-cohort.

**PRCT.** The sample size for the three-arm trial (N=1200) was selected to ensure adequate statistical power to identify the statistical significance of policy-relevant differences in testing uptake between study arms. We expect testing rates in Arm 3 to range from 25% among porters (as in our preliminary data) to 40% among barworkers (lower than the 59% in our preliminary data where barworkers were enrolled at a health facility).<sup>20</sup> Assuming an equal split between study arms, 400 participants per arm yield 65-72% power to detect a difference of 10 percentage points, 94-96% power for a difference of 15 points and >99% power for difference of 20 percentage points between the targeted, respectively enhanced, arms and the comparison arm (alpha=0.05, two-sided).

## Reporting of results

Methods and results will be reported in accordance with the *CONSORT* reporting guidelines and its extensions for pragmatic randomized controlled trials (**see Supplemental File**).<sup>58</sup>

## Data security and confidentiality

A research data security plan (RDSP) will ensure that data are kept in compliance with relevant privacy regulations, including HIPAA; access to identifying information will be strictly limited.

1  
2  
3 Study personnel will be instructed to keep the identity of all research subjects confidential and  
4  
5 will sign confidentiality agreements.  
6  
7

### 8 **Monitoring and quality assurance**

9

10  
11 Adherence to intervention protocols and the completeness and quality of study data will be  
12  
13 continuously monitored by the principal investigators and a study monitor. Electronic data  
14  
15 capture on tablet devices and daily uploads to secure servers allow for the continuous  
16  
17 monitoring of study activities in near real time. All paper documents will be scanned. Rigorous  
18  
19 quality assurance / quality control procedures will be established, including interviewer  
20  
21 observation, validation and range checks during data entry, verification of entered data, and the  
22  
23 monitoring of time stamps for DCE choice tasks.  
24  
25  
26  
27  
28  
29

### 30 **Discussion**

31  
32  
33

34 This study will evaluate whether an HIV testing intervention, which is uniquely designed using  
35  
36 data from a DCE and explicitly targets preference heterogeneity, will improve testing uptake. If  
37  
38 testing rates differ between study arms, the results will support our hypothesis that DCE-derived  
39  
40 preference data can be used to systematically design HIV testing interventions that target  
41  
42 heterogeneous preferences among and within high-risk populations, and that offering such  
43  
44 interventions will increase testing uptake in target populations. With novel approaches to testing  
45  
46 urgently needed to reach the 90-90-90 targets, the DCE and targeted methods used in this  
47  
48 study may be broadly used to develop cost-effective testing offers that match the preferences of  
49  
50 high-risk populations across diverse settings.  
51  
52  
53  
54  
55  
56  
57  
58  
59  
60

1  
2  
3 To our knowledge this is the first PRCT in which the intervention conditions are designed using  
4 data from a DCE, and the first PRCT that evaluates an intervention explicitly targeting  
5 preference heterogeneity. If successful, the methods used to understand how different groups of  
6 users value key characteristics of a health intervention can readily be applied to other settings in  
7 which interventions are being developed or adapted to optimize their efficacy. This work may  
8 demonstrate the utility of DCEs as a tool in implementation research to replace the costly  
9 practice of iteratively evaluating narrowly focused interventions. Thus, even as we apply this  
10 approach to the specific area of HIV testing, the study has potential to significantly advance the  
11 fields of patient-oriented research and implementation science. The methods could be used to  
12 develop new approaches to adapt effective interventions to local contexts, by informing a priori  
13 which interventions should be rolled out, and with which modifications, in order to maximize  
14 uptake across different populations and sub-populations.  
15  
16  
17  
18  
19  
20  
21  
22  
23  
24  
25  
26  
27  
28

29 Our study design and implementation approach have several unique components. First, the  
30 implementation of the study, in collaboration with all HCT providers in the study area, allows for  
31 the evaluation of testing uptake in a nearly closed system. Second, the use of an automated  
32 mHealth system to send large numbers of SMS messages according to pre-specified algorithms  
33 reduces both error potential and cost. Third, the similarity between HIV testing options given to  
34 participants and hypothetical choice scenarios presented in the DCE allows for explicit  
35 comparisons between stated and revealed preferences. Fourth, the study design allows for  
36 separate estimates of the effects of reminder SMS, the issuance of physical HIV testing  
37 invitation cards, and an incentive offer, on HIV testing rates. Finally, the approach for identifying  
38 the targeted, enhanced, and less-preferred options is not contingent on the use of SALC  
39 analysis and Latent Gold proprietary software; instead it can be approximated using open  
40 source alternatives e.g., in R. In a sensitivity analysis we will evaluate the effect of specific  
41 assumptions on the selection of testing options for the PRCT.  
42  
43  
44  
45  
46  
47  
48  
49  
50  
51  
52  
53  
54  
55  
56  
57  
58  
59  
60



1  
2  
3 The study is subject to several limitations, although some of these are specific to our particular  
4 application and are not necessarily limitations of the DCE-informed approach in general. First,  
5 feasibility considerations limit the study area to include only HCT facilities in Moshi municipality,  
6 and testing uptake will be measured using a combination of provider documentation and self-  
7 report. While coded invitation cards collected from all HCT providers offer definitive evidence of  
8 a completed HIV test, participants may test without invitation cards, and may test outside the  
9 study area. Phone-based follow-up surveys will assess overlap between provider  
10 documentation and participant reports of testing and the extent to which participants test outside  
11 the study area. Second, study eligibility criteria include literacy, and study procedures involve  
12 phone- and SMS-based contact with participants. While literacy in the region was 94.4% in  
13 2000, and, in 2017, 93% of urban households had a mobile phone,<sup>59-61</sup> the exclusion of illiterate  
14 persons and limited mobile phone access may influence the results. Third, multiple follow-up  
15 assessments increase the potential for loss-to-follow-up; sensitivity analyses will be conducted  
16 to describe the effects of selection bias on estimates. Finally, DCE surveys contain a limited set  
17 of testing characteristics; the finite range of attributes and levels is a limitation of DCEs in  
18 general. Preference- and choice-relevant testing characteristics may differ in other settings, and  
19 changes in the testing environment and available testing options may occur during the study  
20 period. While adaptations to the preference survey and analysis of DCE data may be necessary  
21 and require technical expertise, such costs are expected to be far smaller than costs associated  
22 with large-scale, iterative trials of potentially ineffective HCT testing interventions.

23  
24  
25  
26  
27  
28  
29  
30  
31  
32  
33  
34  
35  
36  
37  
38  
39  
40  
41  
42  
43  
44  
45  
46 In conclusion, this study evaluates the critical link between preference-based intervention  
47 design and efficacy. If the PRCT indicates that a preference-informed, heterogeneity-focused  
48 HCT offer increases testing rates, the testing options evaluated in this study can be offered to  
49 high-risk populations in the study area, and the preference elicitation method and tools can be  
50  
51  
52  
53  
54  
55  
56  
57  
58  
59  
60

1  
2  
3 used to inform the design of testing options that better match the preferences of other high-risk  
4  
5 populations, both locally and in other settings.  
6  
7  
8  
9

## 10 11 **Declarations**

### 12 13 14 15 **Ethics approvals**

16  
17  
18  
19 The protocol was registered in ClinicalTrials.gov (Protocol NCT02714140) on March 21, 2016.  
20  
21 The protocol was approved by the Institutional Review Boards at Duke University (Duke Health  
22  
23 IRB, Protocol Pro00075996, version 7, 16-Dec-2019) and the University of South Carolina  
24  
25 (Health Sciences South Carolina IRB, facilitated review, Pro00060760) in the United States; as  
26  
27 well as the Ethics Review Committee at Kilimanjaro Christian Medical University College  
28  
29 (Protocol #901), the National Institute for Medical Research (NIMR/HQ/R.8a/Vol. IX/2603), and  
30  
31 the Tanzania Food & Drugs Authority (now Tanzania Medical Devices Administration,  
32  
33 Authorization No. TZ18CT0017) in Tanzania. Protocol amendments will be submitted to these  
34  
35 entities as required.  
36  
37  
38

### 39 40 **Patient and public involvement**

41  
42  
43 Focus group discussions with members of the target populations will be used to prioritize HIV  
44  
45 testing features with respect to their expected influence on HIV testing decisions, and to  
46  
47 establish levels of features that represent plausible trade-offs in actual or hypothetical HIV  
48  
49 testing interventions. The results will inform the development of the DCE and the testing options  
50  
51 in the PRCT.  
52  
53  
54  
55  
56  
57  
58  
59  
60

## Data availability

Findings from this study will be published in peer-reviewed journals. Data from the proposed study will be stored in a data repository; these data will be de-identified so that they cannot be linked back to individuals. Investigators wishing to use study data to answer new research questions may submit data analysis concept proposals for consideration by the Principal Investigators. The Principal Investigators will review the proposal and will provide those submitting scientifically rigorous and promising proposals access to the data repository to address their research questions.

## Consent for publication

All authors of the manuscript have read and agreed to its content and are accountable for all aspects of the accuracy and integrity of the manuscript in accordance with ICMJE criteria.

## Competing interests

The authors declare that they have no competing interests.

## Funding

This study is supported by a grant from the National Institute of Mental Health (R01MH106388). The funding body has no role in the design of the study, the collection, analysis, and interpretation of data, or writing of the manuscript.

## Authors' contributions

JO, NT, and BN conceptualized the study. AH, AM, BF, BN, DB, JO, and NT were involved in the development and submission of the funding application. All authors contributed to the

1  
2  
3 development of the study protocol. JO and NT contributed equally to the development of this  
4 manuscript, wrote the first draft of the manuscript, and led subsequent revisions. AH, AM, AS,  
5 BF, BN, DB, JO, MM, MZ, NT, and TM read the manuscript and provided critical input. All  
6 authors read and approved the final manuscript.  
7  
8  
9  
10

## 11 **Acknowledgements**

12  
13  
14  
15  
16 The authors are grateful to the study participants and to the study research assistants,  
17 Honoratha Israel, Beatrice Mandao, Elizabeth Mbuya, Yombya Madukwa, Leonia Rugalabamu,  
18 Suzan Kitomari, Stanny Komu, Blandina Zenze, Mohamed Mcharo, Upendo Nnko, Stephen  
19 Sikumbili, Edward Singo, and Beldad Mmari, for input on study procedures and study  
20 implementation.  
21  
22  
23  
24  
25

26  
27 The authors thank the staff of the Kilimanjaro Clinical Research Institute, especially Prof.  
28 Blandina Mmbaga and Zuhura Lintu; the University of South Carolina's Arnold School of Public  
29 Health, especially the Department of Health Services Policy & Management and the Center for  
30 Health Care Quality; the Duke Global Health Institute and Duke University's Center for Health  
31 Policy and Inequalities Research, for administrative support; and members of the Duke Center  
32 for AIDS Research and the study's Scientific Advisory Board for feedback on study feasibility,  
33 design, analytic methods, and implementation.  
34  
35  
36  
37  
38  
39  
40  
41  
42

43 Finally, the authors acknowledge Dr. Credianus Mgimba (Regional Medical Officer, Kilimanjaro  
44 Region), Dr. Best Magoma (former Regional Medical Officer, Kilimanjaro Region), Dr. Eligy  
45 Mosille (Regional AIDS Control Coordinator, Kilimanjaro Region), Ms. Dafrosa Itemba (Director,  
46 Tanzania Women Research Foundation), and members of the Moshi District Council  
47 administration, for their support of the study's development and implementation.  
48  
49  
50  
51  
52  
53  
54  
55  
56  
57  
58  
59  
60

## List of abbreviations

|          |                                                              |
|----------|--------------------------------------------------------------|
| CTCs     | HIV care and treatment centres                               |
| CFTs     | Conditional financial transfers                              |
| DCE      | Discrete choice experiment                                   |
| FBW      | Female barworkers                                            |
| FGD      | Focus group discussion                                       |
| FU       | Follow-up                                                    |
| HCT      | HIV counseling and testing                                   |
| HIV      | Human Immunodeficiency Virus                                 |
| HSHSP-IV | Tanzania's 2017-22 Health Sector HIV and AIDS Strategic Plan |
| IRB      | Institutional Review Board                                   |
| KCRI     | Kilimanjaro Clinical Research Institute                      |
| KMP      | Kilimanjaro mountain porters                                 |
| LMICs    | Low- and middle-income countries                             |
| mHealth  | Mobile health                                                |
| mParis   | Mobile phone assisted reminder and incentive system          |
| NIMR     | National Institute for Medical Research                      |
| PLWH     | Persons living with HIV                                      |
| PRCT     | Pragmatic randomized controlled trial                        |
| SALC     | Scale adjusted latent class                                  |
| SMS      | Short messaging system (text messages)                       |
| UNAIDS   | Joint United Nations Programme on HIV and AIDS               |

**Table 1. HIV testing options offered across the three study arms in the pragmatic randomized controlled trial**

| Arm      | Offers                   | Description                                                                                                                                                                                             |
|----------|--------------------------|---------------------------------------------------------------------------------------------------------------------------------------------------------------------------------------------------------|
| <b>1</b> | 1 common option          | Combines the on average most preferred levels of each attribute included in the DCE, as described by the mean parameter estimates from the mixed logit model.                                           |
|          | 3 targeted options       | Comprise features <i>widely available</i> in the study area and are predicted to be jointly more-preferred than the common option by the largest possible share of participants.                        |
| <b>2</b> | 1 common option          | Combines the on average most preferred levels of each attribute included in the DCE, as described by the mean parameter estimates from the mixed logit model.                                           |
|          | 3 enhanced options       | Include additional features that are <i>not yet widely available</i> in the study area and predicted to be jointly more-preferred than the common option by the largest possible share of participants. |
| <b>3</b> | 1 common option          | Combines the on average most preferred levels of each attribute included in the DCE, as described by the mean parameter estimates from the mixed logit model.                                           |
|          | 3 less preferred options | Includes options that are widely available in the study area and jointly predicted to be equally or less-preferred than the common option by the largest possible share of participants.                |

**Table 2. Schedule of activities**

| Phase                | Time point        | Target timing         | Key activity                                       | Key information collected                                            |
|----------------------|-------------------|-----------------------|----------------------------------------------------|----------------------------------------------------------------------|
| <b>A</b>             | $t_A$             | Enrollment            | Baseline survey                                    | HIV testing preferences, history, HIV risk, socio-demographics       |
|                      | $t_{Afu} = t_B^*$ | $t_A + 91$ days       | Phone-based FU                                     | HIV testing uptake since $t_A$                                       |
| <b>B</b>             | $t_{Bs}$          | $t_B + 28$ days       | SMS reminder                                       |                                                                      |
|                      | $t_{Bfu}$         | $t_B + 91$ days       | Phone-based FU                                     | HIV testing uptake since $t_B$                                       |
| <b>C<sup>#</sup></b> | $t_{Bx} = t_C$    | $t_{Bfu} + < 91$ days | Testing invitation ("common" option)               |                                                                      |
|                      | $t_{Cs}$          | $t_C + 28$ days       | SMS reminder                                       |                                                                      |
|                      | $t_{Cfu}$         | $t_C + 91$ days       | Card collection from testing sites, phone-based FU | HIV testing uptake since $t_C$                                       |
| <b>D<sup>#</sup></b> | $t_{Cx} = t_D$    | $t_{Cfu} + < 91$ days | 4 testing invitations, study arm specific          |                                                                      |
|                      | $t_{Ds}$          | $t_D + 28$ days       | SMS reminder                                       |                                                                      |
|                      | $t_{Dfu}$         | $t_D + 91$ days       | Card collection from testing sites, phone-based FU | HIV testing uptake since $t_D$                                       |
| <b>E</b>             | $t_E$             | $t_{Dfu} + < 91$ days | Phone call and SMS message with incentive offer    |                                                                      |
|                      | $t_{Es}$          | $t_D + 28$ days       | SMS reminder                                       |                                                                      |
|                      | $t_{Efu}$         | $t_E + 91$ days       | Card collection from testing sites, phone-based FU | Choice among testing options offered, HIV testing uptake since $t_E$ |

\* The phone-based follow-up at the end of Phase A constitutes the beginning of phase B

# To reduce variability across participants in the timing of Phase D, some participants may be enrolled directly into Phases C and D. FU: follow-up

## References

1. UNAIDS. UNAIDS Data 2019. 2019.
2. Sweat M, Gregorich S, Sangiwa G, et al. Cost-effectiveness of voluntary HIV-1 counselling and testing in reducing sexual transmission of HIV-1 in Kenya and Tanzania. *Lancet*. 2000;356(9224):113-121.
3. Thielman NM, Chu HY, Ostermann J, et al. Cost-effectiveness of free HIV voluntary counseling and testing through a community-based AIDS service organization in Northern Tanzania. *Am J Public Health*. 2006;96(1):114-119.
4. Dieffenbach CW, Fauci AS. Universal voluntary testing and treatment for prevention of HIV transmission. *JAMA*. 2009;301(22):2380-2382.
5. Cohen MS, Chen YQ, McCauley M, et al. Prevention of HIV-1 infection with early antiretroviral therapy. *N Engl J Med*. 2011;365(6):493-505.
6. Fauci AS, Folkers GK, Dieffenbach CW. Hiv-Aids: Much Accomplished, Much to Do. *Nat Immunol*. 2013;14(11):1104-1107.
7. UNAIDS. 90-90-90. An ambitious treatment target to help end the AIDS epidemic. 2014; [http://www.unaids.org/sites/default/files/media\\_asset/90-90-90\\_en.pdf](http://www.unaids.org/sites/default/files/media_asset/90-90-90_en.pdf). Accessed August 7, 2018.
8. The Lancet Editors. Divergent paths to the end of AIDS. *Lancet HIV*. 2017;4(9):e375.
9. Granich RM, Gilks CF, Dye C, De Cock KM, Williams BG. Universal voluntary HIV testing with immediate antiretroviral therapy as a strategy for elimination of HIV transmission: a mathematical model. *Lancet*. 2009;373(9657):48-57.
10. National AIDS Control Programme MoH, Community Development, Gender, Elderly and Children. Health Sector HIV and AIDS Strategic Plan (HSHSP Iv) 2017–2022. 2017.



- 1  
2  
3 11. Angotti N, Bula A, Gaydos L, Kimchi EZ, Thornton RL, Yeatman SE. Increasing the  
4 acceptability of HIV counseling and testing with three C's: Convenience, confidentiality  
5 and credibility. *Soc Sci Med*. 2009;68(12):2263-2270.  
6  
7
- 8  
9 12. Negin J, Wariero J, Mutuo P, Jan S, Pronyk P. Feasibility, acceptability and cost of  
10 home-based HIV testing in rural Kenya. *Trop Med Int Health*. 2009;14(8):849-855.  
11  
12
- 13 13. Sabapathy K, Van den Bergh R, Fidler S, Hayes R, Ford N. Uptake of Home-Based  
14 Voluntary HIV Testing in Sub-Saharan Africa: A Systematic Review and Meta-Analysis.  
15 *PLoS Med*. 2012;9(12):e1001351.  
16  
17
- 18  
19 14. Baggaley R, Hensen B, Ajose O, et al. From caution to urgency: the evolution of HIV  
20 testing and counselling in Africa. *Bull World Health Organ*. 2012;90(9):652-658B.  
21  
22
- 23 15. Roura M, Watson-Jones D, Kahawita TM, Ferguson L, Ross DA. Provider-initiated  
24 testing and counselling programmes in sub-Saharan Africa: a systematic review of their  
25 operational implementation. *AIDS*. 2013;27(4):617-626.  
26  
27
- 28  
29 16. Topp SM, Chipukuma JM, Chiko MM, Wamulume CS, Bolton-Moore C, Reid SE. Opt-  
30 out provider-initiated HIV testing and counselling in primary care outpatient clinics in  
31 Zambia. *Bull World Health Organ*. 2011;89(5):328-335A.  
32  
33
- 34 17. Wanyenze R, Kanya M, Liechty CA, et al. HIV counseling and testing practices at an  
35 urban hospital in Kampala, Uganda. *AIDS and Behavior*. 2006;10(4):361-367.  
36  
37
- 38  
39 18. Corbett EL, Marston B, Churchyard GJ, De Cock KM. Tuberculosis in sub-Saharan  
40 Africa: opportunities, challenges, and change in the era of antiretroviral treatment.  
41 *Lancet*. 2006;367(9514):926-937.  
42  
43
- 44 19. Houdmont J, Munir F, Grey M. Acceptance of repeat worksite HIV voluntary counselling  
45 and testing in a rural South African factory. *AIDS care*. 2013;25(9):1199-1202.  
46  
47
- 48  
49 20. Ostermann J, Njau B, Mtuy T, Brown DS, Muhlbacher A, Thielman N. One size does not  
50 fit all: HIV testing preferences differ among high-risk groups in Northern Tanzania. *AIDS*  
51 *care*. 2015;27(5):595-603.  
52  
53  
54  
55  
56  
57  
58  
59

- 1  
2  
3 21. Ostermann J, Njau B, Brown DS, Muhlbacher A, Thielman N. Heterogeneous HIV  
4 testing preferences in an urban setting in Tanzania: results from a discrete choice  
5 experiment. *PloS one*. 2014;9(3):e92100.  
6  
7
- 8  
9 22. Njau B, Ostermann J, Brown D, Muhlbacher A, Reddy E, Thielman N. HIV testing  
10 preferences in Tanzania: a qualitative exploration of the importance of confidentiality,  
11 accessibility, and quality of service. *BMC public health*. 2014;14:838.  
12  
13
- 14  
15 23. Muhlbacher A, Johnson FR. Choice Experiments to Quantify Preferences for Health and  
16 Healthcare: State of the Practice. *Appl Health Econ Health Policy*. 2016;14(3):253-266.  
17  
18
- 19  
20 24. Hensher DA, Rose JM, Greene WH. *Applied choice analysis : a primer*. Cambridge ;  
21 New York: Cambridge University Press; 2005.  
22  
23
- 24  
25 25. Louviere JJ, Hensher DA, Swait JD. *Stated choice methods : analysis and applications*.  
26 Cambridge, UK ; New York, NY, USA: Cambridge University Press; 2000.  
27
- 28  
29 26. Ryan M, Gerard K, Amaya-Amaya M. *Using discrete choice experiments to value health  
30 and health care*. Dordrecht, The Netherlands: Springer; 2008.  
31
- 32  
33 27. Ryan M, Farrar S. Using conjoint analysis to elicit preferences for health care. *Brit Med  
34 J*. 2000;320(7248):1530-1533.  
35  
36
- 37  
38 28. Johnson FR, Ozdemir S, Phillips KA. Effects of simplifying choice tasks on estimates of  
39 taste heterogeneity in stated-choice surveys. *Soc Sci Med*. 2010;70(2):183-190.  
40
- 41  
42 29. Indravudh PP, Sibanda EL, d'Elbee M, et al. 'I will choose when to test, where I want to  
43 test': investigating young people's preferences for HIV self-testing in Malawi and  
44 Zimbabwe. *AIDS*. 2017;31 Suppl 3:S203-S212.  
45  
46
- 47  
48 30. Phillips KA, Maddala T, Johnson FR. Measuring preferences for health care  
49 interventions using conjoint analysis: an application to HIV testing. *Health Serv Res*.  
50 2002;37(6):1681-1705.  
51  
52  
53  
54  
55  
56  
57  
58  
59  
60

- 1
- 2
- 3 31. Strauss M, George GL, Rhodes BD. Determining Preferences Related to HIV
- 4 Counselling and Testing Services Among High School Learners in KwaZulu-Natal: A
- 5 Discrete Choice Experiment. *AIDS Behav.* 2018;22(1):64-76.
- 6
- 7
- 8
- 9 32. Ostermann J, Njau B, Brown DS, Mühlbacher A, Thielman N. Heterogeneous HIV
- 10 Testing Preferences in an Urban Setting in Tanzania: Results from a Discrete Choice
- 11 Experiment. *PLoS one.* 2014;9(3):e92100.
- 12
- 13
- 14
- 15 33. Quaife M, Eakle R, Cabrera Escobar MA, et al. Divergent Preferences for HIV
- 16 Prevention: A Discrete Choice Experiment for Multipurpose HIV Prevention Products in
- 17 South Africa. *Med Decis Making.* 2018;38(1):120-133.
- 18
- 19
- 20
- 21 34. Cameron MP, Newman PA, Rongprakhon S, Scarpa R. The marginal willingness-to-
- 22 pay for attributes of a hypothetical HIV vaccine. *Vaccine.* 2013;31(36):3712-3717.
- 23
- 24
- 25 35. Newman PA, Cameron MP, Rongprakhon S, Tepjan S, Scarpa R. Acceptability and
- 26 Preferences for Hypothetical Rectal Microbicides among a Community Sample of Young
- 27 Men Who Have Sex with Men and Transgender Women in Thailand: A Discrete Choice
- 28 Experiment. *AIDS Behav.* 2016;20(11):2588-2601.
- 29
- 30
- 31
- 32
- 33 36. Terris-Prestholt F, Hanson K, MacPhail C, Vickerman P, Rees H, Watts C. How Much
- 34 Demand for New HIV Prevention Technologies Can We Really Expect? Results from a
- 35 Discrete Choice Experiment in South Africa. *PLoS one.* 2013;8(12).
- 36
- 37
- 38
- 39 37. Zanolini A, Sikombe K, Sikazwe I, et al. Understanding preferences for HIV care and
- 40 treatment in Zambia: Evidence from a discrete choice experiment among patients who
- 41 have been lost to follow-up. *PLoS Med.* 2018;15(8):e1002636.
- 42
- 43
- 44
- 45 38. Kruk ME, Riley PL, Palma AM, et al. How Can the Health System Retain Women in HIV
- 46 Treatment for a Lifetime? A Discrete Choice Experiment in Ethiopia and Mozambique.
- 47 *PLoS one.* 2016;11(8):e0160764.
- 48
- 49
- 50
- 51 39. d'Elbee M, Indravudh PP, Mwenge L, et al. Preferences for linkage to HIV care services
- 52 following a reactive self-test: discrete choice experiments in Malawi and Zambia. *AIDS.*
- 53 2018;32(14):2043-2049.
- 54
- 55
- 56
- 57
- 58
- 59
- 60

- 1  
2  
3 40. Beusterien KM, Dziekan K, Schrader S, et al. Patient preferences among third agent HIV  
4 medications: a US and German perspective. *AIDS care*. 2007;19(8):982-988.  
5  
6  
7 41. Bregigeon-Ronot S, Cheret A, Cabie A, et al. Evaluating patient preference and  
8 satisfaction for human immunodeficiency virus therapy in France. *Patient Prefer*  
9 *Adherence*. 2017;11:1159-1169.  
10  
11  
12  
13 42. Hauber AB, Mohamed AF, Watson ME, Johnson FR, Hernandez JE. Benefits, risk, and  
14 uncertainty: preferences of antiretroviral-naive African Americans for HIV treatments.  
15 *AIDS Patient Care STDS*. 2009;23(1):29-34.  
16  
17  
18  
19 43. Mühlbacher AC, Stoll M, Mahlich J, Nübling M. Patient preferences for HIV/AIDS therapy  
20 - a discrete choice experiment. *Health Econ Rev*. 2013;3(1):14.  
21  
22  
23  
24 44. United Republic of Tanzania, National Bureau of Statistics. 2012 Tanzania Population  
25 and Housing Census. 2012;  
26 [https://www.nbs.go.tz/nbs/takwimu/census2012/Tanzania\\_Total\\_Population\\_by\\_District-](https://www.nbs.go.tz/nbs/takwimu/census2012/Tanzania_Total_Population_by_District-Regions-2016_2017r.pdf)  
27 [Regions-2016\\_2017r.pdf](https://www.nbs.go.tz/nbs/takwimu/census2012/Tanzania_Total_Population_by_District-Regions-2016_2017r.pdf). Accessed December 1, 2019.  
28  
29  
30  
31 45. Ostermann J, Whetten K, Reddy E, et al. Treatment retention and care transitions during  
32 and after the scale-up of HIV care and treatment in Northern Tanzania. *AIDS care*.  
33 2014;26(11):1352-1358.  
34  
35  
36  
37 46. Mitchell J, Keane J, Laidlaw J. Making success work for the poor: Package tourism in  
38 Northern Tanzania. Arusha, Tanzania: Overseas Development Institute, SNV  
39 Connecting People's Capacities;2009.  
40  
41  
42  
43 47. Peaty D. Kilimanjaro Tourism and What It Means for Local Porters and for the Local  
44 Environment. *Journal of Ritsumeikan Social Sciences and Humanities*. 2012;4:1-12.  
45  
46  
47  
48 48. Lancsar E, Louviere J. Conducting discrete choice experiments to inform healthcare  
49 decision making: a user's guide. *Pharmacoeconomics*. 2008;26(8):661-677.  
50  
51  
52 49. Johnson F, Kanninen B, Bingham M, Özdemir S. Experimental design for stated choice  
53 studies. In: BJ K, ed. *Valuing environmental amenities using stated choice studies*.  
54 Dordrecht: Springer; 2007.  
55  
56  
57  
58  
59  
60

- 1  
2  
3 50. Hole AR. Fitting mixed logit models by using maximum simulated likelihood. *The Stata*  
4 *Journal*. 2007;7(3):388-401.  
5  
6  
7 51. Hensher DA, Rose JM, Greene WH. *Applied choice analysis*. 2nd edition. ed.  
8 Cambridge: Cambridge University Press; 2015.  
9  
10  
11 52. Ostermann J, Vasudevan L, Van Zwetselaar M, Moses S, Engadaya E, Mfinanga S.  
12 Mobile Phone Assisted Reminder and Incentive System (mParis). Integrating mHealth  
13 reminders and conditional cash transfers to improve the timeliness of vaccinations in  
14 Tanzania. Poster presented at 2018 NIH mHealth Technology Showcase for Health  
15 Research; 2018; Washington, D.C.  
16  
17  
18 53. Ostermann J, Vasudevan L, Baumgartner JN, Ngadaya E, Mfinanga SG. Do mobile  
19 phone-based reminders and conditional financial transfers improve the timeliness of  
20 childhood vaccinations in Tanzania? Study protocol for a quasi-randomized controlled  
21 trial. *Trials*. 2019;20(1):397.  
22  
23  
24 54. Ostermann J, Brown DS, Muhlbacher A, Njau B, Thielman N. Would you test for 5000  
25 Shillings? HIV risk and willingness to accept HIV testing in Tanzania. *Health Econ Rev*.  
26 2015;5(1):60.  
27  
28  
29 55. Ministry of Health Community Development Gender Elderly and Children. National AIDS  
30 Control Programme. Health Sector HIV and AIDS Strategic Plan (HSHSP IV) 2017–  
31 2022. 2017; <http://www.nacp.go.tz/site/news/HSHSPIV.pdf>. Accessed July 11, 2018.  
32  
33  
34 56. Yang JC, Johnson FR, Kilambi V, Mohamed AF. Sample size and utility-difference  
35 precision in discrete-choice experiments: A meta-simulation approach. *J Choice Model*.  
36 2015;16:50-57.  
37  
38  
39 57. Orme B. *Getting Started with Conjoint Analysis: Strategies for Product Design and*  
40 *Pricing Research*. 2nd ed. Madison, Wis: Research Publishers LLC; 2010.  
41  
42  
43 58. Zwarenstein M, Treweek S, Gagnier JJ, et al. Improving the reporting of pragmatic trials:  
44 an extension of the CONSORT statement. *BMJ*. 2008;337:a2390.  
45  
46  
47  
48  
49  
50  
51  
52  
53  
54  
55  
56  
57  
58  
59  
60

- 1  
2  
3 59. National Bureau of Statistics, (OCGS) OotCGS. National Population Projections. 2018;  
4 <http://www.nbs.go.tz/nbs/takwimu/census2012/Projection-Report-20132035.pdf>.  
5  
6 Accessed August 22, 2018.  
7  
8  
9 60. Tanzania Communications Regulatory Authority. Quarterly Communications Statistics.  
10 2018;  
11 [https://www.tcra.go.tz/images/documents/reports/TelCom\\_Statistics\\_June\\_2018.pdf](https://www.tcra.go.tz/images/documents/reports/TelCom_Statistics_June_2018.pdf).  
12  
13 Accessed August 22, 2018.  
14  
15  
16 61. Ministry of Health Community Development Gender Elderly and Children (MoHCDGEC)  
17 [Tanzania Mainland], Ministry of Health (MoH) [Zanzibar], National Bureau of Statistics  
18 (NBS), Office of the Chief Government Statistician (OCGS), ICF. TANZANIA. Malaria  
19 Indicator Survey 2017. 2017; <https://www.dhsprogram.com/pubs/pdf/MIS31/MIS31.pdf>.  
20  
21 Accessed April 29, 2019.  
22  
23  
24  
25  
26  
27  
28  
29  
30  
31  
32  
33  
34  
35  
36  
37  
38  
39  
40  
41  
42  
43  
44  
45  
46  
47  
48  
49  
50  
51  
52  
53  
54  
55  
56  
57  
58  
59  
60

1  
2  
3  
4  
5  
6  
7  
8  
9  
10  
11  
12  
13  
14  
15  
16  
17  
18  
19  
20  
21  
22  
23  
24  
25  
26  
27  
28  
29  
30  
31  
32  
33  
34  
35  
36  
37  
38  
39  
40  
41  
42  
43  
44  
45  
46  
47  
48  
49  
50  
51  
52  
53  
54  
55  
56  
57  
58  
59  
60

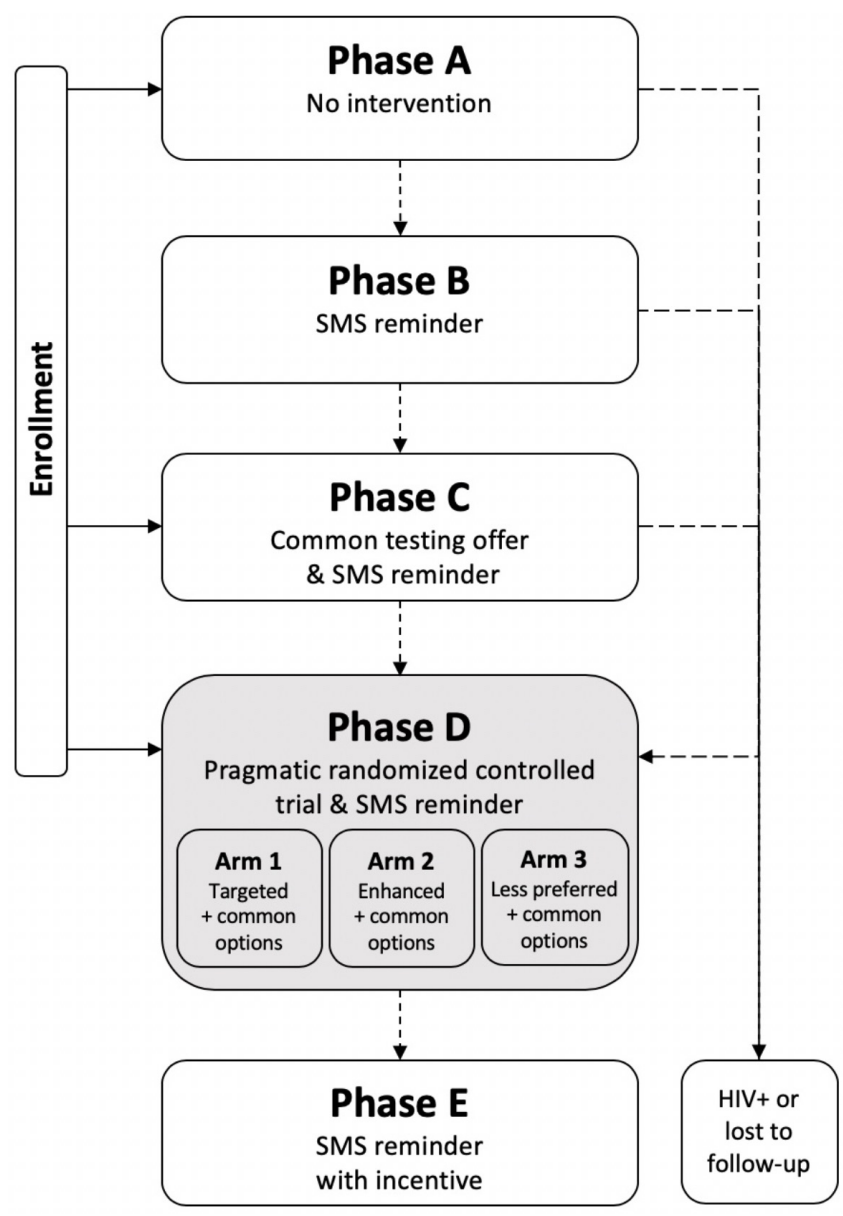

Figure 1. Study design

205x294mm (144 x 144 DPI)

**Supplementary Table S1. CONSORT checklist for pragmatic randomized controlled trials**

| SECTION and topic   | Item # | Descriptor <sup>1</sup>                                                                                                                                                                                                                                                                                                                                                                                                                | Reported on page # |
|---------------------|--------|----------------------------------------------------------------------------------------------------------------------------------------------------------------------------------------------------------------------------------------------------------------------------------------------------------------------------------------------------------------------------------------------------------------------------------------|--------------------|
| TITLE & ABSTRACT    | 1      | How participants were allocated to interventions (e.g., "random allocation", "randomized", or "randomly assigned").                                                                                                                                                                                                                                                                                                                    | 2                  |
| <b>INTRODUCTION</b> |        |                                                                                                                                                                                                                                                                                                                                                                                                                                        |                    |
| Background          | 2      | Scientific background and explanation of rationale.<br><br><b>EXT:</b> Describe the health or health service problem that the intervention is intended to address and other interventions that may commonly be aimed at this problem.                                                                                                                                                                                                  | 5                  |
| <b>METHODS</b>      |        |                                                                                                                                                                                                                                                                                                                                                                                                                                        |                    |
| Participants        | 3      | Eligibility criteria for participants and the settings and locations where the data were collected.<br><br><b>EXT:</b> Eligibility criteria should be explicitly framed to show the degree to which they include typical participants and/or, where applicable, typical providers (eg, nurses), institutions (eg, hospitals), communities (or localities eg, towns) and settings of care (eg, different healthcare financing systems). | 7                  |



| SECTION and topic | Item # | Descriptor <sup>1</sup>                                                                                                                                                                                                                                                                                                                                                                                                                                                                                 | Reported on page # |
|-------------------|--------|---------------------------------------------------------------------------------------------------------------------------------------------------------------------------------------------------------------------------------------------------------------------------------------------------------------------------------------------------------------------------------------------------------------------------------------------------------------------------------------------------------|--------------------|
| Interventions     | 4      | <p>Precise details of the interventions intended for each group and how and when they were actually administered.</p> <p><b>EXT:</b> Describe extra resources added to (or resources removed from) usual settings in order to implement intervention. Indicate if efforts were made to standardise the intervention or if the intervention and its delivery were allowed to vary between participants, practitioners, or study sites. Describe the comparator in similar detail to the intervention</p> | 8, 11              |
| Objectives        | 5      | Specific objectives and hypotheses.                                                                                                                                                                                                                                                                                                                                                                                                                                                                     | 7                  |
| Outcomes          | 6      | <p>Clearly defined primary and secondary outcome measures and, when applicable, any methods used to enhance the quality of measurements (e.g., multiple observations, training of assessors).</p> <p><b>EXT:</b> Explain why the chosen outcomes and, when relevant, the length of follow-up are considered important to those who will use the results of the trial</p>                                                                                                                                | 5, 20              |
| Sample size       | 7      | <p>How sample size was determined and, when applicable, explanation of any interim analyses and stopping rules.</p> <p><b>EXT:</b> If calculated using the smallest difference considered important by the target decision maker audience (the minimally important difference) then report where this difference was obtained</p>                                                                                                                                                                       | 19                 |

| SECTION and topic      | Item # | Descriptor <sup>1</sup>                                                                                                                                                                                                                                                  | Reported on page # |
|------------------------|--------|--------------------------------------------------------------------------------------------------------------------------------------------------------------------------------------------------------------------------------------------------------------------------|--------------------|
| Randomization:         |        |                                                                                                                                                                                                                                                                          |                    |
| Sequence generation    | 8      | Method used to generate the random allocation sequence, including details of any restriction (e.g., blocking, stratification).                                                                                                                                           | 10                 |
| Allocation concealment | 9      | Method used to implement the random allocation sequence (e.g., numbered containers or central telephone), clarifying whether the sequence was concealed until interventions were assigned.                                                                               | 10                 |
| Implementation         | 10     | Who generated the allocation sequence, who enrolled participants, and who assigned participants to their groups.                                                                                                                                                         | 10                 |
| Blinding (Masking)     | 11     | Whether or not participants, those administering the interventions, and those assessing the outcomes were blinded to group assignment. If done, how the success of blinding was evaluated.<br><br><b>EXT:</b> If blinding was not done, or was not possible, explain why | 16                 |
| Statistical methods    | 12     | Statistical methods used to compare groups for primary outcome(s); Methods for additional analyses, such as subgroup analyses and adjusted analyses.                                                                                                                     | 18                 |
| <b>RESULTS</b>         |        |                                                                                                                                                                                                                                                                          |                    |

| SECTION and topic       | Item # | Descriptor <sup>1</sup>                                                                                                                                                                                                                                                                                                                                                                                                                                                                                                               | Reported on page # |
|-------------------------|--------|---------------------------------------------------------------------------------------------------------------------------------------------------------------------------------------------------------------------------------------------------------------------------------------------------------------------------------------------------------------------------------------------------------------------------------------------------------------------------------------------------------------------------------------|--------------------|
| Participant flow        | 13     | <p>Flow of participants through each stage (a diagram is strongly recommended). Specifically, for each group report the numbers of participants randomly assigned, receiving intended treatment, completing the study protocol, and analyzed for the primary outcome. Describe protocol deviations from study as planned, together with reasons.</p> <p><b>EXT:</b> The number of participants or units approached to take part in the trial, the number which were eligible, and reasons for nonparticipation should be reported</p> | 17                 |
| Recruitment             | 14     | Dates defining the periods of recruitment and follow-up.                                                                                                                                                                                                                                                                                                                                                                                                                                                                              | n/a                |
| Baseline data           | 15     | Baseline demographic and clinical characteristics of each group.                                                                                                                                                                                                                                                                                                                                                                                                                                                                      | n/a                |
| Numbers analyzed        | 16     | Number of participants (denominator) in each group included in each analysis and whether the analysis was by intention-to-treat". State the results in absolute numbers when feasible (e.g., 10/20, not 50%).                                                                                                                                                                                                                                                                                                                         | 15                 |
| Outcomes and Estimation | 17     | For each primary and secondary outcome, a summary of results for each group, and the estimated effect size and its precision (e.g., 95% confidence interval).                                                                                                                                                                                                                                                                                                                                                                         | n/a                |

| SECTION and topic  | Item # | Descriptor <sup>1</sup>                                                                                                                                                                                                                                                                                                | Reported on page # |
|--------------------|--------|------------------------------------------------------------------------------------------------------------------------------------------------------------------------------------------------------------------------------------------------------------------------------------------------------------------------|--------------------|
| Ancillary analyses | 18     | Address multiplicity by reporting any other analyses performed, including subgroup analyses and adjusted analyses, indicating those pre-specified and those exploratory.                                                                                                                                               | n/a                |
| Adverse events     | 19     | All important adverse events or side effects in each intervention group.                                                                                                                                                                                                                                               | n/a                |
| <b>DISCUSSION</b>  |        |                                                                                                                                                                                                                                                                                                                        |                    |
| Interpretation     | 20     | Interpretation of the results, taking into account study hypotheses, sources of potential bias or imprecision and the dangers associated with multiplicity of analyses and outcomes.                                                                                                                                   | n/a                |
| Generalizability   | 21     | Generalizability (external validity) of the trial findings.<br><br><b>EXT:</b> Describe key aspects of the setting which determined the trial results. Discuss possible differences in other settings where clinical traditions, health service organisation, staffing, or resources may vary from those of the trial. | n/a                |
| Overall evidence   | 22     | General interpretation of the results in the context of current evidence.                                                                                                                                                                                                                                              | n/a                |

<sup>1</sup> EXT denotes a pragmatic trial extension of the CONSORT statement.

<https://www.bmj.com/content/bmj/337/bmj.a2390.full.pdf>

**Supplementary Table S2: WHO Trial Registration Data Set**

| <b>Data category</b>                          | <b>Information</b>                                                                                                                                                                                                                                                                                                                                                                                   |
|-----------------------------------------------|------------------------------------------------------------------------------------------------------------------------------------------------------------------------------------------------------------------------------------------------------------------------------------------------------------------------------------------------------------------------------------------------------|
| Primary registry and trial identifying number | ClinicalTrials.gov<br>NCT02714140                                                                                                                                                                                                                                                                                                                                                                    |
| Date of registration in primary registry      | March 21, 2016                                                                                                                                                                                                                                                                                                                                                                                       |
| Secondary identifying numbers                 | N/A                                                                                                                                                                                                                                                                                                                                                                                                  |
| Source of monetary/material support           | National Institute of Mental Health (R01MH106388)<br>6001 Executive Boulevard<br>Bethesda, MD 20892-9663                                                                                                                                                                                                                                                                                             |
| Primary sponsor                               | University of South Carolina, USA                                                                                                                                                                                                                                                                                                                                                                    |
| Secondary sponsor(s)                          | Kilimanjaro Christian Medical Centre, Tanzania                                                                                                                                                                                                                                                                                                                                                       |
| Contact for public queries                    | Jan Ostermann, PhD<br>Ph: 8037778747<br><a href="mailto:jano@mailbox.sc.edu">jano@mailbox.sc.edu</a><br>Nathan Thielman, MD<br>Ph: 9196681721<br><a href="mailto:n.thielman@duke.edu">n.thielman@duke.edu</a>                                                                                                                                                                                        |
| Contact for scientific queries                | Jan Ostermann, PhD<br>Ph: 8037778747<br><a href="mailto:jano@mailbox.sc.edu">jano@mailbox.sc.edu</a><br>Nathan Thielman, MD<br>Ph: 9196681721<br><a href="mailto:n.thielman@duke.edu">n.thielman@duke.edu</a>                                                                                                                                                                                        |
| Public title                                  | Does Preference-based HIV Testing Increase Uptake in High Risk Populations?                                                                                                                                                                                                                                                                                                                          |
| Scientific title                              | Using <u>DCEs</u> to <u>Identify</u> and <u>Match</u> Preferences for HIV/ <u>AIDS</u> <u>Counseling</u> and <u>Testing</u> (DCE-IMPACT)                                                                                                                                                                                                                                                             |
| Countries of recruitment                      | Tanzania                                                                                                                                                                                                                                                                                                                                                                                             |
| Health conditions or problems studied         | HIV, HIV testing                                                                                                                                                                                                                                                                                                                                                                                     |
| Intervention(s)                               | Behavioral: Invitation cards<br>Behavioral: Reminders<br>Behavioral: Conditional economic transfers                                                                                                                                                                                                                                                                                                  |
| Key inclusion and exclusion criteria          | Ages Eligible for Study: 18 Years and older<br>Sexes Eligible for Study: Any<br>Accepts Healthy Volunteers: Yes<br>Inclusion criteria: Women employed in bars, restaurants and guesthouses serving alcohol to patrons ("female barworkers") and male mountain porters who are supporting climbers of nearby Mount Kilimanjaro ("Kilimanjaro mountain porters")<br>Exclusion criteria: Unable to read |
| Study type                                    | Interventional (Clinical Trial)                                                                                                                                                                                                                                                                                                                                                                      |
| Date of first enrolment                       | 12-February-2019                                                                                                                                                                                                                                                                                                                                                                                     |
| Target sample size                            | 1200                                                                                                                                                                                                                                                                                                                                                                                                 |
| Recruitment status                            | Ongoing                                                                                                                                                                                                                                                                                                                                                                                              |
| Primary outcome(s)                            | Uptake of HIV testing                                                                                                                                                                                                                                                                                                                                                                                |
| Key secondary outcomes                        | N/A                                                                                                                                                                                                                                                                                                                                                                                                  |

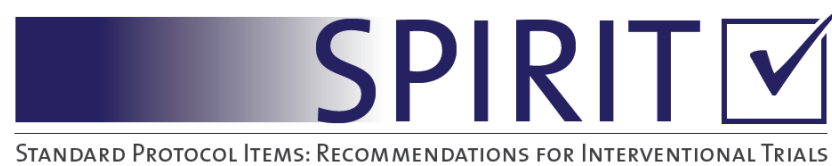

**Supplemental Table S3.** SPIRIT 2013 Checklist: Recommended items to address in a clinical trial protocol and related documents\*

| Section/item                      | Item No | Description                                                                                                                                                                                                                                                                              | Addressed on page number |
|-----------------------------------|---------|------------------------------------------------------------------------------------------------------------------------------------------------------------------------------------------------------------------------------------------------------------------------------------------|--------------------------|
| <b>Administrative information</b> |         |                                                                                                                                                                                                                                                                                          |                          |
| Title                             | 1       | Descriptive title identifying the study design, population, interventions, and, if applicable, trial acronym                                                                                                                                                                             | 1                        |
| Trial registration                | 2a      | Trial identifier and registry name. If not yet registered, name of intended registry                                                                                                                                                                                                     | 23                       |
|                                   | 2b      | All items from the World Health Organization Trial Registration Data Set                                                                                                                                                                                                                 | Supplementary Table S2   |
| Protocol version                  | 3       | Date and version identifier                                                                                                                                                                                                                                                              | 23                       |
| Funding                           | 4       | Sources and types of financial, material, and other support                                                                                                                                                                                                                              | 24                       |
| Roles and responsibilities        | 5a      | Names, affiliations, and roles of protocol contributors                                                                                                                                                                                                                                  | 24                       |
|                                   | 5b      | Name and contact information for the trial sponsor                                                                                                                                                                                                                                       | Supplementary Table S2   |
|                                   | 5c      | Role of study sponsor and funders, if any, in study design; collection, management, analysis, and interpretation of data; writing of the report; and the decision to submit the report for publication, including whether they will have ultimate authority over any of these activities | 24                       |
|                                   | 5d      | Composition, roles, and responsibilities of the coordinating centre, steering committee, endpoint adjudication committee, data management team, and other individuals or groups overseeing the trial, if applicable (see Item 21a for data monitoring committee)                         | N/A                      |

|    |                                                           |     |                                                                                                                                                                                                                                                                                                                                                                                |                      |
|----|-----------------------------------------------------------|-----|--------------------------------------------------------------------------------------------------------------------------------------------------------------------------------------------------------------------------------------------------------------------------------------------------------------------------------------------------------------------------------|----------------------|
| 1  | <b>Introduction</b>                                       |     |                                                                                                                                                                                                                                                                                                                                                                                |                      |
| 2  | Background and rationale                                  | 6a  | Description of research question and justification for undertaking the trial, including summary of relevant studies (published and unpublished) examining benefits and harms for each intervention                                                                                                                                                                             | 5-7                  |
| 3  |                                                           |     |                                                                                                                                                                                                                                                                                                                                                                                |                      |
| 4  |                                                           | 6b  | Explanation for choice of comparators                                                                                                                                                                                                                                                                                                                                          | 8                    |
| 5  |                                                           |     |                                                                                                                                                                                                                                                                                                                                                                                |                      |
| 6  | Objectives                                                | 7   | Specific objectives or hypotheses                                                                                                                                                                                                                                                                                                                                              | 7                    |
| 7  |                                                           |     |                                                                                                                                                                                                                                                                                                                                                                                |                      |
| 8  | Trial design                                              | 8   | Description of trial design including type of trial (eg, parallel group, crossover, factorial, single group), allocation ratio, and framework (eg, superiority, equivalence, noninferiority, exploratory)                                                                                                                                                                      | 8                    |
| 9  |                                                           |     |                                                                                                                                                                                                                                                                                                                                                                                |                      |
| 10 |                                                           |     |                                                                                                                                                                                                                                                                                                                                                                                |                      |
| 11 |                                                           |     |                                                                                                                                                                                                                                                                                                                                                                                |                      |
| 12 |                                                           |     |                                                                                                                                                                                                                                                                                                                                                                                |                      |
| 13 |                                                           |     |                                                                                                                                                                                                                                                                                                                                                                                |                      |
| 14 | <b>Methods: Participants, interventions, and outcomes</b> |     |                                                                                                                                                                                                                                                                                                                                                                                |                      |
| 15 |                                                           |     |                                                                                                                                                                                                                                                                                                                                                                                |                      |
| 16 | Study setting                                             | 9   | Description of study settings (eg, community clinic, academic hospital) and list of countries where data will be collected. Reference to where list of study sites can be obtained                                                                                                                                                                                             | 7                    |
| 17 |                                                           |     |                                                                                                                                                                                                                                                                                                                                                                                |                      |
| 18 |                                                           |     |                                                                                                                                                                                                                                                                                                                                                                                |                      |
| 19 | Eligibility criteria                                      | 10  | Inclusion and exclusion criteria for participants. If applicable, eligibility criteria for study centres and individuals who will perform the interventions (eg, surgeons, psychotherapists)                                                                                                                                                                                   | 7                    |
| 20 |                                                           |     |                                                                                                                                                                                                                                                                                                                                                                                |                      |
| 21 |                                                           |     |                                                                                                                                                                                                                                                                                                                                                                                |                      |
| 22 | Interventions                                             | 11a | Interventions for each group with sufficient detail to allow replication, including how and when they will be administered                                                                                                                                                                                                                                                     | 11                   |
| 23 |                                                           |     |                                                                                                                                                                                                                                                                                                                                                                                |                      |
| 24 |                                                           |     |                                                                                                                                                                                                                                                                                                                                                                                |                      |
| 25 |                                                           |     |                                                                                                                                                                                                                                                                                                                                                                                |                      |
| 26 |                                                           | 11b | Criteria for discontinuing or modifying allocated interventions for a given trial participant (eg, drug dose change in response to harms, participant request, or improving/worsening disease)                                                                                                                                                                                 | N/A                  |
| 27 |                                                           |     |                                                                                                                                                                                                                                                                                                                                                                                |                      |
| 28 |                                                           |     |                                                                                                                                                                                                                                                                                                                                                                                |                      |
| 29 |                                                           | 11c | Strategies to improve adherence to intervention protocols, and any procedures for monitoring adherence (eg, drug tablet return, laboratory tests)                                                                                                                                                                                                                              | 19                   |
| 30 |                                                           |     |                                                                                                                                                                                                                                                                                                                                                                                |                      |
| 31 |                                                           |     |                                                                                                                                                                                                                                                                                                                                                                                |                      |
| 32 |                                                           | 11d | Relevant concomitant care and interventions that are permitted or prohibited during the trial                                                                                                                                                                                                                                                                                  | N/A                  |
| 33 |                                                           |     |                                                                                                                                                                                                                                                                                                                                                                                |                      |
| 34 | Outcomes                                                  | 12  | Primary, secondary, and other outcomes, including the specific measurement variable (eg, systolic blood pressure), analysis metric (eg, change from baseline, final value, time to event), method of aggregation (eg, median, proportion), and time point for each outcome. Explanation of the clinical relevance of chosen efficacy and harm outcomes is strongly recommended | 8                    |
| 35 |                                                           |     |                                                                                                                                                                                                                                                                                                                                                                                |                      |
| 36 |                                                           |     |                                                                                                                                                                                                                                                                                                                                                                                |                      |
| 37 |                                                           |     |                                                                                                                                                                                                                                                                                                                                                                                |                      |
| 38 |                                                           |     |                                                                                                                                                                                                                                                                                                                                                                                |                      |
| 39 |                                                           |     |                                                                                                                                                                                                                                                                                                                                                                                |                      |
| 40 | Participant timeline                                      | 13  | Time schedule of enrolment, interventions (including any run-ins and washouts), assessments, and visits for participants. A schematic diagram is highly recommended (see Figure)                                                                                                                                                                                               | Figure 1 and Table 2 |
| 41 |                                                           |     |                                                                                                                                                                                                                                                                                                                                                                                |                      |
| 42 |                                                           |     |                                                                                                                                                                                                                                                                                                                                                                                |                      |
| 43 |                                                           |     |                                                                                                                                                                                                                                                                                                                                                                                |                      |
| 44 |                                                           |     |                                                                                                                                                                                                                                                                                                                                                                                |                      |
| 45 |                                                           |     |                                                                                                                                                                                                                                                                                                                                                                                |                      |
| 46 |                                                           |     |                                                                                                                                                                                                                                                                                                                                                                                |                      |
| 47 |                                                           |     |                                                                                                                                                                                                                                                                                                                                                                                |                      |

|   |             |    |                                                                                                                                                                                       |    |
|---|-------------|----|---------------------------------------------------------------------------------------------------------------------------------------------------------------------------------------|----|
| 1 | Sample size | 14 | Estimated number of participants needed to achieve study objectives and how it was determined, including clinical and statistical assumptions supporting any sample size calculations | 19 |
| 2 |             |    |                                                                                                                                                                                       |    |
| 3 |             |    |                                                                                                                                                                                       |    |
| 4 | Recruitment | 15 | Strategies for achieving adequate participant enrolment to reach target sample size                                                                                                   | 15 |
| 5 |             |    |                                                                                                                                                                                       |    |
| 6 |             |    |                                                                                                                                                                                       |    |

### 7 **Methods: Assignment of interventions (for controlled trials)**

#### 9 Allocation:

|    |                                  |     |                                                                                                                                                                                                                                                                                                                                                          |       |
|----|----------------------------------|-----|----------------------------------------------------------------------------------------------------------------------------------------------------------------------------------------------------------------------------------------------------------------------------------------------------------------------------------------------------------|-------|
| 10 |                                  |     |                                                                                                                                                                                                                                                                                                                                                          |       |
| 11 | Sequence generation              | 16a | Method of generating the allocation sequence (eg, computer-generated random numbers), and list of any factors for stratification. To reduce predictability of a random sequence, details of any planned restriction (eg, blocking) should be provided in a separate document that is unavailable to those who enrol participants or assign interventions | 10    |
| 12 |                                  |     |                                                                                                                                                                                                                                                                                                                                                          |       |
| 13 |                                  |     |                                                                                                                                                                                                                                                                                                                                                          |       |
| 14 |                                  |     |                                                                                                                                                                                                                                                                                                                                                          |       |
| 15 |                                  |     |                                                                                                                                                                                                                                                                                                                                                          |       |
| 16 |                                  |     |                                                                                                                                                                                                                                                                                                                                                          |       |
| 17 | Allocation concealment mechanism | 16b | Mechanism of implementing the allocation sequence (eg, central telephone; sequentially numbered, opaque, sealed envelopes), describing any steps to conceal the sequence until interventions are assigned                                                                                                                                                | 10,16 |
| 18 |                                  |     |                                                                                                                                                                                                                                                                                                                                                          |       |
| 19 |                                  |     |                                                                                                                                                                                                                                                                                                                                                          |       |
| 20 |                                  |     |                                                                                                                                                                                                                                                                                                                                                          |       |
| 21 | Implementation                   | 16c | Who will generate the allocation sequence, who will enrol participants, and who will assign participants to interventions                                                                                                                                                                                                                                | 10    |
| 22 |                                  |     |                                                                                                                                                                                                                                                                                                                                                          |       |
| 23 |                                  |     |                                                                                                                                                                                                                                                                                                                                                          |       |
| 24 | Blinding (masking)               | 17a | Who will be blinded after assignment to interventions (eg, trial participants, care providers, outcome assessors, data analysts), and how                                                                                                                                                                                                                | 16    |
| 25 |                                  |     |                                                                                                                                                                                                                                                                                                                                                          |       |
| 26 |                                  |     |                                                                                                                                                                                                                                                                                                                                                          |       |
| 27 |                                  | 17b | If blinded, circumstances under which unblinding is permissible, and procedure for revealing a participant's allocated intervention during the trial                                                                                                                                                                                                     | N/A   |
| 28 |                                  |     |                                                                                                                                                                                                                                                                                                                                                          |       |
| 29 |                                  |     |                                                                                                                                                                                                                                                                                                                                                          |       |
| 30 |                                  |     |                                                                                                                                                                                                                                                                                                                                                          |       |
| 31 |                                  |     |                                                                                                                                                                                                                                                                                                                                                          |       |

### 32 **Methods: Data collection, management, and analysis**

|    |                         |     |                                                                                                                                                                                                                                                                                                                                                                                                              |         |
|----|-------------------------|-----|--------------------------------------------------------------------------------------------------------------------------------------------------------------------------------------------------------------------------------------------------------------------------------------------------------------------------------------------------------------------------------------------------------------|---------|
| 33 |                         |     |                                                                                                                                                                                                                                                                                                                                                                                                              |         |
| 34 | Data collection methods | 18a | Plans for assessment and collection of outcome, baseline, and other trial data, including any related processes to promote data quality (eg, duplicate measurements, training of assessors) and a description of study instruments (eg, questionnaires, laboratory tests) along with their reliability and validity, if known. Reference to where data collection forms can be found, if not in the protocol | Table 2 |
| 35 |                         |     |                                                                                                                                                                                                                                                                                                                                                                                                              |         |
| 36 |                         |     |                                                                                                                                                                                                                                                                                                                                                                                                              |         |
| 37 |                         |     |                                                                                                                                                                                                                                                                                                                                                                                                              |         |
| 38 |                         |     |                                                                                                                                                                                                                                                                                                                                                                                                              |         |
| 39 |                         | 18b | Plans to promote participant retention and complete follow-up, including list of any outcome data to be collected for participants who discontinue or deviate from intervention protocols                                                                                                                                                                                                                    | 18      |
| 40 |                         |     |                                                                                                                                                                                                                                                                                                                                                                                                              |         |
| 41 |                         |     |                                                                                                                                                                                                                                                                                                                                                                                                              |         |
| 42 |                         |     |                                                                                                                                                                                                                                                                                                                                                                                                              |         |
| 43 |                         |     |                                                                                                                                                                                                                                                                                                                                                                                                              |         |
| 44 |                         |     |                                                                                                                                                                                                                                                                                                                                                                                                              |         |



|    |                                 |     |                                                                                                                                                                                                                                                                                                                                       |     |
|----|---------------------------------|-----|---------------------------------------------------------------------------------------------------------------------------------------------------------------------------------------------------------------------------------------------------------------------------------------------------------------------------------------|-----|
| 1  | Data management                 | 19  | Plans for data entry, coding, security, and storage, including any related processes to promote data quality (eg, double data entry; range checks for data values). Reference to where details of data management procedures can be found, if not in the protocol                                                                     | 19  |
| 2  |                                 |     |                                                                                                                                                                                                                                                                                                                                       |     |
| 3  |                                 |     |                                                                                                                                                                                                                                                                                                                                       |     |
| 4  |                                 |     |                                                                                                                                                                                                                                                                                                                                       |     |
| 5  | Statistical methods             | 20a | Statistical methods for analysing primary and secondary outcomes. Reference to where other details of the statistical analysis plan can be found, if not in the protocol                                                                                                                                                              | 18  |
| 6  |                                 |     |                                                                                                                                                                                                                                                                                                                                       |     |
| 7  |                                 |     |                                                                                                                                                                                                                                                                                                                                       |     |
| 8  |                                 | 20b | Methods for any additional analyses (eg, subgroup and adjusted analyses)                                                                                                                                                                                                                                                              | 18  |
| 9  |                                 |     |                                                                                                                                                                                                                                                                                                                                       |     |
| 10 |                                 | 20c | Definition of analysis population relating to protocol non-adherence (eg, as randomised analysis), and any statistical methods to handle missing data (eg, multiple imputation)                                                                                                                                                       | 18  |
| 11 |                                 |     |                                                                                                                                                                                                                                                                                                                                       |     |
| 12 |                                 |     |                                                                                                                                                                                                                                                                                                                                       |     |
| 13 |                                 |     |                                                                                                                                                                                                                                                                                                                                       |     |
| 14 |                                 |     |                                                                                                                                                                                                                                                                                                                                       |     |
| 15 | <b>Methods: Monitoring</b>      |     |                                                                                                                                                                                                                                                                                                                                       |     |
| 16 |                                 |     |                                                                                                                                                                                                                                                                                                                                       |     |
| 17 | Data monitoring                 | 21a | Composition of data monitoring committee (DMC); summary of its role and reporting structure; statement of whether it is independent from the sponsor and competing interests; and reference to where further details about its charter can be found, if not in the protocol. Alternatively, an explanation of why a DMC is not needed | N/A |
| 18 |                                 |     |                                                                                                                                                                                                                                                                                                                                       |     |
| 19 |                                 |     |                                                                                                                                                                                                                                                                                                                                       |     |
| 20 |                                 |     |                                                                                                                                                                                                                                                                                                                                       |     |
| 21 |                                 |     |                                                                                                                                                                                                                                                                                                                                       |     |
| 22 |                                 | 21b | Description of any interim analyses and stopping guidelines, including who will have access to these interim results and make the final decision to terminate the trial                                                                                                                                                               | N/A |
| 23 |                                 |     |                                                                                                                                                                                                                                                                                                                                       |     |
| 24 |                                 |     |                                                                                                                                                                                                                                                                                                                                       |     |
| 25 | Harms                           | 22  | Plans for collecting, assessing, reporting, and managing solicited and spontaneously reported adverse events and other unintended effects of trial interventions or trial conduct                                                                                                                                                     | N/A |
| 26 |                                 |     |                                                                                                                                                                                                                                                                                                                                       |     |
| 27 |                                 |     |                                                                                                                                                                                                                                                                                                                                       |     |
| 28 |                                 |     |                                                                                                                                                                                                                                                                                                                                       |     |
| 29 | Auditing                        | 23  | Frequency and procedures for auditing trial conduct, if any, and whether the process will be independent from investigators and the sponsor                                                                                                                                                                                           | N/A |
| 30 |                                 |     |                                                                                                                                                                                                                                                                                                                                       |     |
| 31 |                                 |     |                                                                                                                                                                                                                                                                                                                                       |     |
| 32 |                                 |     |                                                                                                                                                                                                                                                                                                                                       |     |
| 33 | <b>Ethics and dissemination</b> |     |                                                                                                                                                                                                                                                                                                                                       |     |
| 34 |                                 |     |                                                                                                                                                                                                                                                                                                                                       |     |
| 35 | Research ethics approval        | 24  | Plans for seeking research ethics committee/institutional review board (REC/IRB) approval                                                                                                                                                                                                                                             | 23  |
| 36 |                                 |     |                                                                                                                                                                                                                                                                                                                                       |     |
| 37 |                                 |     |                                                                                                                                                                                                                                                                                                                                       |     |
| 38 | Protocol amendments             | 25  | Plans for communicating important protocol modifications (eg, changes to eligibility criteria, outcomes, analyses) to relevant parties (eg, investigators, REC/IRBs, trial participants, trial registries, journals, regulators)                                                                                                      | 23  |
| 39 |                                 |     |                                                                                                                                                                                                                                                                                                                                       |     |
| 40 |                                 |     |                                                                                                                                                                                                                                                                                                                                       |     |
| 41 |                                 |     |                                                                                                                                                                                                                                                                                                                                       |     |
| 42 |                                 |     |                                                                                                                                                                                                                                                                                                                                       |     |
| 43 |                                 |     |                                                                                                                                                                                                                                                                                                                                       |     |
| 44 |                                 |     |                                                                                                                                                                                                                                                                                                                                       |     |
| 45 |                                 |     |                                                                                                                                                                                                                                                                                                                                       |     |
| 46 |                                 |     |                                                                                                                                                                                                                                                                                                                                       |     |
| 47 |                                 |     |                                                                                                                                                                                                                                                                                                                                       |     |

|    |                               |     |                                                                                                                                                                                                                                                                                     |     |
|----|-------------------------------|-----|-------------------------------------------------------------------------------------------------------------------------------------------------------------------------------------------------------------------------------------------------------------------------------------|-----|
| 1  | Consent or assent             | 26a | Who will obtain informed consent or assent from potential trial participants or authorised surrogates, and how (see Item 32)                                                                                                                                                        | 16  |
| 2  |                               |     |                                                                                                                                                                                                                                                                                     |     |
| 3  |                               |     |                                                                                                                                                                                                                                                                                     |     |
| 4  |                               | 26b | Additional consent provisions for collection and use of participant data and biological specimens in ancillary studies, if applicable                                                                                                                                               | N/A |
| 5  |                               |     |                                                                                                                                                                                                                                                                                     |     |
| 6  |                               |     |                                                                                                                                                                                                                                                                                     |     |
| 7  | Confidentiality               | 27  | How personal information about potential and enrolled participants will be collected, shared, and maintained in order to protect confidentiality before, during, and after the trial                                                                                                | 19  |
| 8  |                               |     |                                                                                                                                                                                                                                                                                     |     |
| 9  |                               |     |                                                                                                                                                                                                                                                                                     |     |
| 10 | Declaration of interests      | 28  | Financial and other competing interests for principal investigators for the overall trial and each study site                                                                                                                                                                       | 24  |
| 11 |                               |     |                                                                                                                                                                                                                                                                                     |     |
| 12 |                               |     |                                                                                                                                                                                                                                                                                     |     |
| 13 | Access to data                | 29  | Statement of who will have access to the final trial dataset, and disclosure of contractual agreements that limit such access for investigators                                                                                                                                     | 24  |
| 14 |                               |     |                                                                                                                                                                                                                                                                                     |     |
| 15 |                               |     |                                                                                                                                                                                                                                                                                     |     |
| 16 | Ancillary and post-trial care | 30  | Provisions, if any, for ancillary and post-trial care, and for compensation to those who suffer harm from trial participation                                                                                                                                                       | N/A |
| 17 |                               |     |                                                                                                                                                                                                                                                                                     |     |
| 18 |                               |     |                                                                                                                                                                                                                                                                                     |     |
| 19 |                               |     |                                                                                                                                                                                                                                                                                     |     |
| 20 | Dissemination policy          | 31a | Plans for investigators and sponsor to communicate trial results to participants, healthcare professionals, the public, and other relevant groups (eg, via publication, reporting in results databases, or other data sharing arrangements), including any publication restrictions | 24  |
| 21 |                               |     |                                                                                                                                                                                                                                                                                     |     |
| 22 |                               |     |                                                                                                                                                                                                                                                                                     |     |
| 23 |                               |     |                                                                                                                                                                                                                                                                                     |     |
| 24 |                               | 31b | Authorship eligibility guidelines and any intended use of professional writers                                                                                                                                                                                                      | 24  |
| 25 |                               |     |                                                                                                                                                                                                                                                                                     |     |
| 26 |                               | 31c | Plans, if any, for granting public access to the full protocol, participant-level dataset, and statistical code                                                                                                                                                                     | 24  |
| 27 |                               |     |                                                                                                                                                                                                                                                                                     |     |
| 28 |                               |     |                                                                                                                                                                                                                                                                                     |     |
| 29 | <b>Appendices</b>             |     |                                                                                                                                                                                                                                                                                     |     |
| 30 |                               |     |                                                                                                                                                                                                                                                                                     |     |
| 31 | Informed consent materials    | 32  | Model consent form and other related documentation given to participants and authorised surrogates                                                                                                                                                                                  | N/A |
| 32 |                               |     |                                                                                                                                                                                                                                                                                     |     |
| 33 |                               |     |                                                                                                                                                                                                                                                                                     |     |
| 34 | Biological specimens          | 33  | Plans for collection, laboratory evaluation, and storage of biological specimens for genetic or molecular analysis in the current trial and for future use in ancillary studies, if applicable                                                                                      | N/A |
| 35 |                               |     |                                                                                                                                                                                                                                                                                     |     |
| 36 |                               |     |                                                                                                                                                                                                                                                                                     |     |

\*It is strongly recommended that this checklist be read in conjunction with the SPIRIT 2013 Explanation & Elaboration for important clarification on the items. Amendments to the protocol should be tracked and dated. The SPIRIT checklist is copyrighted by the SPIRIT Group under the Creative Commons "[Attribution-NonCommercial-NoDerivs 3.0 Unported](https://creativecommons.org/licenses/by-nc-nd/3.0/)" license.

# BMJ Open

## Using discrete choice experiments to design interventions for heterogeneous preferences: protocol for a pragmatic randomized controlled trial of a preference-informed, heterogeneity-focused, HIV testing offer for high-risk populations

|                                 |                                                                                                                                                                                                                                                                                                                                                                                                                                                                                                                                                                                                                                                                                                                                                                                                                                                                                                                                                                                                                                            |
|---------------------------------|--------------------------------------------------------------------------------------------------------------------------------------------------------------------------------------------------------------------------------------------------------------------------------------------------------------------------------------------------------------------------------------------------------------------------------------------------------------------------------------------------------------------------------------------------------------------------------------------------------------------------------------------------------------------------------------------------------------------------------------------------------------------------------------------------------------------------------------------------------------------------------------------------------------------------------------------------------------------------------------------------------------------------------------------|
| Journal:                        | <i>BMJ Open</i>                                                                                                                                                                                                                                                                                                                                                                                                                                                                                                                                                                                                                                                                                                                                                                                                                                                                                                                                                                                                                            |
| Manuscript ID                   | bmjopen-2020-039313.R1                                                                                                                                                                                                                                                                                                                                                                                                                                                                                                                                                                                                                                                                                                                                                                                                                                                                                                                                                                                                                     |
| Article Type:                   | Protocol                                                                                                                                                                                                                                                                                                                                                                                                                                                                                                                                                                                                                                                                                                                                                                                                                                                                                                                                                                                                                                   |
| Date Submitted by the Author:   | 05-Aug-2020                                                                                                                                                                                                                                                                                                                                                                                                                                                                                                                                                                                                                                                                                                                                                                                                                                                                                                                                                                                                                                |
| Complete List of Authors:       | Ostermann, Jan; University of South Carolina Arnold School of Public Health; Duke Global Health Institute<br>Njau, Bernard ; Kilimanjaro Christian Medical Centre<br>Hobbie, Amy; Duke Global Health Institute; Duke University Center for Health Policy and Inequalities Research<br>Mtuy, Tara; Kilimanjaro Christian Medical Centre; London School of Hygiene and Tropical Medicine Department of Global Health and Development<br>Masaki, Martha; Kilimanjaro Christian Medical Centre<br>Shayo, Aisa; Kilimanjaro Christian Medical Centre<br>van Zwetselaar, Marco; Kilimanjaro Christian Medical Centre<br>Masnick, Max; Selway Labs, LLC<br>Flaherty, Brian; University of Washington Department of Psychology<br>Brown, Derek S.; Washington University in Saint Louis George Warren Brown School of Social Work<br>Muehlbacher, Axel C.; Hochschule Neubrandenburg; Duke University Center for Health Policy and Inequalities Research<br>Thielman, Nathan; Duke University Department of Medicine; Duke Global Health Institute |
| <b>Primary Subject Heading</b>: | Health services research                                                                                                                                                                                                                                                                                                                                                                                                                                                                                                                                                                                                                                                                                                                                                                                                                                                                                                                                                                                                                   |
| Secondary Subject Heading:      | HIV/AIDS, Health economics, Health policy, Infectious diseases, Global health                                                                                                                                                                                                                                                                                                                                                                                                                                                                                                                                                                                                                                                                                                                                                                                                                                                                                                                                                              |
| Keywords:                       | HIV & AIDS < INFECTIOUS DISEASES, Public health < INFECTIOUS DISEASES, PUBLIC HEALTH, STATISTICS & RESEARCH METHODS, HEALTH ECONOMICS                                                                                                                                                                                                                                                                                                                                                                                                                                                                                                                                                                                                                                                                                                                                                                                                                                                                                                      |
|                                 |                                                                                                                                                                                                                                                                                                                                                                                                                                                                                                                                                                                                                                                                                                                                                                                                                                                                                                                                                                                                                                            |

SCHOLARONE™  
Manuscripts

1  
2  
3  
4  
5  
6  
7  
8  
9  
10  
11  
12  
13  
14  
15  
16  
17  
18  
19  
20  
21  
22  
23  
24  
25  
26  
27  
28  
29  
30  
31  
32  
33  
34  
35  
36  
37  
38  
39  
40  
41  
42  
43  
44  
45  
46  
47  
48  
49  
50  
51  
52  
53  
54  
55  
56  
57  
58  
59  
60

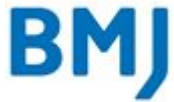

I, the Submitting Author has the right to grant and does grant on behalf of all authors of the Work (as defined in the below author licence), an exclusive licence and/or a non-exclusive licence for contributions from authors who are: i) UK Crown employees; ii) where BMJ has agreed a CC-BY licence shall apply, and/or iii) in accordance with the terms applicable for US Federal Government officers or employees acting as part of their official duties; on a worldwide, perpetual, irrevocable, royalty-free basis to BMJ Publishing Group Ltd ("BMJ") its licensees and where the relevant Journal is co-owned by BMJ to the co-owners of the Journal, to publish the Work in this journal and any other BMJ products and to exploit all rights, as set out in our [licence](#).

The Submitting Author accepts and understands that any supply made under these terms is made by BMJ to the Submitting Author unless you are acting as an employee on behalf of your employer or a postgraduate student of an affiliated institution which is paying any applicable article publishing charge ("APC") for Open Access articles. Where the Submitting Author wishes to make the Work available on an Open Access basis (and intends to pay the relevant APC), the terms of reuse of such Open Access shall be governed by a Creative Commons licence – details of these licences and which [Creative Commons](#) licence will apply to this Work are set out in our licence referred to above.

Other than as permitted in any relevant BMJ Author's Self Archiving Policies, I confirm this Work has not been accepted for publication elsewhere, is not being considered for publication elsewhere and does not duplicate material already published. I confirm all authors consent to publication of this Work and authorise the granting of this licence.

1  
2  
3  
4  
5  
6  
7  
8  
9

## Using discrete choice experiments to design interventions for heterogeneous preferences: protocol for a pragmatic randomized controlled trial of a preference-informed, heterogeneity-focused, HIV testing offer for high-risk populations

10  
11  
12  
13  
14  
15

### List of authors:

Jan Ostermann<sup>1, 2, 3, 4\*</sup>, Bernard Njau<sup>5</sup>, Amy Hobbie<sup>3,4</sup>, Tara Mtuy<sup>5,6</sup>, Martha L. Masaki<sup>5</sup>, Aisa Shayo<sup>5</sup>, Marco van Zwetselaar<sup>5</sup>, Max Masnick<sup>7</sup>, Brian P. Flaherty<sup>8</sup>, Derek S. Brown<sup>9</sup>, Axel C. Muehlbacher<sup>4,10,11</sup>, Nathan Thielman<sup>3,4</sup>

16  
17  
18  
19  
20  
21  
22  
23  
24  
25

### Corresponding author:

Jan Ostermann  
Department of Health Services Policy & Management  
University of South Carolina  
915 Greene Street  
Columbia, SC, 29205, USA  
[jano@mailbox.sc.edu](mailto:jano@mailbox.sc.edu)

26  
27  
28  
29  
30  
31  
32  
33  
34  
35  
36  
37  
38  
39  
40  
41  
42  
43  
44  
45  
46  
47  
48  
49

### Names and locations of institutions

<sup>1</sup> Department of Health Services Policy & Management, University of South Carolina, 915 Greene Street, Columbia, SC, 29205, USA

<sup>2</sup> South Carolina SmartState Center for Healthcare Quality, University of South Carolina, Columbia, SC, USA

<sup>3</sup> Duke Global Health Institute, Duke University, Durham, NC, USA

<sup>4</sup> Center for Health Policy & Inequalities Research, Duke University, Durham, NC, USA

<sup>5</sup> Kilimanjaro Christian Medical Centre, Moshi, Tanzania

<sup>6</sup> Department of Global Health and Development, London School of Hygiene and Tropical Medicine, London, UK

<sup>7</sup> Selway Labs, LLC, Barrington, RI, USA

<sup>8</sup> Department of Psychology, University of Washington, Seattle, Washington, USA

<sup>9</sup> Brown School, Washington University in St. Louis, St. Louis, Missouri, USA

<sup>10</sup> Institut Gesundheitsökonomie und Medizinmanagement, Hochschule Neubrandenburg, Neubrandenburg, Germany

<sup>11</sup> Department of Population Health Sciences, Duke University, Durham, NC, USA

50  
51  
52  
53  
54  
55  
56  
57  
58  
59  
60

**Keywords:** HIV counseling and testing; Discrete choice experiment; Preference heterogeneity; Latent class analysis; Pragmatic randomized controlled trial

# Using discrete choice experiments to design interventions for heterogeneous preferences: protocol for a pragmatic randomized controlled trial of a preference-informed, heterogeneity-focused, HIV testing offer for high-risk populations

## Abstract

**Introduction.** Approximately one million undiagnosed persons living with HIV (PLWH) in Southern and Eastern Africa need to test for HIV. Novel approaches are necessary to identify HIV testing options that match the heterogeneous testing preferences of high-risk populations. This pragmatic randomized controlled trial (PRCT) will evaluate the efficacy of a preference-informed, heterogeneity-focused HIV counseling and testing (HCT) offer, for improving rates of HIV testing in two high-risk populations.

**Methods and Analysis.** The study will be conducted in Moshi, Tanzania. The PRCT will randomize 600 female barworkers and 600 male Kilimanjaro mountain porters across three study arms. All participants will receive an HIV testing offer comprised of four preference-informed testing options, including one “common” option – comprising features that are commonly available in the area and, on average, are most preferred among study participants – and three options that are specific to the study arm. Options will be identified using mixed logit and latent class analyses of data from a discrete choice experiment (DCE). Participants in Arm 1 will be offered the common option and three “targeted” options that are predicted to be more preferred than the common option and combine features widely available in the study area. Those in Arm 2 will be offered the common option and three “enhanced” options, which also include HCT features that are not yet widely available in the study area. Participants in Arm 3,

1  
2  
3 an active control arm, will be offered the common option and three predicted “less preferred”  
4 options. The primary outcome will be uptake of HIV testing.  
5  
6  
7

8 **Ethics and Dissemination.** Ethical approval was obtained from the Duke University Health  
9 System IRB, the University of South Carolina IRB, the Ethics Review Committee at Kilimanjaro  
10 Christian Medical University College, Tanzania’s National Institute for Medical Research, and  
11 the Tanzania Food & Drugs Authority (now Tanzania Medicines & Medical Devices Authority).  
12 Findings will be published in peer-reviewed journals. The use of rigorous DCE methods for the  
13 preference-based design and tailoring of interventions could lead to novel policy options and  
14 implementation science approaches.  
15  
16  
17  
18  
19  
20  
21  
22  
23

24 **Registration.** The protocol was registered in ClinicalTrials.gov (Protocol NCT02714140) on  
25 March 21, 2016.  
26  
27  
28  
29  
30  
31  
32  
33  
34  
35  
36  
37  
38  
39  
40  
41  
42  
43  
44  
45  
46  
47  
48  
49  
50  
51  
52  
53  
54  
55  
56  
57  
58  
59  
60



## Strengths and limitations of this study

- The pragmatic randomized controlled trial described in this protocol paper includes males and females at high risk of HIV infection; the implementation of the trial in collaboration with all HIV testing providers in the study area allows for the evaluation of testing uptake in a nearly closed system.
- The study goes beyond the traditional approach of evaluating single-offer (“one-size-fits-all”) interventions by identifying combinations of testing options that explicitly target preference heterogeneity in the target population.
- The methods used to identify the intervention conditions evaluated in the trial, including the latent class analysis of data from the discrete choice experiment (DCE) used to elicit heterogeneous population preferences for HIV testing, may be applied to other contexts and may lead to the development of new implementation science approaches for systematically adapting effective interventions to local contexts.
- The study design will allow for separate estimates of the effects of SMS reminders, the issuance of physical HIV testing invitation cards, the heterogeneity-focused testing offer, and an incentive offer on HIV testing rates.
- Potential limitations include loss to follow-up during the multi-phase study, the finite range of HIV testing characteristics that can be included in a DCE, ordering effects and exogenous events during the study period that may influence rates of HIV testing across study arms, and limited generalizability of specific study findings to other populations and settings.

1  
2  
3 **Keywords (longer list)**  
4  
5

6 HIV counseling and testing; Discrete choice experiment; Preference heterogeneity; Latent class  
7 analysis; Pragmatic randomized controlled trial; Mobile health (mHealth); Reminders;  
8  
9 Conditional financial transfers; Policy design; Implementation science; Tanzania; sub-Saharan  
10  
11  
12 Africa  
13  
14  
15  
16  
17  
18  
19  
20  
21  
22  
23  
24  
25  
26  
27  
28  
29  
30  
31  
32  
33  
34  
35  
36  
37  
38  
39  
40  
41  
42  
43  
44  
45  
46  
47  
48  
49  
50  
51  
52  
53  
54  
55  
56  
57  
58  
59  
60

For peer review only

## Background

In 2018, 37.9 million people were living with HIV worldwide, and 770,000 died of HIV-related illnesses.<sup>1</sup> HIV counseling and testing (HCT) is a cost-effective intervention for increasing HIV serostatus awareness,<sup>2,3</sup> a point of entry into HIV care and treatment, and an important means of primary and secondary HIV prevention.<sup>4</sup> HIV Prevention Trials Network Protocol 052 conclusively demonstrated a marked reduction in HIV transmission among serodiscordant couples in which the HIV-infected partner was begun on antiretroviral therapy early in the course of infection.<sup>5</sup> Subsequently, public health officials and policymakers, considering treatment as prevention, have called for dramatic increases in HIV testing — as frequently as annually in many populations and semi-annually among individuals at high risk.<sup>6</sup>

In 2014, the Joint United Nations Programme on HIV/AIDS (UNAIDS) set for 2020 the ambitious 90-90-90 target: diagnosing 90% of all persons living with HIV (PLWH), initiating treatment for 90% of those diagnosed, and achieving viral suppression for 90% of those treated.<sup>7</sup> While substantial progress has been made toward these targets since 2014, most countries remain short of at least one target, and the number of undiagnosed HIV infections in every region are considered a major hindrance to achieving the UNAIDS targets and ending the epidemic.<sup>8</sup> Novel approaches are needed to increase testing uptake, especially among high-risk groups.

In order to establish the diagnosis of HIV in 90% of all PLWH in Eastern and Southern Africa, more than 1 million undiagnosed infected persons need to test, including 190,000 in Tanzania.<sup>4,6,9</sup> Tanzania's 2017-22 Health Sector HIV and AIDS Strategic Plan (HSHSP-IV) lists as a key challenge that HIV testing services “need to be more efficient and ambitious to meet the 90-90-90 targets through more targeted testing approaches.”<sup>10</sup> Evaluations of population preferences for testing have typically focused on the acceptability of specific testing options, such as home-based,<sup>11-13</sup> provider-initiated,<sup>14-17</sup> or workplace testing,<sup>18,19</sup> usually without

1  
2  
3 consideration or offer of other options. Results from these narrow assessments do not probe the  
4 potential diversity in testing preferences among target populations and cannot characterize  
5 which testing options will maximize uptake of testing.<sup>20-22</sup>  
6  
7  
8  
9

10 Discrete choice experiments (DCEs), grounded in the economic theory of utility maximization,  
11 are specifically designed to provide information about individuals' preferences for varying  
12 characteristics of multi-attribute products. The DCE method is based on the assumption that a  
13 product or service such as HCT can be described in terms of its characteristics, namely  
14 attributes and levels within attributes. Participants are repeatedly asked to choose between two  
15 or more alternatives in choice scenarios simulating real choice decisions. Each alternative  
16 differs in the arrangement of attribute levels presented to the participant. The choice scenarios  
17 are systematically varied by means of an experimental design.<sup>23-26</sup> Relative attribute importance,  
18 the utility that respondents derive from the diverse options, and trade-offs, i.e., the willingness to  
19 trade between attribute levels, can be quantified analytically.<sup>27</sup> DCEs are used increasingly to  
20 understand patient perspectives and to design patient-centered interventions. Although DCEs  
21 have been used in various contexts related to HIV, including testing,<sup>20,28-32</sup> prevention,<sup>33-36</sup>  
22 service delivery,<sup>37-39</sup> and treatment,<sup>40-44</sup> to our knowledge DCEs have not yet been used to  
23 systematically design HIV counseling and testing interventions.  
24  
25  
26  
27  
28  
29  
30  
31  
32  
33  
34  
35  
36  
37  
38  
39  
40

41 Below we describe the study protocol for a pragmatic randomized controlled trial (PRCT) that  
42 evaluates the efficacy of a targeted, preference-informed HCT offer for improving rates of HIV  
43 testing in high-risk populations. The testing offer is developed using data from a discrete choice  
44 experiment (DCE) and designed to match the heterogeneous HIV testing preferences in the  
45 target population. To our knowledge this is the first PRCT in which the study conditions are  
46 optimized using data from a DCE, and the first PRCT that evaluates an intervention explicitly  
47 targeting preference heterogeneity.  
48  
49  
50  
51  
52  
53  
54  
55  
56  
57  
58  
59  
60

## Methods and analysis

### Study aim and hypothesis

The aim of this study is to evaluate the efficacy of a preference-informed, heterogeneity-focused HCT offer for improving rates of HIV testing among two high-risk populations. We hypothesize that an HCT offer matched to the specific preferences of the intended target population and explicitly accounting for preference heterogeneity within these populations will increase rates of testing relative to a control offer.

### Study setting

The study is conducted in Moshi, Tanzania. Moshi is the commercial center and administrative capital of the Kilimanjaro Region in Northern Tanzania and has an estimated population of about 200,000.<sup>45</sup> Moshi has 25 HCT facilities, including 8 care and treatment centres (CTCs), which provide free HIV care to persons living with HIV.<sup>46</sup> The study is implemented with support from the Regional Medical Officer and the Regional AIDS Control Coordinator of the Kilimanjaro Region.

### Study participants

The study population comprises women employed in bars, restaurants and guesthouses serving alcohol to patrons ("female barworkers", FBW), and male mountain porters who are supporting climbers of nearby Mount Kilimanjaro ("Kilimanjaro mountain porters", KMP). The Regional AIDS Control Coordinator identified these groups as populations at high risk of HIV infection who could benefit from increased rates of testing; we subsequently showed that FBW and KMP engage in higher rates of HIV risk behaviors than randomly selected male and female

1  
2  
3 community members in the same setting.<sup>20</sup> For example, compared to randomly selected  
4 community members, FBW and KMP reported 2–3 times as many lifetime sexual partners,  
5 higher rates of sexually transmitted illnesses, and higher rates of having sex in exchange for  
6 money or gifts, but similar numbers of lifetime HIV tests.<sup>20</sup> A census of bars and female  
7 barworkers, conducted by the study team between February and June of 2016, identified 612  
8 venues within Moshi, with 2,059 age-eligible FBW. There are an estimated 10,000 porters in the  
9 Kilimanjaro Region.<sup>47,48</sup>

### 18 Inclusion criteria

19 Eligible study participants are ages 18 or older, reside in Moshi, are able to read, and have no  
20 concrete plans to leave the study area during the 12- to 15-month period following study  
21 enrollment.

### 28 Outcome measure

29 The study outcome of interest is uptake of HIV testing. During the multi-phase study (see  
30 below), the outcome is ascertained repeatedly by counselors' documentation of participants'  
31 HIV tests, self-reports from study participants, or both. In the PRCT and one preceding study  
32 phase, coded HIV testing invitation cards will be distributed to participants and HIV tests will be  
33 tracked on the basis of cards returned to any HIV testing center in the study area. Self-reports  
34 capture tests outside the study area and tests without cards. The primary outcome measure is  
35 counselor-documented uptake of testing. A secondary outcome measure is counselor-  
36 documented or self-reported uptake of testing.

### 48 Study design

49 The study is comprised of 5 sequential phases (**Figure 1**). The target duration for each phase is  
50 13 weeks (91 days).

1  
2  
3 **Phase A: Reference phase.** Phase A includes no intervention. The purpose of this phase is to  
4 inform estimates of background rates of HIV testing among individuals participating in a  
5 research study focusing on HIV testing. A phone survey after 13 weeks (91 days) will ask  
6 participants about any HIV test during Phase A.  
7  
8  
9  
10

11  
12 **Phase B: SMS phase.** In Phase B, a Short Messaging System (SMS) reminder message to  
13 test for HIV will be sent to participants 4 weeks (28 days) after the beginning of Phase B. The  
14 purpose of this phase is to inform estimates of the effect of an SMS reminder on rates of HIV  
15 testing. A phone survey after 13 weeks (91 days) will ask participants about any HIV test during  
16 Phase B.  
17  
18  
19  
20  
21  
22

23  
24 **Phase C: Invitation phase.** In Phase C, participants will be given a credit card-sized invitation  
25 card describing an HIV testing option that combines features commonly available in the study  
26 area, and that, on average, are most preferred among study participants (“**common option**”).  
27 Four weeks (28 days) after the beginning of Phase C, participants will be sent an SMS reminder  
28 to test for HIV as shown on the invitation card given to them. The purpose of this study phase is  
29 to inform estimates of the effect of a testing invitation on rates of HIV testing. A phone survey  
30 after 13 weeks (91 days) will ask participants about any HIV test during Phase C.  
31  
32  
33  
34  
35  
36  
37  
38

39  
40 **Phase D: The pragmatic randomized controlled trial.** Phase D is a PRCT that includes three  
41 parallel study arms (**Table 1**). All participants will receive an HIV testing offer comprised of four  
42 invitation cards describing preference-informed HIV testing options. Participants will be asked to  
43 test for HIV using their individually most preferred of the 4 testing options given to them. Options  
44 will be identified using mixed logit and latent class analyses of data from a discrete choice  
45 experiment (DCE) with members of the target populations (see below). **Arm 1** participants will  
46 be offered the common option and three “**targeted**” options, predicted to be jointly more  
47 preferred than the common option and comprising testing features widely available in the study  
48  
49  
50  
51  
52  
53  
54  
55  
56  
57  
58  
59  
60

1  
2  
3 area. **Arm 2** participants will be offered the common option and three “**enhanced**” options,  
4 which are also predicted to be jointly more preferred than the common option but include  
5 additional features that are not yet widely available in the study area. **Arm 3** participants will be  
6 offered the common option and three options that are jointly predicted to be “**less preferred**”  
7 than the common option. In other words, for arm 3 participants, the common option is the  
8 predicted most preferred of the four options; the other three options, on average, provide no  
9 additional value. Arms 1 and 2 are intervention arms. Arm 3 represents an active control arm:  
10 study involvement in Arm 3 is the same as in Arms 1 and 2. Four weeks (28 days) after the  
11 beginning of Phase D, participants will be sent an SMS reminder to test for HIV using any of the  
12 testing options given to them. The purpose of this study phase is to obtain estimates of the  
13 effect of a heterogeneity-focused HIV testing offer on rates of HIV testing. A phone survey after  
14 13 weeks (91 days) will ask participants about any HIV test during Phase D.  
15  
16  
17  
18  
19  
20  
21  
22  
23  
24  
25  
26  
27  
28

29 **Phase E: Incentive phase.** In phase E, participants will be offered an incentive to test for HIV  
30 using their choice of any of the testing options remaining to them from Phase D. An SMS  
31 reminder will be sent to participants 4 weeks (28 days) after the beginning of Phase E. The  
32 purpose of this phase is to inform estimates of the effect of a conditional financial transfer (CFT)  
33 on testing decisions and identify the most preferred testing option among those offered, among  
34 participants who did not test during Phase D.  
35  
36  
37  
38  
39  
40  
41  
42

43 The study design will allow for separate estimates of the effects on HIV testing rates of:  
44  
45

- 46 (1) an SMS reminder message,
  - 47 (2) a testing invitation,
  - 48 (3) a heterogeneity-focused testing offer, and
  - 49 (4) a conditional financial transfer (CFT) offer.
- 50  
51  
52  
53  
54  
55  
56  
57  
58  
59  
60



## Assignment to study arms

Participant IDs will be randomly assigned to study arms using a random number generator. The testing offer in Phase D will reflect the study arm assigned to the respective Participant ID. The random assignment is expected to result in approximately equal numbers of participants in each study arm.

## Design of the intervention

**Overview.** A DCE will be used to elicit information on the distribution of preferences for feasible and modifiable characteristics of HIV testing options in the target population. DCE data will be analyzed, and results of these analyses will be used to identify four types of testing options that will be offered to participants in the PRCT:

- 1) **A “common” option.** This single testing option combines testing features that are widely available in the study area, and, on average, are most preferred among study participants. This option will be offered to all participants in Phases C and D.
- 2) **Three “targeted” options.** This set of testing options, comprising features widely available in the study area, is predicted to be jointly more preferred than the common option by the largest possible share of participants.
- 3) **Three “enhanced” options.** Enhanced testing options include additional features that are not yet widely available in the study area (e.g., oral testing). The set of enhanced testing options is predicted to be jointly more preferred than the common option by the largest possible share of participants.
- 4) **Three “less preferred” options.** This set of testing options includes options that are predicted to be equally or less preferred than the common option by the largest possible share of participants.

1  
2  
3 The design decision to offer three targeted, enhanced, and less preferred options was driven by  
4 practical considerations: (1) a choice from 4 alternatives (the common option plus 3 options  
5 specific to the study arm) is expected to be cognitively feasible for participants, (2) the  
6 implementation of 10 testing options (one common option, plus 3 targeted, 3 enhanced, and 3  
7 less preferred options) as part of this study is feasible from a logistical and budgetary  
8 perspective; and (3) the widespread implementation of 3 testing options that target preference  
9 heterogeneity is feasible in the study area. The statistical analysis of the DCE data (see below)  
10 will determine whether the testing offers differ between FBW and KMP.  
11  
12  
13  
14  
15  
16  
17  
18  
19  
20

### 21 **Development and fielding of the DCE**

22  
23  
24 A DCE with 300 FBW and 300 KMP recruited prior to the PRCT will characterize the patterns  
25 and variability in HIV testing preferences in the target population. The DCE development will  
26 follow guidelines and procedures established in our prior studies of HIV testing  
27 preferences.<sup>21,23,49</sup> Focus group discussions with members of the target populations will be used  
28 to prioritize HIV testing features with respect to their expected influence on HIV testing  
29 decisions, and to establish levels of features that represent plausible trade-offs in actual or  
30 hypothetical HIV testing interventions. Reconciling prior qualitative work<sup>22</sup> with the objectives of  
31 the PRCT, the DCE is expected to include feasible attributes and levels across three domains:  
32 privacy and confidentiality (e.g. testing venue, different types of counseling), accessibility and  
33 value (testing availability, additional services provided), and perceived quality and accuracy  
34 (e.g. type of sample for the HIV test).  
35  
36  
37  
38  
39  
40  
41  
42  
43  
44  
45  
46  
47

48 In the DCE survey, respondents will be introduced to each attribute and level and asked to  
49 complete 12 to 16 choice tasks. Each choice task will include 3 hypothetical testing options;  
50 participants will be asked to identify their preferred alternative. The combination of alternatives  
51 presented to respondents as part of the DCE will be varied according to a *d*-efficient statistical  
52  
53  
54  
55  
56  
57  
58  
59  
60

1  
2  
3 design,<sup>50</sup> generated in Ngene software (ChoiceMetrics). Survey content and presentation will be  
4 tested in up to 40 guided individual pretest interviews. Pilot studies with at least 200 participants  
5 will yield statistical priors that inform the statistical design of the final DCE. DCE surveys will be  
6 administered in-person, in Kiswahili, using tablet devices, by trained research staff using the  
7 custom-built survey software, *comet* (Selway Labs).  
8  
9  
10  
11  
12

13  
14 Continuous recruitment and enrollment may result in overlap between DCE survey respondents  
15 and PRCT participants. All PRCT participants will complete the DCE survey to allow for  
16 comparisons of stated preferences (DCE survey responses) and revealed preferences (testing  
17 decisions).  
18  
19  
20  
21  
22

### 23 24 **Analysis of DCE data**

25  
26 The analysis of DCE data will follow established guidelines.<sup>23,49</sup> To estimate mean (average)  
27 preferences in the study population, DCE data will be first analyzed using mixed, or random  
28 parameters, logit models using Stata (StataCorp) version 15,<sup>51</sup> which traditionally were  
29 considered best practice for analyzing DCE data,<sup>52</sup> but focus on average preferences. To model  
30 systematic variation in preferences across respondents, a random effects latent class logit  
31 (RELCL) model will be estimated in Latent Gold Choice version 5.0 (Statistical Innovations Inc.  
32 2018). RELCL models allow for the joint modeling of systematic variation in preferences (latent  
33 classes) and random variation in preferences (random effects) across respondents.<sup>53</sup> The  
34 Bayesian Information Criterion (BIC) will be used to identify which model yields the best fit for  
35 the data.  
36  
37  
38  
39  
40  
41  
42  
43  
44  
45  
46  
47  
48

49 To evaluate whether the distribution of preferences differs significantly between the two groups  
50 of participants (FBW vs. KMP), participant type will be included in the model as a covariate. If  
51 the distributions of preferences differ significantly across groups, separate preference-informed  
52 testing options may need to be identified for FBW and KMP. On the other hand, if the  
53  
54  
55  
56  
57  
58  
59  
60

1  
2  
3 preference distributions are broadly similar, the testing offer can be optimized for the joint  
4 preferences of both populations.  
5  
6  
7

### 8 **Selection of testing options for inclusion in the PRCT**

9

10  
11 Results from the mixed logit model will be used to identify the common option; results from the  
12 best-fitting latent class model will be used to identify the combinations of targeted, enhanced,  
13 and less-preferred options to be included in the PRCT.  
14  
15  
16  
17

18  
19 **Common option:** The common option will combine the most preferred (on average) levels of  
20 each attribute included in the DCE, as described by the mean parameter estimates from the  
21 mixed logit model.  
22  
23  
24  
25

26 **Targeted, enhanced, and less-preferred options:** The latent class analysis will identify  
27 statistical groupings of individuals with similar sets of preferences; these groupings are referred  
28 to as classes. Using parameter estimates from the latent class model, we will predict class-  
29 specific relative preferences for all feasible combinations of feature levels (i.e., testing options),  
30 which, in turn, will be converted into predicted choice probabilities in a simulated choice  
31 between the respective testing option and the “common option”. Class-specific predicted choice  
32 probabilities will be aggregated across classes (taking into consideration the estimated class  
33 sizes) to calculate the share of the population predicted to prefer each testing option over the  
34 common option. These shares are used, as follows, to generate population-based rankings of  
35 all feasible combinations of three testing options. For targeted options, we will select from all  
36 options that combine features currently available in the study area the three options that jointly  
37 maximize the share of participants predicted to choose at least one of those three targeted  
38 options over the common option. Similarly, for enhanced options, we will select from all options  
39 that include additional features not yet widely available in the study area the three options that  
40 jointly maximize the share of participants predicted to choose at least one of those three  
41  
42  
43  
44  
45  
46  
47  
48  
49  
50  
51  
52  
53  
54  
55  
56  
57  
58  
59  
60

1  
2  
3 enhanced options over the common option. For less preferred options, we will select the three  
4 options that jointly maximize the share of participants predicted to prefer the common option  
5 over all less preferred options.  
6  
7  
8  
9

### 10 **Presentation of testing options to study participants**

11  
12  
13 Testing options will be presented to participants on physical invitation cards. Each participant  
14 will be given 4 cards; each card will describe the characteristics of the testing option in a format  
15 similar to that presented in the DCE. The combination of cards given to a participant will be  
16 determined by the study arm assigned to the participant; references to specific testing venues  
17 may be varied according to participants' location of residence or preferred testing venue. Cards  
18 will have unique codes that allow for the tracking of participants' testing uptake across testing  
19 venues in the study area.  
20  
21  
22  
23  
24  
25  
26  
27  
28

### 29 **SMS delivery**

30  
31  
32 SMS messages will be sent via a highly versatile, low-cost, mHealth system, called *mobile*  
33 *phone based appointment reminder and incentive system (mParis)*, which can autonomously  
34 send large numbers of SMS messages according to pre-specified algorithms and is based in the  
35 study area.<sup>54,55</sup>  
36  
37  
38  
39  
40  
41

### 42 **Testing incentive**

43  
44  
45 During Phase E, an incentive in the amount of TSH 5000 (~US \$2.20) will be given in cash to  
46 participants presenting for testing with a coded testing invitation card at any of the testing  
47 venues in the study area. The amount is based on a willingness-to-accept study previously  
48 conducted in the same area.<sup>56</sup>  
49  
50  
51  
52  
53  
54  
55  
56  
57  
58  
59  
60

## Sample size

The target sample size for the PRCT is 1200 participants, comprising equal numbers of FBW and KMP. Randomization across study arms is expected to result in three groups with approximately 400 participants each.

## Recruitment

Participants for formative work will be recruited using convenience and snowball sampling. For DCE surveys and the PRCT, the goal is to employ a systematic recruitment approach that minimizes biases. Mountain porters will be recruited from the Mweka gate of Kilimanjaro National Park. The Mweka gate is selected because of its proximity to Moshi (~15 kilometers); four of six popular climbing routes descend through this gate. Porters exiting the gate will be approached sequentially, and eligible porters will be handed an invitation card containing contact information and an invitation to the study's research office for consent and enrollment. For the recruitment of female barworkers, bars will be randomized and visited in the order of randomization. Eligible FBW will be consented at their place of work or given invitation cards containing contact information and an invitation to the study's research office for consent and enrollment. Recruited participants may receive reminder phone calls or SMS messages to come to the study offices for more information and study enrollment.

## Enrollment and informed consent

Eligible individuals contacted for participation in the study will be informed by trained study personnel of the study purpose, procedures, as well as risks and benefits during the informed consent process. Only consenting individuals will be included in the study. Study participants' mobile phone numbers and the name and phone number of a contact person through whom they can be reached will be recorded to allow for phone-based follow-up.

1  
2  
3 Enrollment into the trial will be conducted in three sequential stages. Approximately half the  
4 participants will be enrolled into Phase A and one quarter each into Phases C and D. This  
5 approach ensures variation in the exposure to pre-PRCT intervention components across  
6 participants, thereby allowing for the estimation of potential ordering effects as participants  
7 move through the different study phases. The staggered enrollment also ensures a better  
8 alignment of study timelines for Phases D and E across participants.  
9  
10  
11  
12  
13  
14  
15

## 16 **Blinding**

17  
18  
19  
20 Participants will be blinded with respect to their assignment across the three study arms. While  
21 research staff are not blinded to participants' study arm assignment, study procedures are the  
22 same for all arms except for the characteristics of the testing offer.  
23  
24  
25  
26

## 27 **Study activities**

28  
29  
30 Study activities and their schedule are shown in **Table 2**.  
31  
32

33 Participants providing informed consent will be enrolled in the study. At the time of enrollment,  
34 a baseline survey will be conducted with all participants to assess socio-demographic  
35 characteristics, testing history, testing preferences, HIV serostatus, and HIV risk.  
36  
37  
38  
39

40  
41 After enrollment, participants will progress through up to 5 study phases. Phase A represents a  
42 no-intervention phase. Phase B starts with the completion of a Phase A follow-up survey. Phase  
43 C starts with the distribution of a physical invitation card that describes the “common” option.  
44  
45 Phase D starts with the distribution of four physical invitation cards that describe the preference-  
46 informed HIV testing options, namely the “common” option and three “targeted”, “enhanced”, or  
47 predicted “less preferred” options, depending on the study arm. Phase E starts with a phone call  
48 or SMS message offering a financial incentive to test. SMS reminder messages will be sent 28  
49 days after the beginning of Phases B, C, D, and E. Phases A and B will end with a short phone-  
50  
51  
52  
53  
54  
55  
56  
57  
58  
59  
60

1  
2  
3 based survey with study participants. Phases C, D, and E will end with a phone-based survey or  
4 the collection of a testing invitation card from testing sites, whichever occurs earlier. After the  
5 completion of Phases B and C, participants will be contacted by phone and SMS and invited to  
6 come to the local study office for receipt of testing options.  
7  
8  
9  
10

11  
12 HIV testing will be done in accordance with Tanzania's National AIDS Control Program (NACP)  
13 guidelines.<sup>57</sup> Since 2013, Tanzania's National Comprehensive Guidelines for HIV Testing and  
14 Counselling describe specific retesting intervals ranging from 4 weeks to 6 months for most  
15 persons at elevated risk of HIV infection.<sup>58</sup> Our own survey of HIV testing sites in the study area  
16 revealed that most counselors continue to recommend retesting after 3 months for all clients  
17 testing negative for HIV, regardless of risk. As per NACP guidelines, participants testing positive  
18 for HIV will be linked to care at a local CTC. Participants who report having tested positive for  
19 HIV, or those for whom documentation of a positive HIV test is collected from testing sites, will  
20 discontinue participation in HIV testing related components of the study and will instead be  
21 given a brief survey about their linkage to HIV care and treatment.  
22  
23  
24  
25  
26  
27  
28  
29  
30  
31  
32  
33

### 34 **Study timeline**

35  
36  
37 The schedule of activities implies a minimum time of 15 months for participants to progress  
38 through all 5 study phases. Delays in reaching participants by phone and delays in participants  
39 returning to study offices will extend the duration of follow-up. In order to minimize loss to follow-  
40 up prior to the PRCT and reduce variability in the timing of the PRCT across participants, all  
41 participants in Phases A, B or C who are 91 or more days late for a follow-up assessment will  
42 transition to Phase D during their next in-person visit. Additionally, participants may be directly  
43 enrolled into Phases C and D (**Figure 1**). Study enrollment will continue until the target number  
44 of N=1200 participants in the PRCT (Phase D) has been reached. Follow-up will continue until 6  
45 months after the last participant enters Phase D.  
46  
47  
48  
49  
50  
51  
52  
53  
54  
55  
56  
57  
58  
59  
60



## Participant retention

To maximize retention, study participants due for follow-up may receive multiple phone calls and SMS reminders to come to the study offices. Escalating incentives, i.e., incentive amounts that increase across consecutive study phases, will be used. The effect of selective attrition on estimates will be evaluated in sensitivity analyses (see below).

## Statistical analysis

The primary analysis involves the comparison of testing rates between study arms in Phase D. The effect of the intervention — a preference-informed, heterogeneity-focused, HIV testing offer — will be described by differences in testing uptake between those offered targeted or enhanced options, relative to those offered predicted less preferred options. Statistical significance will be evaluated in a bivariate analysis using a chi-squared test. Logistic regression analysis will evaluate the statistical significance of differences in a multivariate framework. Uptake of HIV testing within 3 months of the beginning of Phase D will be the binary outcome variable; study arm will be the key explanatory variable. Systematic variation in the efficacy of the intervention, e.g., by gender or with HIV risk, can be modeled using interactions between study arm and the respective covariates.

Survival models with up to 5 observations per participant (one each for Phases A, B, C, D, and E) will be used to estimate the differential effects of study arm assignment, SMS reminders, invitations, and conditional financial incentives, on rates of HIV testing. The time until an HIV test following the beginning of the respective study phase constitutes the dependent variable. “Exposure” to SMS reminders, invitations, and a financial incentive are hypothesized to increase the “hazard” of testing relative to no intervention. To control for potential ordering effects, participants exposure to intervention components in prior study phases (Phase B and C SMS reminders, Phase C testing offer, recent testing uptake) will be included as covariates.

## Statistical power

**DCE.** Statistical power in DCEs varies with sample size, the number of choice tasks, the number of alternatives per task, and the number of attributes and levels, among other characteristics. An empirical power-test formula by Yang et al (2015) suggests that the DCE sample size (N=600) allows us to estimate the utility difference between the most and least-preferred testing options with a precision that is better than that of 'the average' DCE study.<sup>59</sup> A sample size guidance by Orme<sup>60</sup> suggests that the two study populations (N=600 each) and three cohorts (N=400 each) are sufficiently large to derive independent estimates for each sub-cohort.

**PRCT.** The sample size for the three-arm trial (N=1200) was selected to ensure adequate statistical power to identify the statistical significance of policy-relevant differences in testing uptake between study arms. We expect testing rates in Arm 3 to range from 25% among porters (as in our preliminary data) to 40% among barworkers (lower than the 59% in our preliminary data where barworkers were enrolled at a health facility).<sup>20</sup> Assuming an equal split between study arms, 400 participants per arm yield 65-72% power to detect a difference of 10 percentage points, 94-96% power for a difference of 15 points and >99% power for difference of 20 percentage points between the targeted, respectively enhanced, arms and the comparison arm (alpha=0.05, two-sided).

## Reporting of results

Methods and results will be reported in accordance with the *CONSORT* reporting guidelines and its extensions for pragmatic randomized controlled trials (see **Supplemental Files 1-4**).<sup>61</sup>

## Sensitivity analyses

Extensive sensitivity analyses will describe the sensitivity of our estimates to the definition of the outcome variable, model specification, and selective attrition. Estimates from the analysis of the secondary outcome measure (counselor-documented or self-reported testing uptake) will be presented alongside the analysis of the primary outcome measure (counselor-documented HIV testing). The DCE choice data will be analyzed using a broad range of models in order to describe the sensitivity of the selected PRCT testing offers to model specification and assumptions. The effect of attrition will be estimated by modeling attrition as a function of observable characteristics at the time of enrollment and weighing individual-level predictions of the intervention effect by the inverse probability of attrition. Differences between the average intervention effect and the attrition-weighted average effect will characterize the effects of selective attrition on our estimates.

## Data security and confidentiality

A research data security plan (RDSP) will ensure that data are kept in compliance with relevant privacy regulations, including HIPAA; access to identifying information will be strictly limited. Study personnel will be instructed to keep the identity of all research subjects confidential and will sign confidentiality agreements.

## Monitoring and quality assurance

Adherence to intervention protocols and the completeness and quality of study data will be monitored by the principal investigators and a study monitor. Electronic data capture on tablet devices and daily uploads to secure servers allow for the continuous monitoring of study activities in near real time. All paper documents will be scanned. Rigorous quality assurance / quality control procedures will be established, including interviewer observation, validation and

1  
2  
3 range checks during data entry, verification of entered data, and the monitoring of time stamps  
4  
5 for DCE choice tasks.  
6  
7

### 8 **Patient and public involvement** 9

10  
11 Focus group discussions with members of the target populations will be used to prioritize HIV  
12 testing features with respect to their expected influence on HIV testing decisions, and to  
13 establish levels of features that represent plausible trade-offs in actual or hypothetical HIV  
14 testing interventions. The results will inform the development of the DCE and the testing options  
15 in the PRCT.  
16  
17  
18  
19  
20  
21  
22

### 23 **Ethics and Dissemination** 24

25  
26 Ethical approval was obtained from the Duke University Health System IRB, the University of  
27 South Carolina IRB, the Ethics Review Committee at Kilimanjaro Christian Medical University  
28 College, Tanzania's National Institute for Medical Research, and the Tanzania Food & Drugs  
29 Authority (now Tanzania Medicines & Medical Devices Authority). Findings will be published in  
30 peer-reviewed journals. The use of rigorous DCE methods for the preference-based design and  
31 tailoring of interventions could lead to novel policy options and implementation science  
32 approaches.  
33  
34  
35  
36  
37  
38  
39  
40  
41  
42  
43  
44

### 45 **Discussion** 46

47  
48  
49 This study will evaluate whether an HIV testing intervention, which is uniquely designed using  
50 data from a DCE and explicitly targets preference heterogeneity, will improve testing uptake. If  
51 testing rates differ between study arms, the results will support our hypothesis that DCE-derived  
52 preference data can be used to systematically design HIV testing interventions that target  
53  
54  
55  
56  
57  
58  
59  
60

1  
2  
3 heterogeneous preferences among and within high-risk populations, and that offering such  
4 interventions will increase testing uptake in target populations. With novel approaches to testing  
5 urgently needed to reach the 90-90-90 targets, the DCE and targeted methods used in this  
6 study may be broadly used to develop cost-effective testing offers that match the preferences of  
7 high-risk populations across diverse settings.  
8  
9  
10  
11  
12

13  
14 To our knowledge this is the first PRCT in which the intervention conditions are designed using  
15 data from a DCE, and the first PRCT that evaluates an intervention explicitly targeting  
16 preference heterogeneity. If successful, the methods used to understand how different groups of  
17 users value key characteristics of a health intervention can readily be applied to other settings in  
18 which interventions are being developed or adapted to optimize their efficacy. This work may  
19 demonstrate the utility of DCEs as a tool in implementation research to replace the costly  
20 practice of iteratively evaluating narrowly focused interventions. Thus, even as we apply this  
21 approach to the specific area of HIV testing, the study has potential to significantly advance the  
22 fields of patient-oriented research and implementation science. The methods could be used to  
23 develop new approaches to adapt effective interventions to local contexts, by informing *a priori*  
24 which interventions should be rolled out, and with which modifications, in order to maximize  
25 uptake across different populations and sub-populations.  
26  
27  
28  
29  
30  
31  
32  
33  
34  
35  
36  
37  
38  
39  
40

41 Our study design and implementation approach have several unique components. First, the  
42 implementation of the study, in collaboration with all HCT providers in the study area, allows for  
43 the evaluation of testing uptake in a nearly closed system. Second, the use of an automated  
44 mHealth system to send large numbers of SMS messages according to pre-specified algorithms  
45 reduces both error potential and cost. Third, the similarity between hypothetical choice  
46 scenarios presented in the DCE and actual HIV testing options given to participants allows for  
47 explicit comparisons between stated and revealed preferences. Fourth, the study design allows  
48 for separate estimates of the effects of reminder SMS, the issuance of physical HIV testing  
49  
50  
51  
52  
53  
54  
55  
56  
57  
58  
59  
60

1  
2  
3 invitation cards, and an incentive offer, on HIV testing rates. Finally, the approach for identifying  
4 the targeted, enhanced, and less-preferred options is not contingent on the use of RELCL  
5 analysis and proprietary software; instead it can be approximated using open source  
6 alternatives e.g., in R. In a sensitivity analysis we will evaluate the effect of specific model  
7 assumptions on the selection of testing options for the PRCT.  
8  
9  
10  
11  
12

13  
14 The study is subject to several limitations. First, feasibility considerations limit the study area to  
15 include only HCT facilities in Moshi municipality. While coded invitation cards collected from all  
16 HCT providers offer definitive evidence of a completed HIV test, participants may test without  
17 invitation cards, and may test outside the study area. Sensitivity analyses will characterize the  
18 effect of using only provider-documented testing uptake (primary outcome) vs. provider-  
19 documented or self-reported testing uptake (secondary outcome) on estimates.  
20  
21  
22  
23  
24  
25  
26

27  
28 Second, the preference estimates from the DCE, preference informed testing options, and  
29 estimated effect sizes are not generalizable to other high-risk groups in Tanzania or other parts  
30 of Africa. However, if this study is successful, it will support the broader use of stated preference  
31 methods to systematically elicit the preferences of key populations and facilitate corresponding  
32 adaptations to HIV testing options. We acknowledge that study eligibility criteria include literacy,  
33 and study procedures involve phone- and SMS-based contact with participants. While literacy in  
34 the region was 94.4% in 2000, and, in 2017, 93% of urban households had a mobile phone,<sup>62-64</sup>  
35 the exclusion of illiterate persons and limited mobile phone access may influence the results. It  
36 is also possible that individuals who are likely to move (and thus may not be enrolled or are lost  
37 to follow-up) may have different preferences and opportunities for HIV testing.  
38  
39  
40  
41  
42  
43  
44  
45  
46  
47  
48  
49

50 Third, participants' progression through multiple study phases may influence testing uptake in  
51 the PRCT. Ideally, all tangential intervention components (SMS reminders, invitation cards,  
52 incentives) could be evaluated alongside the preference-informed HIV testing offer as part of a  
53  
54  
55  
56  
57  
58  
59  
60

1  
2  
3 multi-arm RCT, however, the sample size required for such a trial is not feasible. A multi-stage  
4 enrollment approach and the inclusion of variables describing participants' exposure to SMS  
5 reminders, testing offers, and HIV tests in prior study phases as covariates allow us to estimate  
6 the direction and magnitude of such ordering effects on uptake. In our study we will not be able  
7 to estimate an unconditional effect of incentives on HIV testing uptake, as concurrent  
8 incentivized and non-incentivized testing offers were not considered viable among potentially  
9 closely-knit community members (e.g., barworkers in the same bar, porters climbing together).  
10  
11 Finally, DCE surveys contain a limited set of testing characteristics; the finite range of attributes  
12 and levels is a limitation of DCEs in general. Preference- and choice-relevant testing  
13 characteristics may differ in other settings, and changes in the testing environment and  
14 available testing options may occur during the study period. While adaptations to the preference  
15 survey and analysis of DCE data may be necessary and require technical expertise, such costs  
16 are expected to be far smaller than costs associated with large-scale, iterative trials of  
17 potentially ineffective HCT testing interventions.  
18

19 In conclusion, this study evaluates the critical link between preference-based intervention  
20 design and efficacy. If the PRCT indicates that a preference-informed, heterogeneity-focused  
21 HCT offer increases testing rates, the testing options evaluated in this study can be offered to  
22 high-risk populations in the study area, and the preference elicitation method and tools can be  
23 used to inform the design of testing options that better match the preferences of other high-risk  
24 populations, both locally and in other settings.  
25  
26  
27  
28  
29  
30  
31  
32  
33  
34  
35  
36  
37  
38  
39  
40  
41  
42  
43  
44  
45  
46  
47  
48  
49  
50

## 51 **Declarations**

## 52 **Ethics approvals**

1  
2  
3 The protocol was registered in ClinicalTrials.gov (Protocol NCT02714140) on March 21, 2016.  
4  
5 The protocol was approved by the Institutional Review Boards at Duke University (Duke  
6  
7 University Health System IRB, Protocol Pro00075996) and the University of South Carolina  
8  
9 (University of South Carolina IRB, facilitated review, Pro00060760) in the United States; as well  
10  
11 as the Ethics Review Committee at Kilimanjaro Christian Medical University College (Protocol  
12  
13 #901), the National Institute for Medical Research (NIMR/HQ/R.8a/Vol. IX/2603), and the  
14  
15 Tanzania Food & Drugs Authority (now Tanzania Medicines and Medical Devices Authority,  
16  
17 Authorization No. TZ18CT0017). Protocol amendments will be submitted to these entities as  
18  
19 required.  
20  
21  
22

### 23 **Data availability**

24  
25  
26 Findings from this study will be published in peer-reviewed journals. Data from the proposed  
27  
28 study will be stored in a data repository; these data will be de-identified so that they cannot be  
29  
30 linked back to individuals. Investigators wishing to use study data to answer new research  
31  
32 questions may submit data analysis concept proposals for consideration by the Principal  
33  
34 Investigators. The Principal Investigators will review the proposal and will provide those  
35  
36 submitting scientifically rigorous and promising proposals access to the data repository to  
37  
38 address their research questions.  
39  
40  
41

### 42 **Consent for publication**

43  
44  
45 All authors of the manuscript have read and agreed to its content and are accountable for all  
46  
47 aspects of the accuracy and integrity of the manuscript in accordance with ICMJE criteria.  
48  
49  
50

### 51 **Competing interests**

52  
53  
54 The authors declare that they have no competing interests.  
55  
56  
57  
58  
59  
60



## Funding

This study is supported by a grant from the National Institute of Mental Health (R01MH106388).

The funding body has no role in the design of the study, the collection, analysis, and interpretation of data, or writing of the manuscript.

## Authors' contributions

JO, NT, and BN conceptualized the study. AH, AM, BF, BN, DB, JO, and NT were involved in the development and submission of the funding application. All authors contributed to the development of the study protocol. JO and NT contributed equally to the development of this manuscript, wrote the first draft of the manuscript, and led subsequent revisions. MM developed the *comet* software for the collection of DCE data on iPads. AH, AM, AS, BF, BN, DB, JO, MLM, MM, MZ, NT, and TM read the manuscript and provided critical input. All authors read and approved the final manuscript.

## Acknowledgements

The authors are grateful to the study participants and to the study research assistants, Honoratha Israel, Beatrice Mandao, Elizabeth Mbuya, Yombya Madukwa, Leonia Rugalabamu, Suzan Kitomari, Stanny Komu, Blandina Zenze, Mohamed Mcharo, Upendo Nnko, Stephen Sikumbili, Edward Singo, and Beldad Mmari, for input on study procedures and study implementation.

The authors thank the staff of the Kilimanjaro Clinical Research Institute, especially Prof. Blandina Mmbaga and Zuhura Lintu; the University of South Carolina's Arnold School of Public Health, especially the Department of Health Services Policy & Management and the Center for Health Care Quality; the Duke Global Health Institute and Duke University's Center for Health

1  
2  
3 Policy and Inequalities Research, for administrative support; and members of the Duke Center  
4 for AIDS Research and the study's Scientific Advisory Board for feedback on study feasibility,  
5 design, analytic methods, and implementation.  
6  
7  
8

9  
10 Finally, the authors acknowledge Dr. Credianus Mgimba (Regional Medical Officer, Kilimanjaro  
11 Region), Dr. Best Magoma (former Regional Medical Officer, Kilimanjaro Region), Dr. Eligy  
12 Mosille (Regional AIDS Control Coordinator, Kilimanjaro Region), Ms. Dafrosa Itemba (Director,  
13 Tanzania Women Research Foundation), and members of the Moshi District Council  
14 administration, for their support of the study's development and implementation.  
15  
16  
17  
18  
19  
20  
21  
22  
23  
24  
25  
26  
27  
28  
29  
30  
31  
32  
33  
34  
35  
36  
37  
38  
39  
40  
41  
42  
43  
44  
45  
46  
47  
48  
49  
50  
51  
52  
53  
54  
55  
56  
57  
58  
59  
60

## List of abbreviations

|         |                                                              |
|---------|--------------------------------------------------------------|
| CTCs    | HIV care and treatment centres                               |
| CFTs    | Conditional financial transfers                              |
| DCE     | Discrete choice experiment                                   |
| FBW     | Female barworkers                                            |
| FGD     | Focus group discussion                                       |
| FU      | Follow-up                                                    |
| HCT     | HIV counseling and testing                                   |
| HIV     | Human Immunodeficiency Virus                                 |
| HSHP-IV | Tanzania's 2017-22 Health Sector HIV and AIDS Strategic Plan |
| IRB     | Institutional Review Board                                   |
| KCRI    | Kilimanjaro Clinical Research Institute                      |
| KMP     | Kilimanjaro mountain porters                                 |
| LMICs   | Low- and middle-income countries                             |
| mHealth | Mobile health                                                |
| mParis  | Mobile phone assisted reminder and incentive system          |
| NIMR    | National Institute for Medical Research                      |
| PLWH    | Persons living with HIV                                      |
| PRCT    | Pragmatic randomized controlled trial                        |
| RELCL   | Random effects latent class logit                            |
| SMS     | Short messaging system (text messages)                       |
| UNAIDS  | Joint United Nations Programme on HIV and AIDS               |

**Table 1. HIV testing options offered across the three study arms in the pragmatic randomized controlled trial**

| Arm      | Offers                   | Description                                                                                                                                                                                             |
|----------|--------------------------|---------------------------------------------------------------------------------------------------------------------------------------------------------------------------------------------------------|
| <b>1</b> | 1 common option          | Combines the on average most preferred levels of each attribute included in the DCE, as described by the mean parameter estimates from a mixed logit model.                                             |
|          | 3 targeted options       | Comprise features <i>widely available</i> in the study area and are predicted to be jointly more-preferred than the common option by the largest possible share of participants.                        |
| <b>2</b> | 1 common option          | Combines the on average most preferred levels of each attribute included in the DCE, as described by the mean parameter estimates from a mixed logit model.                                             |
|          | 3 enhanced options       | Include additional features that are <i>not yet widely available</i> in the study area and predicted to be jointly more-preferred than the common option by the largest possible share of participants. |
| <b>3</b> | 1 common option          | Combines the on average most preferred levels of each attribute included in the DCE, as described by the mean parameter estimates from a mixed logit model.                                             |
|          | 3 less preferred options | Includes options that are widely available in the study area and jointly predicted to be equally or less-preferred than the common option by the largest possible share of participants.                |

DCE = Discrete Choice Experiment

**Table 2. Schedule of activities**

| Phase                | Time point        | Target timing         | Key activity                                       | Key information collected                                            |
|----------------------|-------------------|-----------------------|----------------------------------------------------|----------------------------------------------------------------------|
| <b>A</b>             | $t_A$             | Enrollment            | Baseline survey                                    | HIV testing preferences, history, HIV risk, socio-demographics       |
|                      | $t_{Afu} = t_B^*$ | $t_A + 91$ days       | Phone-based FU                                     | HIV testing uptake since $t_A$                                       |
| <b>B</b>             | $t_{Bs}$          | $t_B + 28$ days       | SMS reminder                                       |                                                                      |
|                      | $t_{Bfu}$         | $t_B + 91$ days       | Phone-based FU                                     | HIV testing uptake since $t_B$                                       |
| <b>C<sup>#</sup></b> | $t_{Cx} = t_C$    | $t_{Bfu} + < 91$ days | Testing invitation ("common" option)               |                                                                      |
|                      | $t_{Cs}$          | $t_C + 28$ days       | SMS reminder                                       |                                                                      |
|                      | $t_{Cfu}$         | $t_C + 91$ days       | Card collection from testing sites, phone-based FU | HIV testing uptake since $t_C$                                       |
| <b>D<sup>#</sup></b> | $t_{Cx} = t_D$    | $t_{Cfu} + < 91$ days | 4 testing invitations, study arm specific          |                                                                      |
|                      | $t_{Ds}$          | $t_D + 28$ days       | SMS reminder                                       |                                                                      |
|                      | $t_{Dfu}$         | $t_D + 91$ days       | Card collection from testing sites, phone-based FU | HIV testing uptake since $t_D$                                       |
| <b>E</b>             | $t_E$             | $t_{Dfu} + < 91$ days | Phone call and SMS message with incentive offer    |                                                                      |
|                      | $t_{Es}$          | $t_D + 28$ days       | SMS reminder                                       |                                                                      |
|                      | $t_{Efu}$         | $t_E + 91$ days       | Card collection from testing sites, phone-based FU | Choice among testing options offered, HIV testing uptake since $t_E$ |

\* The phone-based follow-up at the end of Phase A constitutes the beginning of phase B

# To reduce variability across participants in the timing of Phase D, some participants may be enrolled directly into Phases C and D. FU: follow-up

## References

1. UNAIDS. UNAIDS Data 2019. 2019.
2. Sweat M, Gregorich S, Sangiwa G, et al. Cost-effectiveness of voluntary HIV-1 counselling and testing in reducing sexual transmission of HIV-1 in Kenya and Tanzania. *Lancet*. 2000;356(9224):113-121.
3. Thielman NM, Chu HY, Ostermann J, et al. Cost-effectiveness of free HIV voluntary counseling and testing through a community-based AIDS service organization in Northern Tanzania. *Am J Public Health*. 2006;96(1):114-119.
4. Dieffenbach CW, Fauci AS. Universal voluntary testing and treatment for prevention of HIV transmission. *JAMA*. 2009;301(22):2380-2382.
5. Cohen MS, Chen YQ, McCauley M, et al. Prevention of HIV-1 infection with early antiretroviral therapy. *N Engl J Med*. 2011;365(6):493-505.
6. Fauci AS, Folkers GK, Dieffenbach CW. Hiv-Aids: Much Accomplished, Much to Do. *Nat Immunol*. 2013;14(11):1104-1107.
7. UNAIDS. 90-90-90. An ambitious treatment target to help end the AIDS epidemic. 2014; [http://www.unaids.org/sites/default/files/media\\_asset/90-90-90\\_en.pdf](http://www.unaids.org/sites/default/files/media_asset/90-90-90_en.pdf). Accessed August 7, 2018.
8. The Lancet Editors. Divergent paths to the end of AIDS. *Lancet HIV*. 2017;4(9):e375.
9. Granich RM, Gilks CF, Dye C, De Cock KM, Williams BG. Universal voluntary HIV testing with immediate antiretroviral therapy as a strategy for elimination of HIV transmission: a mathematical model. *Lancet*. 2009;373(9657):48-57.
10. National AIDS Control Programme MoH, Community Development, Gender, Elderly and Children. Health Sector HIV and AIDS Strategic Plan (HSHSP Iv) 2017–2022. 2017.

- 1  
2  
3 11. Angotti N, Bula A, Gaydos L, Kimchi EZ, Thornton RL, Yeatman SE. Increasing the  
4 acceptability of HIV counseling and testing with three C's: Convenience, confidentiality  
5 and credibility. *Soc Sci Med*. 2009;68(12):2263-2270.  
6  
7
- 8  
9 12. Negin J, Wariero J, Mutuo P, Jan S, Pronyk P. Feasibility, acceptability and cost of  
10 home-based HIV testing in rural Kenya. *Trop Med Int Health*. 2009;14(8):849-855.  
11  
12
- 13 13. Sabapathy K, Van den Bergh R, Fidler S, Hayes R, Ford N. Uptake of Home-Based  
14 Voluntary HIV Testing in Sub-Saharan Africa: A Systematic Review and Meta-Analysis.  
15 *PLoS Med*. 2012;9(12):e1001351.  
16  
17
- 18  
19 14. Baggaley R, Hensen B, Ajose O, et al. From caution to urgency: the evolution of HIV  
20 testing and counselling in Africa. *Bull World Health Organ*. 2012;90(9):652-658B.  
21  
22
- 23 15. Roura M, Watson-Jones D, Kahawita TM, Ferguson L, Ross DA. Provider-initiated  
24 testing and counselling programmes in sub-Saharan Africa: a systematic review of their  
25 operational implementation. *AIDS*. 2013;27(4):617-626.  
26  
27
- 28  
29 16. Topp SM, Chipukuma JM, Chiko MM, Wamulume CS, Bolton-Moore C, Reid SE. Opt-  
30 out provider-initiated HIV testing and counselling in primary care outpatient clinics in  
31 Zambia. *Bull World Health Organ*. 2011;89(5):328-335A.  
32  
33
- 34 17. Wanyenze R, Kanya M, Liechty CA, et al. HIV counseling and testing practices at an  
35 urban hospital in Kampala, Uganda. *AIDS and Behavior*. 2006;10(4):361-367.  
36  
37
- 38  
39 18. Corbett EL, Marston B, Churchyard GJ, De Cock KM. Tuberculosis in sub-Saharan  
40 Africa: opportunities, challenges, and change in the era of antiretroviral treatment.  
41 *Lancet*. 2006;367(9514):926-937.  
42  
43
- 44 19. Houdmont J, Munir F, Grey M. Acceptance of repeat worksite HIV voluntary counselling  
45 and testing in a rural South African factory. *AIDS care*. 2013;25(9):1199-1202.  
46  
47
- 48  
49 20. Ostermann J, Njau B, Mtuy T, Brown DS, Muhlbacher A, Thielman N. One size does not  
50 fit all: HIV testing preferences differ among high-risk groups in Northern Tanzania. *AIDS*  
51 *Care*. 2015;27(5):595-603.  
52  
53  
54  
55  
56  
57  
58  
59

- 1
- 2
- 3 21. Ostermann J, Njau B, Brown DS, Muhlbacher A, Thielman N. Heterogeneous HIV
- 4 testing preferences in an urban setting in Tanzania: results from a discrete choice
- 5 experiment. *PloS one*. 2014;9(3):e92100.
- 6
- 7
- 8
- 9 22. Njau B, Ostermann J, Brown D, Muhlbacher A, Reddy E, Thielman N. HIV testing
- 10 preferences in Tanzania: a qualitative exploration of the importance of confidentiality,
- 11 accessibility, and quality of service. *BMC Public Health*. 2014;14:838.
- 12
- 13
- 14
- 15 23. Muhlbacher A, Johnson FR. Choice Experiments to Quantify Preferences for Health and
- 16 Healthcare: State of the Practice. *Appl Health Econ Health Policy*. 2016;14(3):253-266.
- 17
- 18
- 19 24. Hensher DA, Rose JM, Greene WH. *Applied choice analysis : a primer*. Cambridge ;
- 20 New York: Cambridge University Press; 2005.
- 21
- 22
- 23
- 24 25. Louviere JJ, Hensher DA, Swait JD. *Stated choice methods : analysis and applications*.
- 25 Cambridge, UK ; New York, NY, USA: Cambridge University Press; 2000.
- 26
- 27
- 28 26. Ryan M, Gerard K, Amaya-Amaya M. *Using discrete choice experiments to value health*
- 29 *and health care*. Dordrecht, The Netherlands: Springer; 2008.
- 30
- 31
- 32 27. Ryan M, Farrar S. Using conjoint analysis to elicit preferences for health care. *Brit Med*
- 33 *J*. 2000;320(7248):1530-1533.
- 34
- 35
- 36
- 37 28. Johnson FR, Ozdemir S, Phillips KA. Effects of simplifying choice tasks on estimates of
- 38 taste heterogeneity in stated-choice surveys. *Soc Sci Med*. 2010;70(2):183-190.
- 39
- 40
- 41 29. Indravudh PP, Sibanda EL, d'Elbee M, et al. 'I will choose when to test, where I want to
- 42 test': investigating young people's preferences for HIV self-testing in Malawi and
- 43 Zimbabwe. *AIDS*. 2017;31 Suppl 3:S203-S212.
- 44
- 45
- 46
- 47 30. Phillips KA, Maddala T, Johnson FR. Measuring preferences for health care
- 48 interventions using conjoint analysis: an application to HIV testing. *Health Serv Res*.
- 49 2002;37(6):1681-1705.
- 50
- 51
- 52
- 53
- 54
- 55
- 56
- 57
- 58
- 59
- 60



- 1  
2  
3 31. Strauss M, George GL, Rhodes BD. Determining Preferences Related to HIV  
4 Counselling and Testing Services Among High School Learners in KwaZulu-Natal: A  
5 Discrete Choice Experiment. *AIDS Behav.* 2018;22(1):64-76.  
6  
7
- 8  
9 32. Ostermann J, Njau B, Brown DS, Mühlbacher A, Thielman N. Heterogeneous HIV  
10 Testing Preferences in an Urban Setting in Tanzania: Results from a Discrete Choice  
11 Experiment. *PLoS one.* 2014;9(3):e92100.  
12  
13
- 14  
15 33. Quaife M, Eakle R, Cabrera Escobar MA, et al. Divergent Preferences for HIV  
16 Prevention: A Discrete Choice Experiment for Multipurpose HIV Prevention Products in  
17 South Africa. *Med Decis Making.* 2018;38(1):120-133.  
18  
19
- 20  
21 34. Cameron MP, Newman PA, Rongprakhon S, Scarpa R. The marginal willingness-to-  
22 pay for attributes of a hypothetical HIV vaccine. *Vaccine.* 2013;31(36):3712-3717.  
23  
24
- 25  
26 35. Newman PA, Cameron MP, Rongprakhon S, Tepjan S, Scarpa R. Acceptability and  
27 Preferences for Hypothetical Rectal Microbicides among a Community Sample of Young  
28 Men Who Have Sex with Men and Transgender Women in Thailand: A Discrete Choice  
29 Experiment. *AIDS Behav.* 2016;20(11):2588-2601.  
30  
31
- 32  
33 36. Terris-Prestholt F, Hanson K, MacPhail C, Vickerman P, Rees H, Watts C. How Much  
34 Demand for New HIV Prevention Technologies Can We Really Expect? Results from a  
35 Discrete Choice Experiment in South Africa. *PLoS one.* 2013;8(12).  
36  
37
- 38  
39 37. Zanolini A, Sikombe K, Sikazwe I, et al. Understanding preferences for HIV care and  
40 treatment in Zambia: Evidence from a discrete choice experiment among patients who  
41 have been lost to follow-up. *PLoS Med.* 2018;15(8):e1002636.  
42  
43
- 44  
45 38. Kruk ME, Riley PL, Palma AM, et al. How Can the Health System Retain Women in HIV  
46 Treatment for a Lifetime? A Discrete Choice Experiment in Ethiopia and Mozambique.  
47 *PLoS one.* 2016;11(8):e0160764.  
48  
49
- 50  
51 39. d'Elbee M, Indravudh PP, Mwenge L, et al. Preferences for linkage to HIV care services  
52 following a reactive self-test: discrete choice experiments in Malawi and Zambia. *AIDS.*  
53 2018;32(14):2043-2049.  
54  
55  
56  
57  
58  
59

- 1
- 2
- 3 40. Beusterien KM, Dziekan K, Schrader S, et al. Patient preferences among third agent HIV
- 4 medications: a US and German perspective. *AIDS Care*. 2007;19(8):982-988.
- 5
- 6
- 7 41. Bregigeon-Ronot S, Cheret A, Cabie A, et al. Evaluating patient preference and
- 8 satisfaction for human immunodeficiency virus therapy in France. *Patient Prefer*
- 9 *Adherence*. 2017;11:1159-1169.
- 10
- 11
- 12
- 13 42. Hauber AB, Mohamed AF, Watson ME, Johnson FR, Hernandez JE. Benefits, risk, and
- 14 uncertainty: preferences of antiretroviral-naive African Americans for HIV treatments.
- 15 *AIDS Patient Care STDS*. 2009;23(1):29-34.
- 16
- 17
- 18
- 19 43. Mühlbacher AC, Stoll M, Mahlich J, Nübling M. Patient preferences for HIV/AIDS therapy
- 20 - a discrete choice experiment. *Health Econ Rev*. 2013;3(1):14.
- 21
- 22
- 23
- 24 44. J O, A M, D B, et al. Heterogeneous Patient Preferences for Modern Antiretroviral
- 25 Therapy: Results of a Discrete Choice Experiment. *Value in Health*. 2020.
- 26
- 27
- 28 45. United Republic of Tanzania, National Bureau of Statistics. 2012 Tanzania Population
- 29 and Housing Census. 2012;
- 30 [https://www.nbs.go.tz/nbs/takwimu/census2012/Tanzania\\_Total\\_Population\\_by\\_District-](https://www.nbs.go.tz/nbs/takwimu/census2012/Tanzania_Total_Population_by_District-Regions-2016_2017r.pdf)
- 31 [Regions-2016\\_2017r.pdf](https://www.nbs.go.tz/nbs/takwimu/census2012/Tanzania_Total_Population_by_District-Regions-2016_2017r.pdf). Accessed December 1, 2019.
- 32
- 33
- 34
- 35 46. Ostermann J, Whetten K, Reddy E, et al. Treatment retention and care transitions during
- 36 and after the scale-up of HIV care and treatment in Northern Tanzania. *AIDS care*.
- 37 2014;26(11):1352-1358.
- 38
- 39
- 40
- 41 47. Mitchell J, Keane J, Laidlaw J. Making success work for the poor: Package tourism in
- 42 Northern Tanzania. Arusha, Tanzania: Overseas Development Institute, SNV
- 43 *Connecting People's Capacities*;2009.
- 44
- 45
- 46
- 47 48. Peaty D. Kilimanjaro Tourism and What It Means for Local Porters and for the Local
- 48 Environment. *Journal of Ritsumeikan Social Sciences and Humanities*. 2012;4:1-12.
- 49
- 50
- 51
- 52 49. Lancsar E, Louviere J. Conducting discrete choice experiments to inform healthcare
- 53 decision making: a user's guide. *Pharmacoeconomics*. 2008;26(8):661-677.
- 54
- 55
- 56
- 57
- 58
- 59
- 60

- 1  
2  
3 50. Johnson F, Kanninen B, Bingham M, Özdemir S. Experimental design for stated choice  
4 studies. In: BJ K, ed. Valuing environmental amenities using stated choice studies.  
5 Dordrecht: Springer; 2007.  
6  
7
- 8  
9 51. Hole AR. Fitting mixed logit models by using maximum simulated likelihood. The Stata  
10 Journal. 2007;7(3):388-401.  
11  
12
- 13 52. Hensher DA, Rose JM, Greene WH. Applied choice analysis. 2nd edition. ed.  
14 Cambridge: Cambridge University Press; 2015.  
15  
16
- 17 53. Zhou M, Bridges J. Explore preference heterogeneity for treatment among people with  
18 Type 2 diabetes: A comparison of random-parameters and latent-class estimation  
19 techniques. J Choice Model. 2019;30(March 2019):38-49.  
20  
21  
22
- 23 54. Ostermann J, Vasudevan L, Van Zwetselaar M, Moses S, Engadaya E, Mfinanga S.  
24 Mobile Phone Assisted Reminder and Incentive System (mParis). Integrating mHealth  
25 reminders and conditional cash transfers to improve the timeliness of vaccinations in  
26 Tanzania. Poster presented at 2018 NIH mHealth Technology Showcase for Health  
27 Research; 2018; Washington, D.C.  
28  
29  
30  
31
- 32 55. Ostermann J, Vasudevan L, Baumgartner JN, Ngadaya E, Mfinanga SG. Do mobile  
33 phone-based reminders and conditional financial transfers improve the timeliness of  
34 childhood vaccinations in Tanzania? Study protocol for a quasi-randomized controlled  
35 trial. Trials. 2019;20(1):397.  
36  
37  
38  
39
- 40 56. Ostermann J, Brown DS, Muhlbacher A, Njau B, Thielman N. Would you test for 5000  
41 Shillings? HIV risk and willingness to accept HIV testing in Tanzania. Health Econ Rev.  
42 2015;5(1):60.  
43  
44  
45
- 46 57. Ministry of Health Community Development Gender Elderly and Children. National AIDS  
47 Control Programme. Health Sector HIV and AIDS Strategic Plan (HSHSP IV) 2017–  
48 2022. 2017; <http://www.nacp.go.tz/site/news/HSHSPIV.pdf>. Accessed July 11, 2018.  
49  
50  
51
- 52 58. Welfare MoHaS, Tanzania TURo. National Comprehensive Guidelines for HIV Testing  
53 and Counseling. In: (NACP) NACP, ed. Dar es Salaam 2013.  
54  
55  
56  
57  
58  
59

- 1  
2  
3 59. Yang JC, Johnson FR, Kilambi V, Mohamed AF. Sample size and utility-difference  
4 precision in discrete-choice experiments: A meta-simulation approach. *J Choice Model.*  
5 2015;16:50-57.  
6  
7  
8  
9 60. Orme B. *Getting Started with Conjoint Analysis: Strategies for Product Design and*  
10 *Pricing Research.* 2nd ed. Madison, Wis: Research Publishers LLC; 2010.  
11  
12  
13 61. Zwarenstein M, Treweek S, Gagnier JJ, et al. Improving the reporting of pragmatic trials:  
14 an extension of the CONSORT statement. *BMJ.* 2008;337:a2390.  
15  
16  
17 62. National Bureau of Statistics, (OCGS) OotCGS. *National Population Projections.* 2018;  
18 <http://www.nbs.go.tz/nbs/takwimu/census2012/Projection-Report-20132035.pdf>.  
19 Accessed August 22, 2018.  
20  
21  
22  
23 63. Tanzania Communications Regulatory Authority. *Quarterly Communications Statistics.*  
24 2018;  
25  
26 [https://www.tcra.go.tz/images/documents/reports/TelCom\\_Statistics\\_June\\_2018.pdf](https://www.tcra.go.tz/images/documents/reports/TelCom_Statistics_June_2018.pdf).  
27 Accessed August 22, 2018.  
28  
29  
30  
31 64. Ministry of Health Community Development Gender Elderly and Children (MoHCDGEC)  
32 [Tanzania Mainland], Ministry of Health (MoH) [Zanzibar], National Bureau of Statistics  
33 (NBS), Office of the Chief Government Statistician (OCGS), ICF. *TANZANIA. Malaria*  
34 *Indicator Survey 2017.* 2017; <https://www.dhsprogram.com/pubs/pdf/MIS31/MIS31.pdf>.  
35 Accessed April 29, 2019.  
36  
37  
38  
39  
40  
41  
42  
43  
44  
45  
46  
47  
48  
49  
50  
51  
52  
53  
54  
55  
56  
57  
58  
59  
60

## Figure Legend

Figure 1. Study design

For peer review only

1  
2  
3  
4  
5  
6  
7  
8  
9  
10  
11  
12  
13  
14  
15  
16  
17  
18  
19  
20  
21  
22  
23  
24  
25  
26  
27  
28  
29  
30  
31  
32  
33  
34  
35  
36  
37  
38  
39  
40  
41  
42  
43  
44  
45  
46  
47  
48  
49  
50  
51  
52  
53  
54  
55  
56  
57  
58  
59  
60

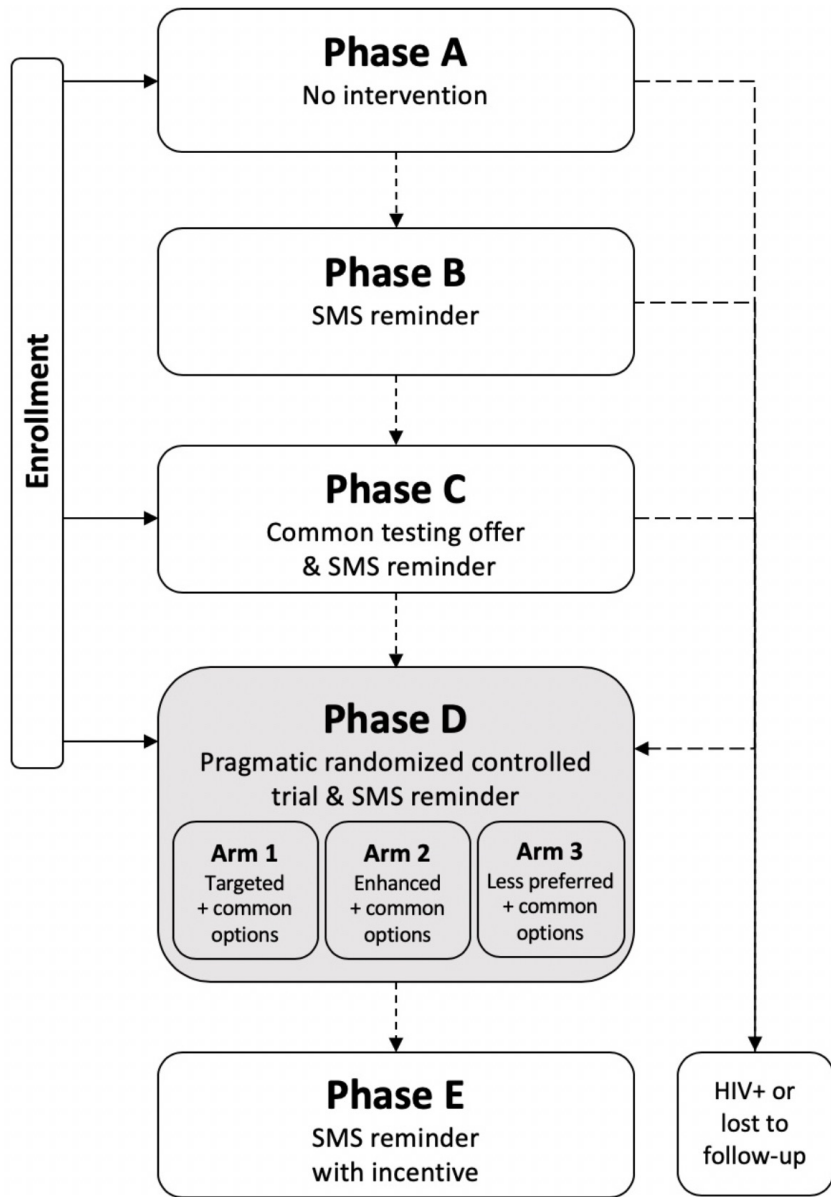

Figure 1. Study design

205x294mm (144 x 144 DPI)

1  
2  
3 **Supplemental File 1. CONSORT checklist for pragmatic randomized controlled trials**  
4

5  
6  
7  
8  
9  
10  
11  
12  
13  
14  
15  
16  
17  
18  
19  
20  
21  
22  
23  
24  
25  
26  
27  
28  
29  
30  
31  
32  
33  
34  
35  
36  
37  
38  
39  
40  
41  
42  
43  
44  
45  
46  
47  
48  
49  
50  
51  
52  
53  
54  
55  
56  
57  
58  
59  
60

| SECTION and topic   | Item # | Descriptor <sup>1</sup>                                                                                                                                                                                                                                                                                                                                                                                                                | Reported on page # |
|---------------------|--------|----------------------------------------------------------------------------------------------------------------------------------------------------------------------------------------------------------------------------------------------------------------------------------------------------------------------------------------------------------------------------------------------------------------------------------------|--------------------|
| TITLE & ABSTRACT    | 1      | How participants were allocated to interventions (e.g., random allocation", "randomized", or "randomly assigned").                                                                                                                                                                                                                                                                                                                     | 2                  |
| <b>INTRODUCTION</b> |        |                                                                                                                                                                                                                                                                                                                                                                                                                                        |                    |
| Background          | 2      | Scientific background and explanation of rationale.<br><br><b>EXT:</b> Describe the health or health service problem that the intervention is intended to address and other interventions that may commonly be aimed at this problem.                                                                                                                                                                                                  | 6                  |
| <b>METHODS</b>      |        |                                                                                                                                                                                                                                                                                                                                                                                                                                        |                    |
| Participants        | 3      | Eligibility criteria for participants and the settings and locations where the data were collected.<br><br><b>EXT:</b> Eligibility criteria should be explicitly framed to show the degree to which they include typical participants and/or, where applicable, typical providers (eg, nurses), institutions (eg, hospitals), communities (or localities eg, towns) and settings of care (eg, different healthcare financing systems). | 8                  |

| SECTION and topic | Item # | Descriptor <sup>1</sup>                                                                                                                                                                                                                                                                                                                                                                                                                                                                                 | Reported on page # |
|-------------------|--------|---------------------------------------------------------------------------------------------------------------------------------------------------------------------------------------------------------------------------------------------------------------------------------------------------------------------------------------------------------------------------------------------------------------------------------------------------------------------------------------------------------|--------------------|
| Interventions     | 4      | <p>Precise details of the interventions intended for each group and how and when they were actually administered.</p> <p><b>EXT:</b> Describe extra resources added to (or resources removed from) usual settings in order to implement intervention. Indicate if efforts were made to standardise the intervention or if the intervention and its delivery were allowed to vary between participants, practitioners, or study sites. Describe the comparator in similar detail to the intervention</p> | 9, 12              |
| Objectives        | 5      | Specific objectives and hypotheses.                                                                                                                                                                                                                                                                                                                                                                                                                                                                     | 8                  |
| Outcomes          | 6      | <p>Clearly defined primary and secondary outcome measures and, when applicable, any methods used to enhance the quality of measurements (e.g., multiple observations, training of assessors).</p> <p><b>EXT:</b> Explain why the chosen outcomes and, when relevant, the length of follow-up are considered important to those who will use the results of the trial</p>                                                                                                                                | 5, 22              |
| Sample size       | 7      | <p>How sample size was determined and, when applicable, explanation of any interim analyses and stopping rules.</p> <p><b>EXT:</b> If calculated using the smallest difference considered important by the target decision maker audience (the minimally important difference) then report where this difference was obtained</p>                                                                                                                                                                       | 21                 |



| SECTION and topic      | Item # | Descriptor <sup>1</sup>                                                                                                                                                                                                                                                         | Reported on page # |
|------------------------|--------|---------------------------------------------------------------------------------------------------------------------------------------------------------------------------------------------------------------------------------------------------------------------------------|--------------------|
| Randomization:         |        |                                                                                                                                                                                                                                                                                 |                    |
| Sequence generation    | 8      | Method used to generate the random allocation sequence, including details of any restriction (e.g., blocking, stratification).                                                                                                                                                  | 12                 |
| Allocation concealment | 9      | Method used to implement the random allocation sequence (e.g., numbered containers or central telephone), clarifying whether the sequence was concealed until interventions were assigned.                                                                                      | 12                 |
| Implementation         | 10     | Who generated the allocation sequence, who enrolled participants, and who assigned participants to their groups.                                                                                                                                                                | 12                 |
| Blinding (Masking)     | 11     | <p>Whether or not participants, those administering the interventions, and those assessing the outcomes were blinded to group assignment. If done, how the success of blinding was evaluated.</p> <p><b>EXT:</b> If blinding was not done, or was not possible, explain why</p> | 18                 |
| Statistical methods    | 12     | Statistical methods used to compare groups for primary outcome(s); Methods for additional analyses, such as subgroup analyses and adjusted analyses.                                                                                                                            | 20                 |
| <b>RESULTS</b>         |        |                                                                                                                                                                                                                                                                                 |                    |

| SECTION and topic       | Item # | Descriptor <sup>1</sup>                                                                                                                                                                                                                                                                                                                                                                                                                                                                                                               | Reported on page # |
|-------------------------|--------|---------------------------------------------------------------------------------------------------------------------------------------------------------------------------------------------------------------------------------------------------------------------------------------------------------------------------------------------------------------------------------------------------------------------------------------------------------------------------------------------------------------------------------------|--------------------|
| Participant flow        | 13     | <p>Flow of participants through each stage (a diagram is strongly recommended). Specifically, for each group report the numbers of participants randomly assigned, receiving intended treatment, completing the study protocol, and analyzed for the primary outcome. Describe protocol deviations from study as planned, together with reasons.</p> <p><b>EXT:</b> The number of participants or units approached to take part in the trial, the number which were eligible, and reasons for nonparticipation should be reported</p> | 19                 |
| Recruitment             | 14     | Dates defining the periods of recruitment and follow-up.                                                                                                                                                                                                                                                                                                                                                                                                                                                                              | n/a                |
| Baseline data           | 15     | Baseline demographic and clinical characteristics of each group.                                                                                                                                                                                                                                                                                                                                                                                                                                                                      | n/a                |
| Numbers analyzed        | 16     | Number of participants (denominator) in each group included in each analysis and whether the analysis was by intention-to-treat". State the results in absolute numbers when feasible (e.g., 10/20, not 50%).                                                                                                                                                                                                                                                                                                                         | 17                 |
| Outcomes and Estimation | 17     | For each primary and secondary outcome, a summary of results for each group, and the estimated effect size and its precision (e.g., 95% confidence interval).                                                                                                                                                                                                                                                                                                                                                                         | n/a                |

| SECTION and topic  | Item # | Descriptor <sup>1</sup>                                                                                                                                                                                                                                                                                                | Reported on page # |
|--------------------|--------|------------------------------------------------------------------------------------------------------------------------------------------------------------------------------------------------------------------------------------------------------------------------------------------------------------------------|--------------------|
| Ancillary analyses | 18     | Address multiplicity by reporting any other analyses performed, including subgroup analyses and adjusted analyses, indicating those pre-specified and those exploratory.                                                                                                                                               | n/a                |
| Adverse events     | 19     | All important adverse events or side effects in each intervention group.                                                                                                                                                                                                                                               | n/a                |
| DISCUSSION         |        |                                                                                                                                                                                                                                                                                                                        |                    |
| Interpretation     | 20     | Interpretation of the results, taking into account study hypotheses, sources of potential bias or imprecision and the dangers associated with multiplicity of analyses and outcomes.                                                                                                                                   | n/a                |
| Generalizability   | 21     | Generalizability (external validity) of the trial findings.<br><br><b>EXT:</b> Describe key aspects of the setting which determined the trial results. Discuss possible differences in other settings where clinical traditions, health service organisation, staffing, or resources may vary from those of the trial. | n/a                |
| Overall evidence   | 22     | General interpretation of the results in the context of current evidence.                                                                                                                                                                                                                                              | n/a                |

<sup>1</sup> EXT denotes a pragmatic trial extension of the CONSORT statement.

<https://www.bmj.com/content/bmj/337/bmj.a2390.full.pdf>

## Supplemental File 2: WHO Trial Registration Data Set

| Data category                                 | Information                                                                                                                                                                                                                                                                                                                                                                                          |
|-----------------------------------------------|------------------------------------------------------------------------------------------------------------------------------------------------------------------------------------------------------------------------------------------------------------------------------------------------------------------------------------------------------------------------------------------------------|
| Primary registry and trial identifying number | ClinicalTrials.gov<br>NCT02714140                                                                                                                                                                                                                                                                                                                                                                    |
| Date of registration in primary registry      | March 21, 2016                                                                                                                                                                                                                                                                                                                                                                                       |
| Secondary identifying numbers                 | N/A                                                                                                                                                                                                                                                                                                                                                                                                  |
| Source of monetary/material support           | National Institute of Mental Health (R01MH106388)<br>6001 Executive Boulevard<br>Bethesda, MD 20892-9663                                                                                                                                                                                                                                                                                             |
| Primary sponsor                               | University of South Carolina, USA                                                                                                                                                                                                                                                                                                                                                                    |
| Secondary sponsor(s)                          | Kilimanjaro Christian Medical Centre, Tanzania                                                                                                                                                                                                                                                                                                                                                       |
| Contact for public queries                    | Jan Ostermann, PhD<br>Ph: 8037778747<br><a href="mailto:jano@mailbox.sc.edu">jano@mailbox.sc.edu</a><br>Nathan Thielman, MD<br>Ph: 9196681721<br><a href="mailto:n.thielman@duke.edu">n.thielman@duke.edu</a>                                                                                                                                                                                        |
| Contact for scientific queries                | Jan Ostermann, PhD<br>Ph: 8037778747<br><a href="mailto:jano@mailbox.sc.edu">jano@mailbox.sc.edu</a><br>Nathan Thielman, MD<br>Ph: 9196681721<br><a href="mailto:n.thielman@duke.edu">n.thielman@duke.edu</a>                                                                                                                                                                                        |
| Public title                                  | Does Preference-based HIV Testing Increase Uptake in High Risk Populations?                                                                                                                                                                                                                                                                                                                          |
| Scientific title                              | Using DCEs to Identify and Match Preferences for HIV/AIDS Counseling and Testing (DCE-IMPACT)                                                                                                                                                                                                                                                                                                        |
| Countries of recruitment                      | Tanzania                                                                                                                                                                                                                                                                                                                                                                                             |
| Health conditions or problems studied         | HIV, HIV testing                                                                                                                                                                                                                                                                                                                                                                                     |
| Intervention(s)                               | Behavioral: Invitation cards<br>Behavioral: Reminders<br>Behavioral: Conditional economic transfers                                                                                                                                                                                                                                                                                                  |
| Key inclusion and exclusion criteria          | Ages Eligible for Study: 18 Years and older<br>Sexes Eligible for Study: Any<br>Accepts Healthy Volunteers: Yes<br>Inclusion criteria: Women employed in bars, restaurants and guesthouses serving alcohol to patrons ("female barworkers") and male mountain porters who are supporting climbers of nearby Mount Kilimanjaro ("Kilimanjaro mountain porters")<br>Exclusion criteria: Unable to read |
| Study type                                    | Interventional (Clinical Trial)                                                                                                                                                                                                                                                                                                                                                                      |
| Date of first enrolment                       | 12-February-2019                                                                                                                                                                                                                                                                                                                                                                                     |
| Target sample size                            | 1200                                                                                                                                                                                                                                                                                                                                                                                                 |
| Recruitment status                            | Ongoing                                                                                                                                                                                                                                                                                                                                                                                              |
| Primary outcome(s)                            | Uptake of HIV testing                                                                                                                                                                                                                                                                                                                                                                                |
| Key secondary outcomes                        | N/A                                                                                                                                                                                                                                                                                                                                                                                                  |

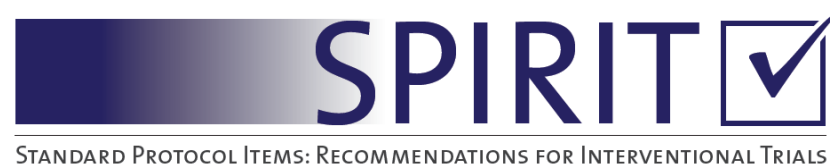

**Supplemental File 3. SPIRIT 2013 Checklist: Recommended items to address in a clinical trial protocol and related documents\***

| Section/item                      | Item No | Description                                                                                                                                                                                                                                                                              | Addressed on page number |
|-----------------------------------|---------|------------------------------------------------------------------------------------------------------------------------------------------------------------------------------------------------------------------------------------------------------------------------------------------|--------------------------|
| <b>Administrative information</b> |         |                                                                                                                                                                                                                                                                                          |                          |
| Title                             | 1       | Descriptive title identifying the study design, population, interventions, and, if applicable, trial acronym                                                                                                                                                                             | 1                        |
| Trial registration                | 2a      | Trial identifier and registry name. If not yet registered, name of intended registry                                                                                                                                                                                                     | 26                       |
|                                   | 2b      | All items from the World Health Organization Trial Registration Data Set                                                                                                                                                                                                                 | Supplementary File 2     |
| Protocol version                  | 3       | Date and version identifier                                                                                                                                                                                                                                                              | 26                       |
| Funding                           | 4       | Sources and types of financial, material, and other support                                                                                                                                                                                                                              | 28                       |
| Roles and responsibilities        | 5a      | Names, affiliations, and roles of protocol contributors                                                                                                                                                                                                                                  | 28                       |
|                                   | 5b      | Name and contact information for the trial sponsor                                                                                                                                                                                                                                       | Supplementary File 2     |
|                                   | 5c      | Role of study sponsor and funders, if any, in study design; collection, management, analysis, and interpretation of data; writing of the report; and the decision to submit the report for publication, including whether they will have ultimate authority over any of these activities | 28                       |
|                                   | 5d      | Composition, roles, and responsibilities of the coordinating centre, steering committee, endpoint adjudication committee, data management team, and other individuals or groups overseeing the trial, if applicable (see Item 21a for data monitoring committee)                         | N/A                      |

|    |                                                           |     |                                                                                                              |              |
|----|-----------------------------------------------------------|-----|--------------------------------------------------------------------------------------------------------------|--------------|
| 1  | <b>Introduction</b>                                       |     |                                                                                                              |              |
| 2  |                                                           |     |                                                                                                              |              |
| 3  | Background and                                            | 6a  | Description of research question and justification for undertaking the trial, including summary of           | 6-8          |
| 4  | rationale                                                 |     | relevant studies (published and unpublished) examining benefits and harms for each intervention              |              |
| 5  |                                                           |     |                                                                                                              |              |
| 6  |                                                           | 6b  | Explanation for choice of comparators                                                                        | 8            |
| 7  |                                                           |     |                                                                                                              |              |
| 8  | Objectives                                                | 7   | Specific objectives or hypotheses                                                                            | 8            |
| 9  |                                                           |     |                                                                                                              |              |
| 10 | Trial design                                              | 8   | Description of trial design including type of trial (eg, parallel group, crossover, factorial, single        | 8            |
| 11 |                                                           |     | group), allocation ratio, and framework (eg, superiority, equivalence, noninferiority, exploratory)          |              |
| 12 |                                                           |     |                                                                                                              |              |
| 13 |                                                           |     |                                                                                                              |              |
| 14 | <b>Methods: Participants, interventions, and outcomes</b> |     |                                                                                                              |              |
| 15 |                                                           |     |                                                                                                              |              |
| 16 | Study setting                                             | 9   | Description of study settings (eg, community clinic, academic hospital) and list of countries where          | 8            |
| 17 |                                                           |     | data will be collected. Reference to where list of study sites can be obtained                               |              |
| 18 |                                                           |     |                                                                                                              |              |
| 19 | Eligibility criteria                                      | 10  | Inclusion and exclusion criteria for participants. If applicable, eligibility criteria for study centres and | 8            |
| 20 |                                                           |     | individuals who will perform the interventions (eg, surgeons, psychotherapists)                              |              |
| 21 |                                                           |     |                                                                                                              |              |
| 22 |                                                           |     |                                                                                                              |              |
| 23 | Interventions                                             | 11a | Interventions for each group with sufficient detail to allow replication, including how and when they        | 12           |
| 24 |                                                           |     | will be administered                                                                                         |              |
| 25 |                                                           |     |                                                                                                              |              |
| 26 |                                                           | 11b | Criteria for discontinuing or modifying allocated interventions for a given trial participant (eg, drug      | N/A          |
| 27 |                                                           |     | dose change in response to harms, participant request, or improving/worsening disease)                       |              |
| 28 |                                                           |     |                                                                                                              |              |
| 29 |                                                           | 11c | Strategies to improve adherence to intervention protocols, and any procedures for monitoring                 | 22           |
| 30 |                                                           |     | adherence (eg, drug tablet return, laboratory tests)                                                         |              |
| 31 |                                                           |     |                                                                                                              |              |
| 32 |                                                           | 11d | Relevant concomitant care and interventions that are permitted or prohibited during the trial                | N/A          |
| 33 |                                                           |     |                                                                                                              |              |
| 34 | Outcomes                                                  | 12  | Primary, secondary, and other outcomes, including the specific measurement variable (eg, systolic            | 9            |
| 35 |                                                           |     | blood pressure), analysis metric (eg, change from baseline, final value, time to event), method of           |              |
| 36 |                                                           |     | aggregation (eg, median, proportion), and time point for each outcome. Explanation of the clinical           |              |
| 37 |                                                           |     | relevance of chosen efficacy and harm outcomes is strongly recommended                                       |              |
| 38 |                                                           |     |                                                                                                              |              |
| 39 |                                                           |     |                                                                                                              |              |
| 40 | Participant timeline                                      | 13  | Time schedule of enrolment, interventions (including any run-ins and washouts), assessments, and             | Figure 1 and |
| 41 |                                                           |     | visits for participants. A schematic diagram is highly recommended (see Figure)                              | Table 2      |
| 42 |                                                           |     |                                                                                                              |              |
| 43 |                                                           |     |                                                                                                              |              |
| 44 |                                                           |     |                                                                                                              |              |
| 45 |                                                           |     |                                                                                                              |              |
| 46 |                                                           |     |                                                                                                              |              |
| 47 |                                                           |     |                                                                                                              |              |

|    |                                                                     |     |                                                                                                                                                                                                                                                                                                                                                                                                              |         |
|----|---------------------------------------------------------------------|-----|--------------------------------------------------------------------------------------------------------------------------------------------------------------------------------------------------------------------------------------------------------------------------------------------------------------------------------------------------------------------------------------------------------------|---------|
| 1  | Sample size                                                         | 14  | Estimated number of participants needed to achieve study objectives and how it was determined, including clinical and statistical assumptions supporting any sample size calculations                                                                                                                                                                                                                        | 21      |
| 2  |                                                                     |     |                                                                                                                                                                                                                                                                                                                                                                                                              |         |
| 3  |                                                                     |     |                                                                                                                                                                                                                                                                                                                                                                                                              |         |
| 4  | Recruitment                                                         | 15  | Strategies for achieving adequate participant enrolment to reach target sample size                                                                                                                                                                                                                                                                                                                          | 17      |
| 5  |                                                                     |     |                                                                                                                                                                                                                                                                                                                                                                                                              |         |
| 6  |                                                                     |     |                                                                                                                                                                                                                                                                                                                                                                                                              |         |
| 7  | <b>Methods: Assignment of interventions (for controlled trials)</b> |     |                                                                                                                                                                                                                                                                                                                                                                                                              |         |
| 8  |                                                                     |     |                                                                                                                                                                                                                                                                                                                                                                                                              |         |
| 9  | Allocation:                                                         |     |                                                                                                                                                                                                                                                                                                                                                                                                              |         |
| 10 |                                                                     |     |                                                                                                                                                                                                                                                                                                                                                                                                              |         |
| 11 | Sequence generation                                                 | 16a | Method of generating the allocation sequence (eg, computer-generated random numbers), and list of any factors for stratification. To reduce predictability of a random sequence, details of any planned restriction (eg, blocking) should be provided in a separate document that is unavailable to those who enrol participants or assign interventions                                                     | 12      |
| 12 |                                                                     |     |                                                                                                                                                                                                                                                                                                                                                                                                              |         |
| 13 |                                                                     |     |                                                                                                                                                                                                                                                                                                                                                                                                              |         |
| 14 |                                                                     |     |                                                                                                                                                                                                                                                                                                                                                                                                              |         |
| 15 |                                                                     |     |                                                                                                                                                                                                                                                                                                                                                                                                              |         |
| 16 |                                                                     |     |                                                                                                                                                                                                                                                                                                                                                                                                              |         |
| 17 | Allocation concealment mechanism                                    | 16b | Mechanism of implementing the allocation sequence (eg, central telephone; sequentially numbered, opaque, sealed envelopes), describing any steps to conceal the sequence until interventions are assigned                                                                                                                                                                                                    | 12,18   |
| 18 |                                                                     |     |                                                                                                                                                                                                                                                                                                                                                                                                              |         |
| 19 |                                                                     |     |                                                                                                                                                                                                                                                                                                                                                                                                              |         |
| 20 |                                                                     |     |                                                                                                                                                                                                                                                                                                                                                                                                              |         |
| 21 | Implementation                                                      | 16c | Who will generate the allocation sequence, who will enrol participants, and who will assign participants to interventions                                                                                                                                                                                                                                                                                    | 12      |
| 22 |                                                                     |     |                                                                                                                                                                                                                                                                                                                                                                                                              |         |
| 23 |                                                                     |     |                                                                                                                                                                                                                                                                                                                                                                                                              |         |
| 24 | Blinding (masking)                                                  | 17a | Who will be blinded after assignment to interventions (eg, trial participants, care providers, outcome assessors, data analysts), and how                                                                                                                                                                                                                                                                    | 18      |
| 25 |                                                                     |     |                                                                                                                                                                                                                                                                                                                                                                                                              |         |
| 26 |                                                                     |     |                                                                                                                                                                                                                                                                                                                                                                                                              |         |
| 27 |                                                                     |     |                                                                                                                                                                                                                                                                                                                                                                                                              |         |
| 28 |                                                                     | 17b | If blinded, circumstances under which unblinding is permissible, and procedure for revealing a participant's allocated intervention during the trial                                                                                                                                                                                                                                                         | N/A     |
| 29 |                                                                     |     |                                                                                                                                                                                                                                                                                                                                                                                                              |         |
| 30 |                                                                     |     |                                                                                                                                                                                                                                                                                                                                                                                                              |         |
| 31 |                                                                     |     |                                                                                                                                                                                                                                                                                                                                                                                                              |         |
| 32 | <b>Methods: Data collection, management, and analysis</b>           |     |                                                                                                                                                                                                                                                                                                                                                                                                              |         |
| 33 |                                                                     |     |                                                                                                                                                                                                                                                                                                                                                                                                              |         |
| 34 | Data collection methods                                             | 18a | Plans for assessment and collection of outcome, baseline, and other trial data, including any related processes to promote data quality (eg, duplicate measurements, training of assessors) and a description of study instruments (eg, questionnaires, laboratory tests) along with their reliability and validity, if known. Reference to where data collection forms can be found, if not in the protocol | Table 2 |
| 35 |                                                                     |     |                                                                                                                                                                                                                                                                                                                                                                                                              |         |
| 36 |                                                                     |     |                                                                                                                                                                                                                                                                                                                                                                                                              |         |
| 37 |                                                                     |     |                                                                                                                                                                                                                                                                                                                                                                                                              |         |
| 38 |                                                                     |     |                                                                                                                                                                                                                                                                                                                                                                                                              |         |
| 39 |                                                                     |     |                                                                                                                                                                                                                                                                                                                                                                                                              |         |
| 40 |                                                                     | 18b | Plans to promote participant retention and complete follow-up, including list of any outcome data to be collected for participants who discontinue or deviate from intervention protocols                                                                                                                                                                                                                    | 20      |
| 41 |                                                                     |     |                                                                                                                                                                                                                                                                                                                                                                                                              |         |
| 42 |                                                                     |     |                                                                                                                                                                                                                                                                                                                                                                                                              |         |
| 43 |                                                                     |     |                                                                                                                                                                                                                                                                                                                                                                                                              |         |
| 44 |                                                                     |     |                                                                                                                                                                                                                                                                                                                                                                                                              |         |
| 45 |                                                                     |     |                                                                                                                                                                                                                                                                                                                                                                                                              |         |
| 46 |                                                                     |     |                                                                                                                                                                                                                                                                                                                                                                                                              |         |
| 47 |                                                                     |     |                                                                                                                                                                                                                                                                                                                                                                                                              |         |

1 Data management 19 Plans for data entry, coding, security, and storage, including any related processes to promote data 22  
2 quality (eg, double data entry; range checks for data values). Reference to where details of data  
3 management procedures can be found, if not in the protocol  
4  
5 Statistical methods 20a Statistical methods for analysing primary and secondary outcomes. Reference to where other 20  
6 details of the statistical analysis plan can be found, if not in the protocol  
7  
8 20b Methods for any additional analyses (eg, subgroup and adjusted analyses) 20  
9  
10 20c Definition of analysis population relating to protocol non-adherence (eg, as randomised analysis), 20  
11 and any statistical methods to handle missing data (eg, multiple imputation)  
12  
13  
14

15 **Methods: Monitoring**

16 Data monitoring 21a Composition of data monitoring committee (DMC); summary of its role and reporting structure; 21a N/A  
17 statement of whether it is independent from the sponsor and competing interests; and reference to  
18 where further details about its charter can be found, if not in the protocol. Alternatively, an  
19 explanation of why a DMC is not needed  
20  
21  
22 21b Description of any interim analyses and stopping guidelines, including who will have access to these 21b N/A  
23 interim results and make the final decision to terminate the trial  
24  
25 Harms 22 Plans for collecting, assessing, reporting, and managing solicited and spontaneously reported 22 N/A  
26 adverse events and other unintended effects of trial interventions or trial conduct  
27  
28  
29 Auditing 23 Frequency and procedures for auditing trial conduct, if any, and whether the process will be 23 N/A  
30 independent from investigators and the sponsor  
31  
32

33 **Ethics and dissemination**

34  
35 Research ethics 24 Plans for seeking research ethics committee/institutional review board (REC/IRB) approval 24  
36 approval  
37  
38 Protocol 25 Plans for communicating important protocol modifications (eg, changes to eligibility criteria, 25  
39 amendments outcomes, analyses) to relevant parties (eg, investigators, REC/IRBs, trial participants, trial  
40 registries, journals, regulators)  
41  
42  
43  
44  
45  
46  
47



|    |                               |     |                                                                                                                                                                                                                                                                                     |                            |
|----|-------------------------------|-----|-------------------------------------------------------------------------------------------------------------------------------------------------------------------------------------------------------------------------------------------------------------------------------------|----------------------------|
| 1  | Consent or assent             | 26a | Who will obtain informed consent or assent from potential trial participants or authorised surrogates, and how (see Item 32)                                                                                                                                                        | 17                         |
| 2  |                               |     |                                                                                                                                                                                                                                                                                     |                            |
| 3  |                               |     |                                                                                                                                                                                                                                                                                     |                            |
| 4  |                               | 26b | Additional consent provisions for collection and use of participant data and biological specimens in ancillary studies, if applicable                                                                                                                                               | N/A                        |
| 5  |                               |     |                                                                                                                                                                                                                                                                                     |                            |
| 6  |                               |     |                                                                                                                                                                                                                                                                                     |                            |
| 7  | Confidentiality               | 27  | How personal information about potential and enrolled participants will be collected, shared, and maintained in order to protect confidentiality before, during, and after the trial                                                                                                | 22                         |
| 8  |                               |     |                                                                                                                                                                                                                                                                                     |                            |
| 9  |                               |     |                                                                                                                                                                                                                                                                                     |                            |
| 10 | Declaration of interests      | 28  | Financial and other competing interests for principal investigators for the overall trial and each study site                                                                                                                                                                       | 27                         |
| 11 |                               |     |                                                                                                                                                                                                                                                                                     |                            |
| 12 |                               |     |                                                                                                                                                                                                                                                                                     |                            |
| 13 | Access to data                | 29  | Statement of who will have access to the final trial dataset, and disclosure of contractual agreements that limit such access for investigators                                                                                                                                     | 27                         |
| 14 |                               |     |                                                                                                                                                                                                                                                                                     |                            |
| 15 |                               |     |                                                                                                                                                                                                                                                                                     |                            |
| 16 | Ancillary and post-trial care | 30  | Provisions, if any, for ancillary and post-trial care, and for compensation to those who suffer harm from trial participation                                                                                                                                                       | N/A                        |
| 17 |                               |     |                                                                                                                                                                                                                                                                                     |                            |
| 18 |                               |     |                                                                                                                                                                                                                                                                                     |                            |
| 19 |                               |     |                                                                                                                                                                                                                                                                                     |                            |
| 20 | Dissemination policy          | 31a | Plans for investigators and sponsor to communicate trial results to participants, healthcare professionals, the public, and other relevant groups (eg, via publication, reporting in results databases, or other data sharing arrangements), including any publication restrictions | 27                         |
| 21 |                               |     |                                                                                                                                                                                                                                                                                     |                            |
| 22 |                               |     |                                                                                                                                                                                                                                                                                     |                            |
| 23 |                               |     |                                                                                                                                                                                                                                                                                     |                            |
| 24 |                               | 31b | Authorship eligibility guidelines and any intended use of professional writers                                                                                                                                                                                                      | 27                         |
| 25 |                               |     |                                                                                                                                                                                                                                                                                     |                            |
| 26 |                               | 31c | Plans, if any, for granting public access to the full protocol, participant-level dataset, and statistical code                                                                                                                                                                     | 27                         |
| 27 |                               |     |                                                                                                                                                                                                                                                                                     |                            |
| 28 |                               |     |                                                                                                                                                                                                                                                                                     |                            |
| 29 | <b>Appendices</b>             |     |                                                                                                                                                                                                                                                                                     |                            |
| 30 |                               |     |                                                                                                                                                                                                                                                                                     |                            |
| 31 | Informed consent materials    | 32  | Model consent form and other related documentation given to participants and authorised surrogates                                                                                                                                                                                  | <b>Supplemental File 4</b> |
| 32 |                               |     |                                                                                                                                                                                                                                                                                     |                            |
| 33 |                               |     |                                                                                                                                                                                                                                                                                     |                            |
| 34 | Biological specimens          | 33  | Plans for collection, laboratory evaluation, and storage of biological specimens for genetic or molecular analysis in the current trial and for future use in ancillary studies, if applicable                                                                                      | N/A                        |
| 35 |                               |     |                                                                                                                                                                                                                                                                                     |                            |
| 36 |                               |     |                                                                                                                                                                                                                                                                                     |                            |

\*It is strongly recommended that this checklist be read in conjunction with the SPIRIT 2013 Explanation & Elaboration for important clarification on the items. Amendments to the protocol should be tracked and dated. The SPIRIT checklist is copyrighted by the SPIRIT Group under the Creative Commons "[Attribution-NonCommercial-NoDerivs 3.0 Unported](https://creativecommons.org/licenses/by-nc-nd/3.0/)" license.

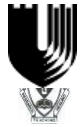

DUKE UNIVERSITY HEALTH SYSTEM

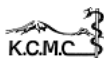

Tumaini University

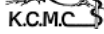

Kilimanjaro Christian Medical College

Consent to participate in a research study: **Identifying and Matching Individuals' Preferences for HIV/AIDS Counseling**  
Survey Consent, Version Date 13-Dec-2019

ID: \_\_\_\_\_ - \_\_\_\_\_ - \_\_\_\_\_

Name: \_\_\_\_\_

Fingerprint: \_\_\_\_\_

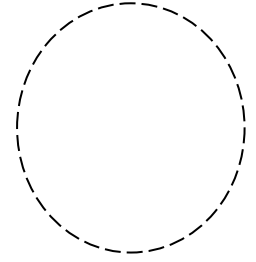

### *Concise Summary*

This is a research study to learn about preferences for HIV testing.

If you decide to enroll in this study, you will be asked to complete a survey administered by a study interviewer. The survey will ask you questions about your background (such as age and marital status), HIV testing history, and what you like or don't like about different HIV testing options.

At the end of the survey, we will describe several free testing options that you might want to use in the future. We will contact you periodically during the next 24 months to see if, and how, you decided to test for HIV.

There are no major risks involved with study participation.

If you are interested in learning more about this study, please continue reading below.

### **Introduction:**

You are asked to take part in a research study about preferences for HIV testing. This study is under the direction of Dr. Bernard Njau at Kilimanjaro Christian Medical Centre and Drs. Jan Ostermann and Nathan Thielman at Duke University and the University of South Carolina in the United States. This study is sponsored by the United States' National Institutes of Health.

Research studies are voluntary. As your study staff member reads this form to you, please take your time deciding whether to participate. Please ask him/her to explain anything that you do not clearly understand. The purpose of the study, procedures, risks, and benefits are described below.

The research team will give you a copy of this form. It is important that you know:

- Your participation is entirely voluntary;
- You may decide not to take part or to withdraw from the study at any time

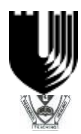

DUKE UNIVERSITY HEALTH SYSTEM

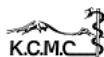

Tumaini University  
 Killimanjaro Christian Medical College

Consent to participate in a research study: **Identifying and Matching Individuals' Preferences for HIV/AIDS Counseling**  
 Survey Consent, Version Date 13-Dec-2019

ID: \_\_\_\_\_ - \_\_\_\_\_ - \_\_\_\_\_

Name: \_\_\_\_\_

Fingerprint: \_\_\_\_\_

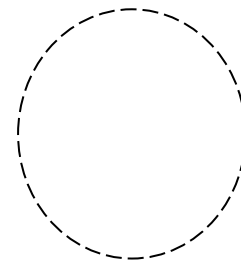**Purpose:**

The purpose of this study is to determine which characteristics of HIV testing programs influence HIV testing decisions.

**Who Will Be In This Study and How Long Will This Study Last?**

Approximately 2,500 persons will participate in surveys about HIV testing. After the completion of today's survey, you may be contacted again during the next 24 months with follow-up questions and offers for HIV testing.

**Procedures:**

The survey will last approximately 60 minutes. After you have signed and dated the consent form we will ask you questions about issues such as:

- Age and marital status,
- HIV risk behaviors,
- HIV testing, and
- Attitudes toward different HIV testing options
- Experiences with HIV treatment

Some participants will receive invitation cards to test for HIV. You may receive SMS reminders or incentives to test, and you will be periodically re-contacted to answer questions about your risk behaviors and testing decisions. You may also be offered other testing options in the future. HIV test results will be linked to your study data without your name.

**Risks and discomforts:**

Talking about HIV testing may cause some people to experience discomfort. You can refuse to answer any questions, and you can stop the interview at any time.

**Benefits:**

You will not receive any direct benefit from participating.

**Confidentiality:**

Study records will be kept confidential as required by law. Your records will be assigned a unique study number. If you choose to test for HIV using any of the options offered to you, only this number will be used to link your HIV test result to your study data. If we collect your fingerprints today, they may be used to verify your identity. All information is stored in a secure database. Information that links your name to the study number will be kept in a locked cabinet that can only be accessed by members of the research team. Your survey data will be shared with members of the research team at Duke University and the University of South Carolina in the U.S. When information is sent to the U.S. it is sent through a secure

1  
 2 Form  
 3 M0345  
 4  
 5  
 6  
 7  
 8  
 9  
 10  
 11  
 12  
 13  
 14  
 15  
 16  
 17  
 18  
 19  
 20  
 21  
 22  
 23  
 24  
 25  
 26  
 27  
 28  
 29  
 30  
 31  
 32  
 33  
 34  
 35  
 36  
 37  
 38  
 39  
 40  
 41  
 42  
 43  
 44  
 45  
 46  
 47  
 48  
 49  
 50  
 51  
 52  
 53  
 54  
 55  
 56  
 57  
 58  
 59

60 DUHS IRB

IRB NUMBER: Pro00075996

IRB REFERENCE DATE: 12/26/2019

IRB EXPIRATION DATE: 10/21/2021



DUKE UNIVERSITY HEALTH SYSTEM



Tumaini University  
 Kilimanjaro Christian Medical College

Consent to participate in a research study: **Identifying and Matching Individuals' Preferences for HIV/AIDS Counseling**  
 Survey Consent, Version Date 13-Dec-2019

ID: \_\_\_\_\_ - \_\_\_\_\_ - \_\_\_\_\_

Phone: 0 \_\_\_\_\_

Fingerprint: 

internet connection. When information from this study is presented at scientific meetings or in scientific journals, your identity will not be revealed.

A description of this clinical trial will be available on [www.ClinicalTrials.gov](http://www.ClinicalTrials.gov), as required by U.S. law. This website will not include information that can identify you. At most, the website will include a summary of the results. You can search this website at any time.

### **Voluntary Participation/Right to Withdraw:**

You may choose not to be in the study, or, if you agree to be in the study, you may withdraw from the study at any time. If you agree to participate, you may refuse to answer any question or stop the interview at any time. Your decision not to participate or to withdraw from the study will not involve any penalty or loss of benefits and will not affect your access to health care.

### **Cost to you:**

There is no cost to you for taking part in this research study.

### **Payments to participants:**

You will receive a minimum of TSH 10,000 after the completion of today's survey, and after any other survey for which you are asked to return to the study offices. After receiving the compensation you may be offered choices that could result in a higher or lower amount.

### **Whom do I call if I have questions or problems?**

For questions about this study or if you have problems, concerns, questions, or suggestions about the research, contact Dr. Bernard Njau at KCMC (telephone number 0784-300-846). For questions about your rights as a research participant or to discuss problems or concerns related to the research contact the KCMC Ethics Committee at 027-275-3616.

1  
2  
3 Form  
4 M0345  
5  
6  
7  
8  
9  
10  
11  
12  
13  
14  
15  
16  
17  
18  
19  
20  
21  
22  
23  
24  
25  
26  
27  
28  
29  
30  
31  
32  
33  
34  
35  
36  
37  
38  
39  
40  
41  
42  
43  
44  
45  
46  
47  
48  
49  
50  
51  
52  
53  
54  
55  
56  
57  
58  
59  
60

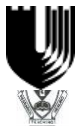

DUKE UNIVERSITY HEALTH SYSTEM

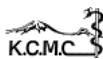

Tumaini University  
Killimanjaro Christian Medical College

Consent to participate in a research study: **Identifying and Matching Individuals' Preferences for HIV/AIDS Counseling**  
Survey Consent, Version Date 13-Dec-2019

ID: \_\_\_\_\_ - \_\_\_\_\_ - \_\_\_\_\_

DOB: \_\_\_\_\_ / \_\_\_\_\_ / 19\_\_\_\_  
(dd / mm / yyyy)

Fingerprint:

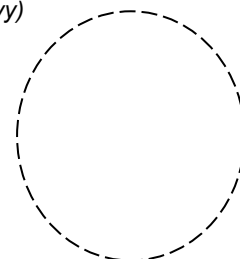

**Optional permission for future contact:**

I give permission for members of the research team for this study to contact me about other components of this study, or about other studies, in the future. It will be my choice whether or not to participate in those studies at that time.

\_\_\_\_\_ **Yes**      \_\_\_\_\_ **No**      \_\_\_\_\_ **Initials**

**STATEMENT OF CONSENT**

"The purpose of this study, procedures to be followed, risks and benefits have been explained to me. I have been allowed to ask questions, and my questions have been answered to my satisfaction. I have been told whom to contact if I have questions, to discuss problems, concerns, or suggestions related to the research, or to obtain information or offer input about the research. I have read this consent form and agree to be in this study, with the understanding that I may withdraw at any time. I have been told that I will be given a signed and dated copy of this consent form."

\_\_\_\_\_  
Name of Participant in block letters

\_\_\_\_\_  
Signature of Participant

\_\_\_\_\_  
Date

\_\_\_\_\_  
Time

\_\_\_\_\_  
Name of Interviewer in block letters

\_\_\_\_\_  
Signature of Interviewer

\_\_\_\_\_  
Date

\_\_\_\_\_  
Time

DUHS IRB

IRB NUMBER: Pro00075996

IRB REFERENCE DATE: 12/26/2019

IRB EXPIRATION DATE: 10/21/2021
