# Supplementary material for: Using discrete choice experiments to design interventions for heterogeneous preferences: protocol for a pragmatic randomised controlled trial of a preference-informed, heterogeneity-focused, HIV testing offer for high-risk populations
Source: PubMed Central journal article supplement — BMJ Open. 2020 Nov 6;10(11):e039313. doi: 10.1136/bmjopen-2020-039313 (PMC7651730; doi:10.1136/bmjopen-2020-039313), 2020-11-06
Supplement: bmjopen-2020-039313supp002.pdf [file bmjopen-2020-039313supp002.pdf]

**Supplemental File 2: WHO Trial Registration Data Set**

| <b>Data category</b>                          | <b>Information</b>                                                                                                                                                                                                                                                                                                                                                                                   |
|-----------------------------------------------|------------------------------------------------------------------------------------------------------------------------------------------------------------------------------------------------------------------------------------------------------------------------------------------------------------------------------------------------------------------------------------------------------|
| Primary registry and trial identifying number | ClinicalTrials.gov<br>NCT02714140                                                                                                                                                                                                                                                                                                                                                                    |
| Date of registration in primary registry      | March 21, 2016                                                                                                                                                                                                                                                                                                                                                                                       |
| Secondary identifying numbers                 | N/A                                                                                                                                                                                                                                                                                                                                                                                                  |
| Source of monetary/material support           | National Institute of Mental Health (R01MH106388)<br>6001 Executive Boulevard<br>Bethesda, MD 20892-9663                                                                                                                                                                                                                                                                                             |
| Primary sponsor                               | University of South Carolina, USA                                                                                                                                                                                                                                                                                                                                                                    |
| Secondary sponsor(s)                          | Kilimanjaro Christian Medical Centre, Tanzania                                                                                                                                                                                                                                                                                                                                                       |
| Contact for public queries                    | Jan Ostermann, PhD<br>Ph: 8037778747<br><a href="mailto:jano@mailbox.sc.edu">jano@mailbox.sc.edu</a><br>Nathan Thielman, MD<br>Ph: 9196681721<br><a href="mailto:n.thielman@duke.edu">n.thielman@duke.edu</a>                                                                                                                                                                                        |
| Contact for scientific queries                | Jan Ostermann, PhD<br>Ph: 8037778747<br><a href="mailto:jano@mailbox.sc.edu">jano@mailbox.sc.edu</a><br>Nathan Thielman, MD<br>Ph: 9196681721<br><a href="mailto:n.thielman@duke.edu">n.thielman@duke.edu</a>                                                                                                                                                                                        |
| Public title                                  | Does Preference-based HIV Testing Increase Uptake in High Risk Populations?                                                                                                                                                                                                                                                                                                                          |
| Scientific title                              | Using <u>DCEs</u> to <u>I</u> dentify and <u>M</u> atch Preferences for HIV/ <u>A</u> IDS <u>C</u> ounseling and <u>T</u> esting (DCE-IMPACT)                                                                                                                                                                                                                                                        |
| Countries of recruitment                      | Tanzania                                                                                                                                                                                                                                                                                                                                                                                             |
| Health conditions or problems studied         | HIV, HIV testing                                                                                                                                                                                                                                                                                                                                                                                     |
| Intervention(s)                               | Behavioral: Invitation cards<br>Behavioral: Reminders<br>Behavioral: Conditional economic transfers                                                                                                                                                                                                                                                                                                  |
| Key inclusion and exclusion criteria          | Ages Eligible for Study: 18 Years and older<br>Sexes Eligible for Study: Any<br>Accepts Healthy Volunteers: Yes<br>Inclusion criteria: Women employed in bars, restaurants and guesthouses serving alcohol to patrons ("female barworkers") and male mountain porters who are supporting climbers of nearby Mount Kilimanjaro ("Kilimanjaro mountain porters")<br>Exclusion criteria: Unable to read |
| Study type                                    | Interventional (Clinical Trial)                                                                                                                                                                                                                                                                                                                                                                      |
| Date of first enrolment                       | 12-February-2019                                                                                                                                                                                                                                                                                                                                                                                     |
| Target sample size                            | 1200                                                                                                                                                                                                                                                                                                                                                                                                 |
| Recruitment status                            | Ongoing                                                                                                                                                                                                                                                                                                                                                                                              |
| Primary outcome(s)                            | Uptake of HIV testing                                                                                                                                                                                                                                                                                                                                                                                |
| Key secondary outcomes                        | N/A                                                                                                                                                                                                                                                                                                                                                                                                  |
